# Supplementary material for: Highly selective catalyst- and additive-free iodosulfonylation of cyclopropenes in water
Source: Royal Society of Chemistry journal article supplement (doi:10.1039/d2gc04296g), 2022-12-16

## Supporting Information

### **Highly Selective Catalyst- and Additive-Free Iodosulfonylation of Cyclopropenes in Water**

Chuxiong Peng,<sup>a†</sup> Fengyan Gu,<sup>a†</sup> Xiaofeng Lin,<sup>a</sup> Ning Ding,<sup>a</sup> Qichen Zhan,<sup>a</sup> Peng Cao<sup>\*a,b,c,d</sup> and Tao Cao<sup>\*a</sup>

<sup>a</sup> School of Pharmacy, Nanjing University of Chinese Medicine, Nanjing 210023, P. R. China.

<sup>b</sup> Affiliated Hospital of Integrated Traditional Chinese and Western Medicine, Nanjing University of Chinese Medicine, Nanjing 210028, P. R. China.

<sup>c</sup> Zhenjiang Hospital of Chinese Traditional and Western Medicine, Zhenjiang 212002, P. R. China.

<sup>d</sup> Gaoyou Hospital of Traditional Chinese Medicine, Yangzhou 225600, P. R. China

E-mail: caot@njucm.edu.cn, cao\_peng@njucm.edu.cn

† These authors contributed equally to this work.

#### **Index**

|                                                                                 |     |
|---------------------------------------------------------------------------------|-----|
| 1. General Information                                                          | S2  |
| 2. Experimental Details and Analytical Data for Compounds                       | S3  |
| 3. References                                                                   | S40 |
| 4. <sup>1</sup> H NMR, <sup>13</sup> C NMR, <sup>19</sup> F NMR and NOE Spectra | S41 |

**General Information:** All the temperatures are referred to the preheated oil baths used. The reaction under microwave conditions was performed on a microwave reactor (Discover 2.0, CEM Corporation, USA). Commercially available reagents and solvents were purchased from Adamas, Sinopharm, and Sigma-Aldrich.  $^1\text{H}$  NMR spectra were recorded on a Bruker AVANCE III 500 spectrometer in  $\text{CDCl}_3$  ( $\delta$  7.26 ppm) or  $\text{DMSO-}d_6$  ( $\delta$  2.50 ppm). The data are reported as follows: chemical shift ( $\delta$  ppm), multiplicity (s = singlet, d = doublet, t = triplet, q = quartet, m = multiplet, dd = doublet of doublets, dt = doublet of triplets, td = triplet of doublets, tt = triplet of triplets), coupling constant (Hz), and integration.  $^{13}\text{C}$  NMR spectra were recorded on a Bruker AVANCE III 500 spectrometer and data are reported in terms of chemical shift relative to  $\text{CDCl}_3$  (77.10 ppm) or  $\text{DMSO-}d_6$  ( $\delta$  39.60 ppm).

## 1. Iodosulfonylation of cyclopropenes.

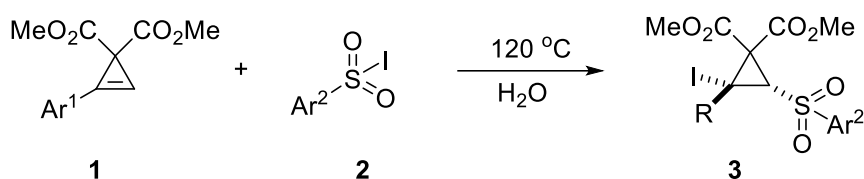

**General Procedure I:** To a 10 mL reaction tube equipped with a stirring bar was added **1** (1.0 equiv), **2** (1.2 equiv), and H<sub>2</sub>O (*c* = 0.1 mol/L for **1**) successively, and the tube was sealed with a septum. The mixture was heated at 120 °C for indicated time. After the reaction was complete, the mixture was filtered and triturated with a mixture of ethyl acetate and petroleum ether to afford corresponding product.

**(1) Dimethyl (2*R*\*,3*S*\*)-2-iodo-2-phenyl-3-tosylcyclopropane-1,1-dicarboxylate (3a) (pcx-2-41, pcx-7-38, pcx-9-11).**

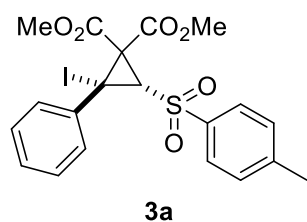

Following General Procedure I, after being stirred for 2 h, **3a** was afforded as a white solid (0.2 mmol scale, 85.6 mg, 83%) by filtration and trituration (ethyl acetate/petroleum ether = 1:20): m.p. 172.0 °C (decomposition); <sup>1</sup>H NMR (500 MHz, CDCl<sub>3</sub>) δ 8.05 (d, *J* = 8.2 Hz, 2 H), 7.43 (d, *J* = 8.1 Hz, 2 H), 7.22 (t, *J* = 7.5 Hz, 2 H), 7.14 (t, *J* = 7.4 Hz, 1 H), 7.07 (d, *J* = 7.6 Hz, 2 H), 3.97 (s, 3 H), 3.73 (s, 1 H), 3.51 (s, 3 H), 2.50 (s, 3 H); <sup>13</sup>C NMR (126 MHz, CDCl<sub>3</sub>) δ 163.19, 162.20, 145.59, 143.06, 136.87, 130.08, 128.81, 128.71, 128.63, 126.85, 53.86, 53.52, 51.31, 44.87, 21.84, 6.94; HRMS calcd for C<sub>20</sub>H<sub>19</sub>INaO<sub>6</sub>S ([M+Na]<sup>+</sup>): 536.9839; found: 536.9840.

### Crystal data and structure refinement of 3a:

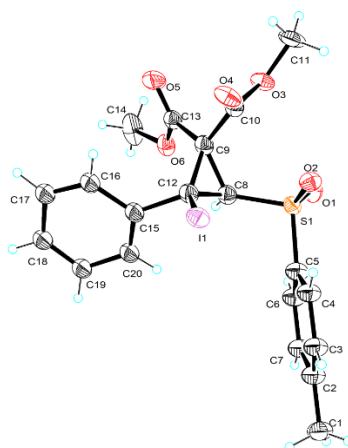

|                                                               |                                                             |                                                  |
|---------------------------------------------------------------|-------------------------------------------------------------|--------------------------------------------------|
| Bond precision:                                               | C-C = 0.0474 Å                                              | Wavelength=1.54184                               |
| Cell:                                                         | a=6.8727(9)      b=7.4757(10)      c=10.7012(13)            |                                                  |
|                                                               | alpha=75.161(12)      beta=88.164(11)      gamma=77.878(12) |                                                  |
| Temperature:                                                  | 293 K                                                       |                                                  |
|                                                               | Calculated                                                  | Reported                                         |
| Volume                                                        | 519.48(12)                                                  | 519.48(12)                                       |
| Space group                                                   | P 1                                                         | P 1                                              |
| Hall group                                                    | P 1                                                         | P 1                                              |
| Moiety formula                                                | C <sub>20</sub> H <sub>19</sub> I O <sub>6</sub>            | C <sub>20</sub> H <sub>19</sub> I O <sub>6</sub> |
| Sum formula                                                   | C <sub>20</sub> H <sub>19</sub> I O <sub>6</sub>            | C <sub>20</sub> H <sub>19</sub> I O <sub>6</sub> |
| Mr                                                            | 514.31                                                      | 514.31                                           |
| D <sub>x</sub> , g cm <sup>-3</sup>                           | 1.644                                                       | 1.644                                            |
| Z                                                             | 1                                                           | 1                                                |
| Mu (mm <sup>-1</sup> )                                        | 13.341                                                      | 13.341                                           |
| F <sub>000</sub>                                              | 256.0                                                       | 256.0                                            |
| F <sub>000</sub> '                                            | 256.76                                                      |                                                  |
| h,k,lmax                                                      | 7,8,12                                                      | 7,8,12                                           |
| Nref                                                          | 3416[ 1708]                                                 | 1979                                             |
| Tmin,Tmax                                                     | 0.472,0.586                                                 | 0.338,1.000                                      |
| Tmin'                                                         | 0.428                                                       |                                                  |
| Correction method= # Reported T Limits: Tmin=0.338 Tmax=1.000 |                                                             |                                                  |
| AbsCorr = MULTI-SCAN                                          |                                                             |                                                  |
| Data completeness= 1.16/0.58                                  | Theta(max)= 63.656                                          |                                                  |
| R(reflections)= 0.0875( 1636)                                 | wR2(reflections)= 0.2652( 1979)                             |                                                  |
| S = 1.056                                                     | Npar= 257                                                   |                                                  |

**(2) Dimethyl (2*R*\*,3*S*\*)-2-iodo-2-(*p*-tolyl)-3-tosylcyclopropane-1,1-dicarboxylate (3b) (pcx-2-45, pcx-11-3).**

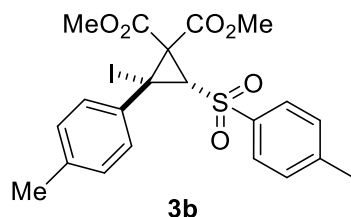

Following General Procedure I, after being stirred for 10 h, **3b** was afforded as a white solid (0.2 mmol scale, 81.5 mg, 77%) by filtration and trituration (ethyl acetate/petroleum ether = 1:20): m.p. 193.7-194.9 °C; <sup>1</sup>H NMR (500 MHz, CDCl<sub>3</sub>) δ 8.04 (d, *J* = 8.0 Hz, 2 H), 7.43 (d, *J* = 8.0 Hz, 2 H), 7.02 (d, *J* = 7.9 Hz, 2 H), 6.96 (d, *J* = 7.9 Hz, 2 H), 3.96 (s, 3 H), 3.70 (s, 1 H), 3.53 (s, 3 H), 2.49 (s, 3 H), 2.28 (s, 3 H); <sup>13</sup>C NMR (126 MHz, DMSO-*d*<sub>6</sub>) δ 163.01, 161.75, 145.39, 140.28, 137.72, 136.62, 130.01, 129.23, 128.51, 126.71, 53.93, 53.16, 50.08, 44.32, 21.27, 20.67, 5.99; HRMS calcd for C<sub>21</sub>H<sub>21</sub>INaO<sub>6</sub>S ([M+Na]<sup>+</sup>): 550.9996; found: 550.9996.

**(3) Dimethyl (2*R*\*,3*S*\*)-2-(4-ethylphenyl)-2-iodo-3-tosylcyclopropane-1,1-dicarboxylate (3c) (pcx-4-49, pcx-11-37).**

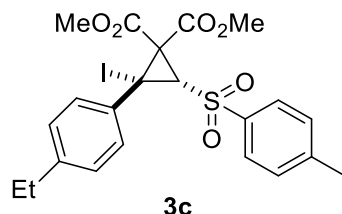

Following General Procedure I, after being stirred for 2.5 h, **3c** was afforded as a white solid (0.1 mmol scale, 37.9 mg, 70%) by filtration and trituration (ethyl acetate/petroleum ether = 1:20): m.p. 161.8 °C (decomposition); <sup>1</sup>H NMR (500 MHz, CDCl<sub>3</sub>) δ 8.05 (d, *J* = 8.1 Hz, 2 H), 7.43 (d, *J* = 8.0 Hz, 2 H), 7.04 (d, *J* = 8.0 Hz, 2 H), 6.97 (d, *J* = 7.8 Hz, 2 H), 3.96 (s, 3 H), 3.71 (s, 1 H), 3.52 (s, 3 H), 2.57 (q, *J* = 7.6 Hz, 2 H), 2.49 (s, 3 H), 1.16 (t, *J* = 7.6 Hz, 3 H); <sup>13</sup>C NMR (126 MHz, CDCl<sub>3</sub>) δ 163.27, 162.30, 145.55, 144.85, 140.38, 137.00, 130.07, 128.76, 128.28, 126.81, 53.84, 53.51,

51.41, 45.00, 28.47, 21.85, 15.18, 7.04; HRMS calcd for  $C_{22}H_{23}INaO_6S$  ( $[M+Na]^+$ ): 565.0152; found: 565.0158.

**(4) Dimethyl (2*R*\*,3*S*\*)-2-(4-(*tert*-butyl)phenyl)-2-iodo-3-tosylcyclopropane-1,1-dicarboxylate (3d) (pcx-4-48, pcx-11-4).**

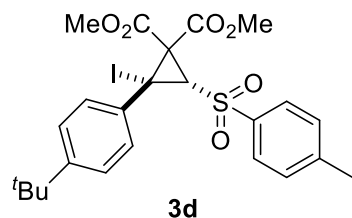

Following General Procedure I, after being stirred for 2 h, **3d** was afforded as a white solid (0.2 mmol scale, 65.4 mg, 57%) by filtration and trituration (ethyl acetate/petroleum ether = 1:20): m.p. 179.4-181.0 °C;  $^1H$  NMR (500 MHz,  $CDCl_3$ )  $\delta$  8.05 (d,  $J$  = 8.0 Hz, 2 H), 7.43 (d,  $J$  = 8.0 Hz, 2 H), 7.21 (d,  $J$  = 8.2 Hz, 2 H), 6.97 (d,  $J$  = 8.0 Hz, 2 H), 3.97 (s, 3 H), 3.71 (s, 1 H), 3.50 (s, 3 H), 2.50 (s, 3 H), 1.23 (s, 9 H);  $^{13}C$  NMR (126 MHz,  $CDCl_3$ )  $\delta$  163.23, 162.30, 151.77, 145.55, 140.02, 136.96, 130.07, 128.78, 126.54, 125.72, 53.77, 53.52, 51.31, 44.90, 34.65, 31.25, 21.86, 7.05; HRMS calcd for  $C_{24}H_{27}INaO_6S$  ( $[M+Na]^+$ ): 593.0465; found: 593.0464.

**(5) Dimethyl (2*R*\*,3*S*\*)-2-(4-fluorophenyl)-2-iodo-3-tosylcyclopropane-1,1-dicarboxylate (3e) (pcx-3-48).**

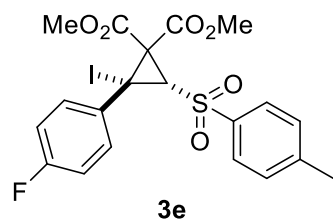

Following General Procedure I, after being stirred for 2 h, **3e** was afforded as a white solid (0.2 mmol scale, 76.1 mg, 71% yield) by filtration and trituration (ethyl acetate/petroleum ether = 1:20): m.p. 166.4-168.0 °C;  $^1H$  NMR (500 MHz,  $CDCl_3$ )  $\delta$  8.03 (d,  $J$  = 6.7 Hz, 2 H), 7.43 (d,  $J$  = 8.2 Hz, 2 H), 7.10-7.04 (m, 2 H), 6.92 (t,  $J$  = 8.7 Hz, 2 H), 3.97 (s, 3 H), 3.68 (s, 1 H), 3.54 (s, 3 H), 2.50 (s, 3 H);  $^{13}C$  NMR (126 MHz,  $CDCl_3$ )  $\delta$  163.19 (d,  $J$  = 6.8 Hz), 162.08, 161.23, 145.71, 139.18 (d,  $J$  = 3.4 Hz), 136.84, 130.14, 128.84 (d,  $J$  = 8.5 Hz), 128.69, 115.93 (d,  $J$  = 22.2 Hz), 53.99, 53.58, 51.45,

44.99, 21.86, 5.66;  $^{19}\text{F}$  NMR (471 MHz,  $\text{CDCl}_3$ )  $\delta$  -111.78; HRMS calcd for  $\text{C}_{20}\text{H}_{18}\text{FINaO}_6\text{S}$  ( $[\text{M}+\text{Na}]^+$ ): 554.9745; found: 554.9747.

**(6) Dimethyl (2*R*\*,3*S*\*)-2-(4-chlorophenyl)-2-iodo-3-tosylcyclopropane-1,1-dicarboxylate (3f) (pcx-2-47).**

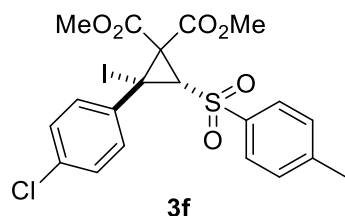

Following General Procedure I, after being stirred for 3.5 h, **3f** was afforded as a white solid (0.2 mmol scale, 76.8 mg, 70%) by filtration and trituration (ethyl acetate/petroleum ether = 1:20): m.p. 181.7 °C (decomposition);  $^1\text{H}$  NMR (500 MHz,  $\text{CDCl}_3$ )  $\delta$  8.03 (d,  $J$  = 8.3 Hz, 2 H), 7.43 (d,  $J$  = 8.1 Hz, 2 H), 7.20 (d,  $J$  = 8.8 Hz, 2 H), 7.01 (d,  $J$  = 8.2 Hz, 2 H), 3.97 (s, 3 H), 3.66 (s, 1 H), 3.55 (s, 3 H), 2.50 (s, 3 H);  $^{13}\text{C}$  NMR (126 MHz,  $\text{CDCl}_3$ )  $\delta$  163.14, 162.02, 145.74, 141.66, 136.81, 134.51, 130.14, 129.10, 128.69, 128.29, 54.05, 53.59, 51.33, 44.90, 21.86, 5.70; HRMS calcd for  $\text{C}_{20}\text{H}_{18}^{35}\text{ClINaO}_6\text{S}$  ( $[\text{M}+\text{Na}]^+$ ): 570.9450; found: 570.9451.

**(7) Dimethyl (2*R*\*,3*S*\*)-2-iodo-2-(4-(methoxycarbonyl)phenyl)-3-tosylcyclopropane-1,1-dicarboxylate (3g) (pcx-2-48).**

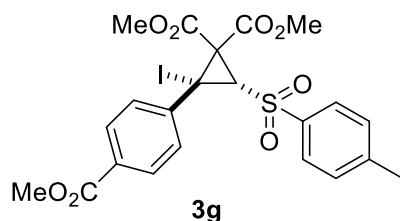

Following General Procedure I, after being stirred for 2 h, **3g** was afforded as a white solid (0.2 mmol scale, 91.8 mg, 80%) by filtration and trituration (ethyl acetate/petroleum ether = 1:20): m.p. 190.7-191.9 °C;  $^1\text{H}$  NMR (500 MHz,  $\text{DMSO}-d_6$ )  $\delta$  8.07 (d,  $J$  = 7.9 Hz, 2 H), 7.88 (d,  $J$  = 8.0 Hz, 2 H), 7.54 (d,  $J$  = 7.9 Hz, 2 H), 7.22 (d,  $J$  = 8.0 Hz, 2 H), 4.14 (s, 1 H), 3.83 (s, 6 H), 3.43 (s, 3 H), 2.45 (s, 3 H);  $^{13}\text{C}$  NMR (126 MHz,  $\text{DMSO}-d_6$ )  $\delta$  165.50, 163.03, 161.62, 147.85, 145.49, 136.53, 130.03, 129.66,

129.23, 128.52, 127.35, 54.07, 53.25, 52.34, 49.84, 44.14, 21.28, 5.43; HRMS calcd for  $C_{22}H_{21}INaO_8S$  ( $[M+Na]^+$ ): 594.9894; found: 594.9896.

**(8) Dimethyl (2*R*\*,3*S*\*)-2-iodo-2-(3-(methoxycarbonyl)phenyl)-3-tosylcyclopropane-1,1-dicarboxylate (3h) (pcx-6-25, pcx-11-7).**

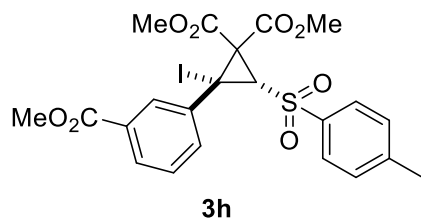

Following General Procedure I, after being stirred for 2 h, **3h** was afforded as a white solid (0.2 mmol scale, 97.8 mg, 85%) by filtration and trituration (ethyl acetate/petroleum ether = 1:20): m.p. 173.2-175.0 °C;  $^1H$  NMR (500 MHz,  $CDCl_3$ )  $\delta$  8.05 (d,  $J$  = 8.1 Hz, 2 H), 7.83 (d,  $J$  = 7.6 Hz, 1 H), 7.70 (s, 1 H), 7.45 (d,  $J$  = 8.0 Hz, 2 H), 7.32 (t,  $J$  = 7.7 Hz, 1 H), 7.28 (s, 1 H), 3.98 (s, 3 H), 3.89 (s, 3 H), 3.71 (s, 1 H), 3.55 (s, 3 H), 2.50 (s, 3 H);  $^{13}C$  NMR (126 MHz,  $CDCl_3$ )  $\delta$  166.02, 163.25, 162.08, 145.74, 143.66, 136.83, 131.46, 130.89, 130.14, 129.74, 129.11, 128.75, 127.79, 54.02, 53.61, 52.35, 51.31, 44.84, 21.87, 6.07; HRMS calcd for  $C_{22}H_{21}INaO_8S$  ( $[M+Na]^+$ ): 594.9894; found: 594.9899.

**(9) Dimethyl (2*R*\*,3*S*\*)-2-iodo-2-phenyl-3-(phenylsulfonyl)cyclopropane-1,1-dicarboxylate (3j) (pcx-2-42, pcx-11-17).**

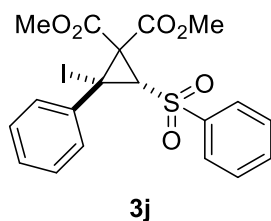

Following General Procedure I, after being stirred for 3 h, **3j** was afforded as a white solid (0.2 mmol scale, 81.1 mg, 81%) by filtration and trituration (ethyl acetate/petroleum ether = 1:20): m.p. 166.5 °C (decomposition);  $^1H$  NMR (500 MHz,  $CDCl_3$ )  $\delta$  8.18 (d,  $J$  = 7.1 Hz, 2 H), 7.75 (t,  $J$  = 7.5 Hz, 1 H), 7.65 (t,  $J$  = 7.8 Hz, 2 H), 7.22 (t,  $J$  = 7.8 Hz, 2 H), 7.15 (t,  $J$  = 7.4 Hz, 1 H), 7.06 (d,  $J$  = 6.6 Hz, 2 H), 3.98 (s, 3 H), 3.74 (s, 1 H), 3.52 (s, 3 H);  $^{13}C$  NMR (126 MHz,  $CDCl_3$ )  $\delta$  163.13, 162.15, 142.99,

139.81, 134.48, 129.48, 128.83, 128.67, 128.66, 126.82, 53.90, 53.56, 51.30, 45.00, 6.81; HRMS calcd for C<sub>19</sub>H<sub>17</sub>INaO<sub>6</sub>S ([M+Na]<sup>+</sup>): 522.9683; found: 522.9684.

**(10) Dimethyl (2*R*\*,3*S*\*)-2-iodo-3-(phenylsulfonyl)-2-(*p*-tolyl)cyclopropane-1,1-dicarboxylate (3k) (pcx-2-49, pcx-11-16).**

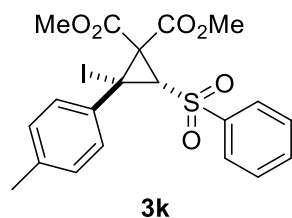

Following General Procedure I, after being stirred for 2 h, **3k** was afforded as a white solid (0.2 mmol scale, 80.4 mg, 78%) by filtration and trituration (ethyl acetate/petroleum ether = 1:20): m.p. 180.1 °C (decomposition); <sup>1</sup>H NMR (500 MHz, CDCl<sub>3</sub>) δ 8.18 (d, *J* = 7.7 Hz, 2 H), 7.74 (t, *J* = 7.5 Hz, 1 H), 7.65 (t, *J* = 7.7 Hz, 2 H), 7.02 (d, *J* = 7.8 Hz, 2 H), 6.95 (d, *J* = 7.8 Hz, 2 H), 3.97 (s, 3 H), 3.71 (s, 1 H), 3.54 (s, 3 H), 2.27 (s, 3 H); <sup>13</sup>C NMR (126 MHz, CDCl<sub>3</sub>) δ 163.19, 162.22, 140.14, 139.86, 138.68, 134.43, 129.53, 129.45, 128.66, 126.68, 53.91, 53.53, 51.37, 45.07, 21.20, 6.79; HRMS calcd for C<sub>20</sub>H<sub>19</sub>INaO<sub>6</sub>S ([M+Na]<sup>+</sup>): 536.9839; found: 536.9839.

**(11) Dimethyl (2*R*\*,3*S*\*)-2-iodo-2-(4-(methoxycarbonyl)phenyl)-3-(phenylsulfonyl)cyclopropane-1,1-dicarboxylate (3l) (pcx-3-9).**

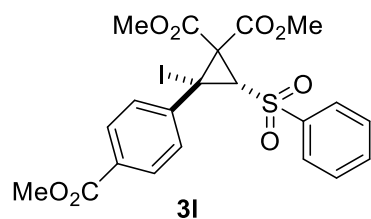

Following General Procedure I, after being stirred for 4.5 h, **3l** was afforded as a white solid (0.2 mmol scale, 100.8 mg, 90%) by filtration and trituration (ethyl acetate/petroleum ether = 1:20): m.p. 179.0-180.8 °C; <sup>1</sup>H NMR (500 MHz, DMSO-*d*<sub>6</sub>) δ 8.21 (d, *J* = 7.1 Hz, 2 H), 7.87 (d, *J* = 8.5 Hz, 2 H), 7.84 (d, *J* = 7.4 Hz, 1 H), 7.75 (t, *J* = 7.9 Hz, 2 H), 7.22 (d, *J* = 8.4 Hz, 2 H), 4.21 (s, 1 H), 3.83 (d, *J* = 5.6 Hz, 6 H), 3.43 (s, 3 H); <sup>13</sup>C NMR (126 MHz, DMSO-*d*<sub>6</sub>) δ 165.51, 163.00, 161.62, 147.80, 139.35,

134.79, 129.66, 129.60, 129.26, 128.49, 127.36, 54.11, 53.30, 52.35, 49.74, 44.22, 5.36;  
HRMS calcd for C<sub>21</sub>H<sub>19</sub>INaO<sub>8</sub>S ([M+Na]<sup>+</sup>): 580.9738; found: 580.9740.

**(12) Dimethyl (2*R*\*,3*S*\*)-2-iodo-2-(2-(methoxycarbonyl)phenyl)-3-(phenylsulfonyl)cyclopropane-1,1-dicarboxylate (3m) (pcx-5-33).**

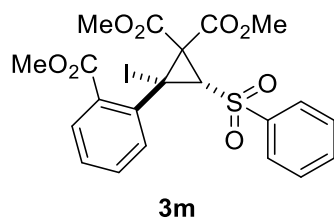

Following General Procedure I, after being stirred for 2 h, **3m** was afforded as a white solid (0.2 mmol scale, 70.7 mg, 63%) by filtration and trituration (ethyl acetate/petroleum ether = 1:20): m.p. 162.5-164.2 °C; <sup>1</sup>H NMR (500 MHz, CDCl<sub>3</sub>) δ 8.19 (d, *J* = 7.8 Hz, 2 H), 7.89 (d, *J* = 7.8 Hz, 1 H), 7.77 (t, *J* = 7.5 Hz, 1 H), 7.67 (t, *J* = 7.6 Hz, 2 H), 7.39 (t, *J* = 7.6 Hz, 1 H), 7.27 (t, *J* = 7.4 Hz, 1 H), 7.00 (d, *J* = 7.8 Hz, 1 H), 3.98 (d, *J* = 4.5 Hz, 6 H), 3.71 (s, 1 H), 3.56 (s, 3 H); <sup>13</sup>C NMR (126 MHz, CDCl<sub>3</sub>) δ 166.65, 164.06, 162.07, 142.95, 139.85, 134.54, 132.90, 131.79, 129.52, 129.33, 128.84, 128.68, 128.22, 54.05, 53.97, 53.28, 52.63, 44.79, 7.36; HRMS calcd for C<sub>21</sub>H<sub>19</sub>INaO<sub>8</sub>S ([M+Na]<sup>+</sup>): 580.9738; found: 580.9741.

**(13) Dimethyl (2*R*\*,3*S*\*)-2-(4-chlorophenyl)-2-iodo-3-(phenylsulfonyl)cyclopropane-1,1-dicarboxylate (3n) (pcx-3-47, pcx-11-9).**

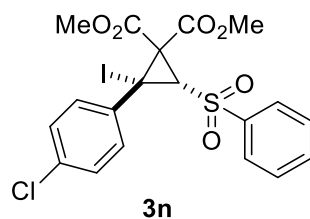

Following General Procedure I, after being stirred for 2 h, **3n** was afforded as a white solid (0.2 mmol scale, 96.6 mg, 90%) by filtration and trituration (ethyl acetate/petroleum ether = 1:20): m.p. 168.5-170.4 °C; <sup>1</sup>H NMR (500 MHz, CDCl<sub>3</sub>) δ 8.17 (d, *J* = 7.0 Hz, 2 H), 7.75 (t, *J* = 7.4 Hz, 1 H), 7.65 (t, *J* = 7.7 Hz, 2 H), 7.20 (d, *J* = 8.3 Hz, 2 H), 7.01 (d, *J* = 8.1 Hz, 2 H), 3.98 (s, 3 H), 3.68 (s, 1 H), 3.56 (s, 3 H); <sup>13</sup>C NMR (126 MHz, CDCl<sub>3</sub>) δ 163.07, 161.98, 141.57, 139.72, 134.58, 134.55, 129.54,

129.12, 128.64, 128.25, 54.09, 53.63, 51.30, 45.01, 5.56; HRMS calcd for  $C_{19}H_{16}^{35}ClINaO_6S$  ( $[M+Na]^+$ ): 556.9293; found: 556.9294.

**(14) Dimethyl (2*R*\*,3*S*\*)-2-(3-chlorophenyl)-2-iodo-3-(phenylsulfonyl)cyclopropane-1,1-dicarboxylate (3o) (pcx-4-2, pcx-11-10).**

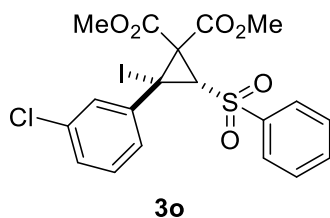

Following General Procedure I, after being stirred for 2 h, **3o** was afforded as a white solid (0.2 mmol scale, 101.8 mg, 95%) by filtration and trituration (ethyl acetate/petroleum ether = 1:20): m.p. 178.8-180.0 °C;  $^1H$  NMR (500 MHz,  $CDCl_3$ )  $\delta$  8.19-8.15 (m, 2 H), 7.76 (t,  $J$  = 7.5 Hz, 1 H), 7.66 (t,  $J$  = 7.8 Hz, 2 H), 7.17 (t,  $J$  = 7.8 Hz, 1 H), 7.14-7.10 (m, 1 H), 7.04 (s, 1 H), 6.96 (d,  $J$  = 7.6 Hz, 1 H), 3.98 (s, 3 H), 3.69 (s, 1 H), 3.57 (s, 3 H);  $^{13}C$  NMR (126 MHz,  $CDCl_3$ )  $\delta$  163.06, 161.93, 144.76, 139.68, 134.61, 134.39, 130.15, 129.55, 128.93, 128.64, 127.09, 125.05, 54.09, 53.65, 51.23, 44.96, 5.28; HRMS calcd for  $C_{19}H_{16}^{35}ClINaO_6S$  ( $[M+Na]^+$ ): 556.9293; found: 556.9290.

**(15) Dimethyl (2*R*\*,3*S*\*)-2-iodo-3-(phenylsulfonyl)-2-(4-(trifluoromethyl)phenyl)cyclopropane-1,1-dicarboxylate (3p) (pcx-3-46).**

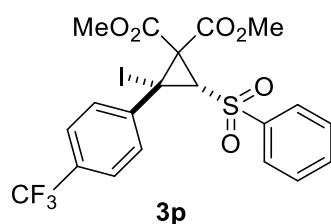

Following General Procedure I, after being stirred for 2.5 h, **3p** was afforded as a white solid (0.2 mmol scale, 104.7 mg, 92%) by filtration and trituration (ethyl acetate/petroleum ether = 1:20): m.p. 148.4 °C (decomposition);  $^1H$  NMR (500 MHz,  $CDCl_3$ )  $\delta$  8.18 (d,  $J$  = 7.1 Hz, 2 H), 7.76 (t,  $J$  = 7.5 Hz, 1 H), 7.66 (t,  $J$  = 7.8 Hz, 2 H), 7.49 (d,  $J$  = 8.2 Hz, 2 H), 7.17 (d,  $J$  = 8.0 Hz, 2 H), 3.99 (s, 3 H), 3.71 (s, 1 H), 3.56 (s, 3 H);  $^{13}C$  NMR (126 MHz,  $CDCl_3$ )  $\delta$  163.09, 161.91, 146.65, 139.65, 134.68, 130.68

(q,  $J = 32.7$  Hz), 129.60, 128.68, 127.35, 125.96 (q,  $J = 3.7$  Hz), 123.53 (q,  $J = 272.5$  Hz), 54.17, 53.71, 51.20, 44.84, 5.65;  $^{19}\text{F}$  NMR (471 MHz,  $\text{CDCl}_3$ )  $\delta$  -62.79; HRMS calcd for  $\text{C}_{20}\text{H}_{16}\text{F}_3\text{INaO}_6\text{S}$  ( $[\text{M}+\text{Na}]^+$ ): 590.9557; found: 590.9559.

**(16) Dimethyl (2*R*\*,3*S*\*)-3-((4-bromophenyl)sulfonyl)-2-iodo-2-phenylcyclopropane-1,1-dicarboxylate (3q) (pcx-2-43).**

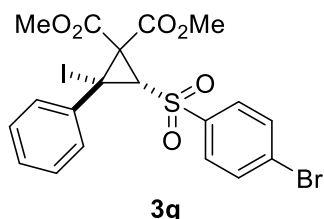

Following General Procedure I, after being stirred overnight, **3q** was afforded as a white solid (0.2 mmol scale, 115.1 mg, 99%) by filtration and trituration (ethyl acetate/petroleum ether = 1:20): m.p. 165.5-167.3 °C;  $^1\text{H}$  NMR (500 MHz,  $\text{CDCl}_3$ )  $\delta$  8.04 (d,  $J = 8.7$  Hz, 2 H), 7.78 (d,  $J = 8.6$  Hz, 2 H), 7.24 (t,  $J = 8.6$  Hz, 2 H), 7.16 (t,  $J = 7.4$  Hz, 1 H), 7.09 (d,  $J = 7.0$  Hz, 2 H), 3.97 (s, 3 H), 3.73 (s, 1 H), 3.52 (s, 3 H);  $^{13}\text{C}$  NMR (126 MHz,  $\text{CDCl}_3$ )  $\delta$  163.03, 162.06, 142.82, 138.78, 132.85, 130.23, 130.02, 128.92, 128.80, 126.82, 54.00, 53.62, 51.33, 45.20, 6.45; HRMS calcd for  $\text{C}_{19}\text{H}_{16}^{79}\text{BrINaO}_6\text{S}$  ( $[\text{M}+\text{Na}]^+$ ): 600.8788; found: 600.8790.

**(17) Dimethyl (2*R*\*,3*S*\*)-3-((4-bromophenyl)sulfonyl)-2-iodo-2-(*p*-tolyl)cyclopropane-1,1-dicarboxylate (3r) (pcx-2-50).**

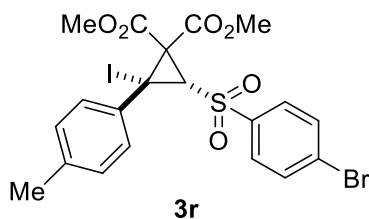

Following General Procedure I, after being stirred for 4 h, **3r** was afforded as a white solid (0.2 mmol scale, 103.6 mg, 87%) by filtration and trituration (ethyl acetate/petroleum ether = 1:20): m.p. 199.1-200.7 °C;  $^1\text{H}$  NMR (500 MHz,  $\text{CDCl}_3$ )  $\delta$  8.03 (d,  $J = 8.4$  Hz, 2 H), 7.78 (d,  $J = 8.3$  Hz, 2 H), 7.04 (d,  $J = 7.9$  Hz, 2 H), 6.98 (d,  $J = 7.8$  Hz, 2 H), 3.97 (s, 3 H), 3.70 (s, 1 H), 3.54 (s, 3 H), 2.29 (s, 3 H);  $^{13}\text{C}$  NMR (126 MHz,  $\text{DMSO}-d_6$ )  $\delta$  162.86, 161.68, 140.06, 138.62, 137.78, 132.66, 130.54, 129.21,

129.03, 126.79, 53.96, 53.24, 49.77, 44.50, 20.67, 5.75; HRMS calcd for  $C_{20}H_{18}^{79}BrINaO_6S$  ( $[M+Na]^+$ ): 614.8944; found: 614.8944.

**(18) Dimethyl (2*R*\*,3*S*\*)-3-((4-bromophenyl)sulfonyl)-2-iodo-2-(4-(methoxycarbonyl)phenyl)cyclopropane-1,1-dicarboxylate (3s) (pcx-3-10).**

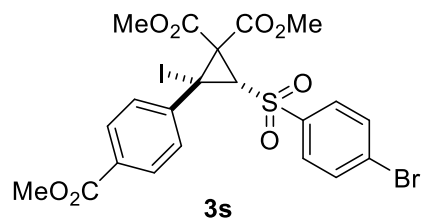

Following General Procedure I, after being stirred for 3.5 h, **3s** was afforded as a white solid (0.2 mmol scale, 111.3 mg, 87%) by filtration and trituration (ethyl acetate/petroleum ether = 1:20): m.p. 202.4-204.2 °C;  $^1H$  NMR (500 MHz,  $CDCl_3$ )  $\delta$  8.03 (d,  $J$  = 8.2 Hz, 2 H), 7.92 (d,  $J$  = 8.0 Hz, 2 H), 7.79 (d,  $J$  = 8.2 Hz, 2 H), 7.16 (d,  $J$  = 8.0 Hz, 2 H), 3.98 (s, 3 H), 3.88 (s, 3 H), 3.70 (s, 1 H), 3.54 (s, 3 H);  $^{13}C$  NMR (126 MHz,  $DMSO-d_6$ )  $\delta$  165.53, 162.91, 161.58, 147.67, 138.54, 132.71, 130.56, 129.66, 129.28, 129.15, 127.45, 54.13, 53.35, 52.37, 49.53, 44.31, 5.20; HRMS calcd for  $C_{21}H_{18}^{79}BrINaO_8S$  ( $[M+Na]^+$ ): 658.8843; found: 658.8843.

**(19) Dimethyl (2*R*\*,3*S*\*)-3-((4-chlorophenyl)sulfonyl)-2-iodo-2-(*p*-tolyl)cyclopropane-1,1-dicarboxylate (3t) (pcx-3-2).**

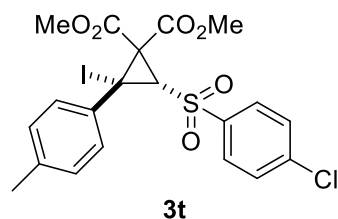

Following General Procedure I, after being stirred for 2 h, **3t** was afforded as a white solid (0.2 mmol scale, 89.0 mg, 81%) by filtration and trituration (ethyl acetate/petroleum ether = 1:20): m.p. 195.5 °C (decomposition);  $^1H$  NMR (500 MHz,  $DMSO-d_6$ )  $\delta$  8.22 (d,  $J$  = 8.7 Hz, 2 H), 7.83 (d,  $J$  = 8.6 Hz, 2 H), 7.09 (d,  $J$  = 8.0 Hz, 2 H), 6.98 (d,  $J$  = 8.2 Hz, 2 H), 4.19 (s, 1 H), 3.81 (s, 3 H), 3.44 (s, 3 H), 2.25 (s, 3 H);  $^{13}C$  NMR (126 MHz,  $DMSO-d_6$ )  $\delta$  162.87, 161.69, 140.07, 139.83, 138.20, 137.78,

130.55, 129.72, 129.22, 126.79, 53.97, 53.25, 49.81, 44.51, 20.68, 5.80; HRMS calcd for  $C_{20}H_{18}^{35}ClINaO_6S$  ( $[M+Na]^+$ ): 570.9450; found: 570.9447.

**(20) Dimethyl (2*R*\*,3*S*\*)-3-((4-chlorophenyl)sulfonyl)-2-iodo-2-(4-(methoxycarbonyl)phenyl)cyclopropane-1,1-dicarboxylate (3u) (pcx-3-11).**

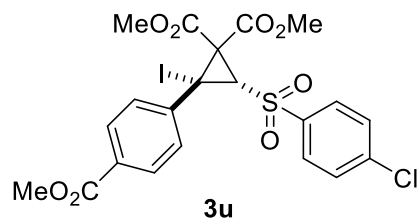

Following General Procedure I, after being stirred for 2 h, **3u** was afforded as a white solid (0.2 mmol scale, 115.4 mg, 97%) by filtration and trituration (ethyl acetate/petroleum ether = 1:20): m.p. 185.4-186.5 °C;  $^1H$  NMR (500 MHz, DMSO- $d_6$ )  $\delta$  8.23 (d,  $J$  = 8.7 Hz, 2 H), 7.89 (d,  $J$  = 8.5 Hz, 2 H), 7.84 (d,  $J$  = 8.7 Hz, 2 H), 7.25 (d,  $J$  = 8.5 Hz, 2 H), 4.36 (s, 1 H), 3.83 (s, 6 H), 3.43 (s, 3 H);  $^{13}C$  NMR (126 MHz, DMSO- $d_6$ )  $\delta$  165.53, 162.91, 161.59, 147.67, 139.92, 138.11, 130.57, 129.76, 129.66, 129.28, 127.44, 54.13, 53.35, 52.37, 49.57, 44.31, 5.24; HRMS calcd for  $C_{21}H_{18}^{35}ClINaO_8S$  ( $[M+Na]^+$ ): 614.9348; found: 614.9352.

**(21) Diethyl (2*R*\*,3*S*\*)-2-iodo-2-phenyl-3-(phenylsulfonyl)cyclopropane-1,1-dicarboxylate (3v) (pcx-5-42).**

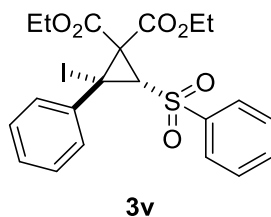

Following General Procedure I, after being stirred for 2 h, **3v** was afforded as a white solid (0.2 mmol scale, 80.4 mg, 76%) by filtration and trituration (ethyl acetate/petroleum ether = 1:20): m.p. 126.8-128.0 °C;  $^1H$  NMR (500 MHz,  $CDCl_3$ )  $\delta$  8.20 (d,  $J$  = 7.7 Hz, 2 H), 7.74 (t,  $J$  = 7.5 Hz, 1 H), 7.65 (t,  $J$  = 7.7 Hz, 2 H), 7.21 (t,  $J$  = 7.6 Hz, 2 H), 7.14 (t,  $J$  = 7.2 Hz, 1 H), 7.07 (d,  $J$  = 7.6 Hz, 2 H), 4.55-4.38 (m, 2 H), 4.04-3.90 (m, 2 H), 3.73 (s, 1 H), 1.42 (t,  $J$  = 7.1 Hz, 3 H), 1.05 (t,  $J$  = 7.2 Hz, 3H);  $^{13}C$  NMR (126 MHz,  $CDCl_3$ )  $\delta$  162.73, 161.74, 143.14, 140.05, 134.40, 129.45, 128.77,

128.69, 128.62, 127.02, 63.26, 62.96, 51.27, 45.00, 13.93, 13.80, 7.01; HRMS calcd for C<sub>21</sub>H<sub>21</sub>INaO<sub>6</sub>S ([M+Na]<sup>+</sup>): 550.9996; found: 550.9997.

**(22) Di-*tert*-butyl (2*R*\*,3*S*\*)-2-iodo-2-phenyl-3-tosylcyclopropane-1,1-dicarboxylate (3w) (pcx-3-32).**

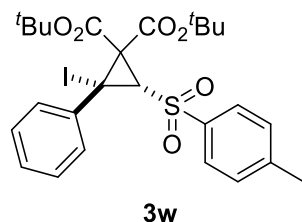

Following General Procedure I, after being stirred for 2.5 h, **3w** was afforded as a white solid (0.15 mmol scale, 67.5 mg, 75%) by filtration and trituration (ethyl acetate/petroleum ether = 1:20): m.p. 160.7-161.9 °C; <sup>1</sup>H NMR (500 MHz, CDCl<sub>3</sub>) δ 8.09 (d, *J* = 8.3 Hz, 2 H), 7.42 (d, *J* = 8.1 Hz, 2 H), 7.19 (t, *J* = 7.5 Hz, 2 H), 7.11 (t, *J* = 7.4 Hz, 1 H), 7.05 (d, *J* = 7.5 Hz, 2 H), 3.62 (s, 1 H), 2.49 (s, 3 H), 1.63 (s, 9 H), 1.28 (s, 9 H); <sup>13</sup>C NMR (126 MHz, CDCl<sub>3</sub>) δ 161.64, 160.58, 145.25, 143.28, 137.52, 130.00, 128.61, 128.57, 128.41, 127.35, 84.29, 83.91, 50.99, 45.98, 27.90, 27.73, 21.85, 7.77; HRMS calcd for C<sub>26</sub>H<sub>31</sub>INaO<sub>6</sub>S ([M+Na]<sup>+</sup>): 621.0778; found: 621.0778.

## 2. Iodosulfonylation of styrenes.

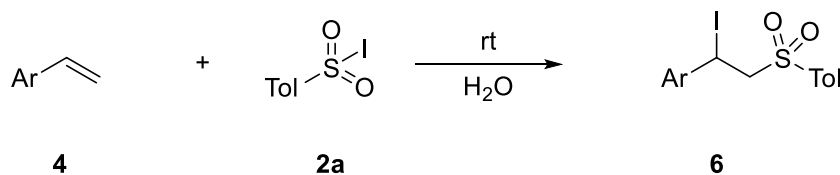

**General Procedure II:** To a 10 mL reaction tube equipped with a stirring bar was added **4** (1.0 equiv), **2a** (1.2 equiv), and H<sub>2</sub>O (*c* = 0.1 mol/L for **4**) successively, and the tube was sealed with a septum. The mixture was stirred at room temperature overnight until completion of the reaction. In case that a solid was formed, filtration was performed to give the crude product. Otherwise the mixture was extracted with ethyl acetate (5 mL × 3), washed with brine (5 mL), dried over anhydrous MgSO<sub>4</sub>, filtered and concentrated in vacuo to give the crude product. Further recrystallization of the

crude product with a mixture of ethyl acetate and petroleum ether afforded the pure product.

**(1) Methyl 4-(1-iodo-2-tosylethyl)benzoate (6a) (pcx-9-44).**

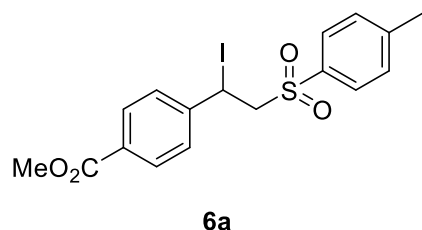

Following General Procedure II, **6a** was afforded as a white solid (0.2 mmol scale, 89.9 mg, >99%) by extraction with ethyl acetate and recrystallization (ethyl acetate/petroleum ether = 1:20): m.p. 103.4-104.7 °C; <sup>1</sup>H NMR (500 MHz, CDCl<sub>3</sub>) δ 7.76 (d, *J* = 8.4 Hz, 2 H), 7.42 (d, *J* = 8.3 Hz, 2 H), 7.26 (d, *J* = 8.4 Hz, 2 H), 7.10 (d, *J* = 7.5 Hz, 2 H), 5.53 (dd, *J* = 11.5, 4.1 Hz, 1 H), 4.28 (dd, *J* = 14.7, 11.5 Hz, 1 H), 4.04 (dd, *J* = 14.6, 4.0 Hz, 1 H), 3.90 (s, 3 H), 2.34 (s, 3 H); <sup>13</sup>C NMR (126 MHz, CDCl<sub>3</sub>) δ 166.27, 145.32, 145.09, 135.87, 130.05, 129.99, 129.80, 128.03, 127.22, 65.48, 52.31, 21.57, 16.41; HRMS calcd for C<sub>17</sub>H<sub>17</sub>INaO<sub>4</sub>S ([M+Na]<sup>+</sup>): 466.9784; found: 466.9783.

**(2) Methyl 3-(1-iodo-2-tosylethyl)benzoate (6b) (pcx-10-44).**

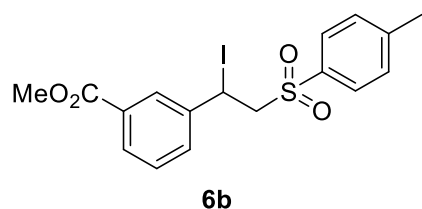

Following General Procedure II, **6b** was afforded as a white solid (0.2 mmol scale, 69.1 mg, 79%) by filtration and recrystallization (ethyl acetate/petroleum ether = 1:20): m.p. 128.2 °C (decomposition); <sup>1</sup>H NMR (500 MHz, CDCl<sub>3</sub>) δ 7.80 (d, *J* = 7.8 Hz, 1 H), 7.77 (s, 1 H), 7.43 (d, *J* = 7.9 Hz, 1 H), 7.39 (d, *J* = 8.4 Hz, 2 H), 7.23 (t, *J* = 7.8 Hz, 1 H), 7.08 (d, *J* = 8.0 Hz, 2 H), 5.56 (dd, *J* = 11.6, 4.0 Hz, 1 H), 4.34 (dd, *J* = 14.7, 11.6 Hz, 1 H), 4.06 (dd, *J* = 14.7, 4.0 Hz, 1 H), 3.89 (s, 3 H), 2.32 (s, 3 H); <sup>13</sup>C NMR (126 MHz, CDCl<sub>3</sub>) δ 166.00, 144.80, 140.93, 136.02, 131.62, 130.72, 129.77, 129.52, 128.91, 128.19, 127.95, 65.53, 52.31, 21.54, 16.71; HRMS calcd for C<sub>17</sub>H<sub>17</sub>INaO<sub>4</sub>S ([M+Na]<sup>+</sup>): 466.9784; found: 466.9873.

**(3) Methyl 2-(1-iodo-2-tosylethyl)benzoate (6c) (pcx-10-43).**

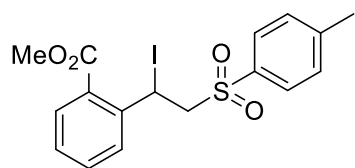

**6c**

Following General Procedure II, **6c** was afforded as a white solid (0.2 mmol scale, 78.4 mg, 73%) by filtration and recrystallization (ethyl acetate/petroleum ether = 1:20): m.p. 85.4-86.6 °C; <sup>1</sup>H NMR (500 MHz, CDCl<sub>3</sub>) δ 7.78 (d, *J* = 7.8 Hz, 1 H), 7.47 (d, *J* = 8.3 Hz, 3 H), 7.28 (td, *J* = 7.6, 1.6 Hz, 1 H), 7.23 (td, *J* = 7.6, 1.3 Hz, 1 H), 7.16 (d, *J* = 8.0 Hz, 2 H), 6.72 (s, 1 H), 4.36 (t, *J* = 13.2 Hz, 1 H), 4.07 (dd, *J* = 14.7, 4.3 Hz, 1 H), 3.94 (s, 3 H), 2.38 (s, 3 H); <sup>13</sup>C NMR (126 MHz, CDCl<sub>3</sub>) δ 167.12, 144.82, 141.96, 135.96, 132.52, 130.92, 129.84, 129.10, 128.12, 128.05, 65.66, 52.56, 21.67, 13.21; HRMS calcd for C<sub>17</sub>H<sub>17</sub>INaO<sub>4</sub>S ([M+Na]<sup>+</sup>): 466.9784; found: 466.9785.

**(4) 4-(1-Iodo-2-tosylethyl)benzonitrile (6d) (pcx-11-50).**

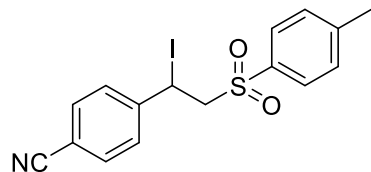

**6d**

Following General Procedure II, **6d** was afforded as a white solid (0.2 mmol scale, 70.6 mg, 86%) by extraction with ethyl acetate and recrystallization (ethyl acetate/petroleum ether = 1:20): m.p. 118.8 °C (decomposition); <sup>1</sup>H NMR (500 MHz, CDCl<sub>3</sub>) δ 7.46 (d, *J* = 8.1 Hz, 2 H), 7.43 (d, *J* = 7.8 Hz, 2 H), 7.34 (d, *J* = 8.0 Hz, 2 H), 7.19 (d, *J* = 7.9 Hz, 2 H), 5.51 (dd, *J* = 11.6, 3.9 Hz, 1 H), 4.24 (dd, *J* = 14.6, 11.7 Hz, 1 H), 4.02 (dd, *J* = 14.6, 4.0 Hz, 1 H), 2.41 (s, 3 H); <sup>13</sup>C NMR (126 MHz, CDCl<sub>3</sub>) δ 145.74, 145.44, 135.89, 132.47, 129.96, 128.02, 118.13, 112.15, 65.28, 21.69, 15.25; HRMS calcd for C<sub>16</sub>H<sub>14</sub>INNaO<sub>2</sub>S ([M+Na]<sup>+</sup>): 433.9682; found: 433.9686.

**(5) 1-((2-Iodo-2-(4-(trifluoromethyl)phenyl)ethyl)sulfonyl)-4-methylbenzene (6e) (pcx-10-29).**

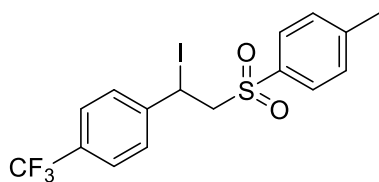

**6e**

Following General Procedure II, **6e** was afforded as a white solid (0.2 mmol scale, 72.6 mg, 81%) by extraction with ethyl acetate and recrystallization (ethyl acetate/petroleum ether = 1:20): m.p. 132.0-134.0 °C;  $^1\text{H}$  NMR (500 MHz,  $\text{CDCl}_3$ )  $\delta$  7.35 (d,  $J$  = 8.4 Hz, 2 H), 7.32 (d,  $J$  = 8.4 Hz, 2 H), 7.28 (d,  $J$  = 8.3 Hz, 2 H), 7.07 (d,  $J$  = 8.0 Hz, 2 H), 5.55 (dd,  $J$  = 11.9, 3.8 Hz, 1 H), 4.30 (dd,  $J$  = 14.7, 11.9 Hz, 1 H), 4.06 (dd,  $J$  = 14.8, 3.8 Hz, 1 H), 2.34 (s, 3 H);  $^{13}\text{C}$  NMR (126 MHz,  $\text{CDCl}_3$ )  $\delta$  145.06, 144.28, 135.91, 130.42 (q,  $J$  = 32.7 Hz), 129.77, 127.93, 127.63, 125.65 (q,  $J$  = 3.7 Hz), 123.71 (q,  $J$  = 272.1 Hz), 65.58, 21.44, 15.92;  $^{19}\text{F}$  NMR (471 MHz,  $\text{CDCl}_3$ )  $\delta$  -62.85; HRMS calcd for  $\text{C}_{16}\text{H}_{14}\text{F}_3\text{INaO}_2\text{S}$  ( $[\text{M}+\text{Na}]^+$ ): 476.9603; found: 476.9604.

**(6) 1-Fluoro-4-(1-iodo-2-tosylethyl)benzene (6f) (pcx-10-28).**

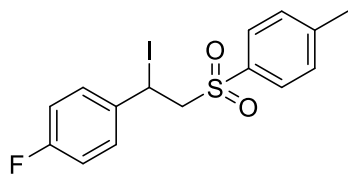

**6f**

Following General Procedure II, **6f** was afforded as a white solid (0.2 mmol scale, 63.3 mg, 73%) by filtration and recrystallization (ethyl acetate/petroleum ether = 1:20): m.p. 122.6-123.3 °C;  $^1\text{H}$  NMR (500 MHz,  $\text{CDCl}_3$ )  $\delta$  7.43 (d,  $J$  = 8.4 Hz, 2 H), 7.20 (dd,  $J$  = 8.8, 5.1 Hz, 2 H), 7.16 (d,  $J$  = 8.0 Hz, 2 H), 6.80 (t,  $J$  = 8.6 Hz, 2 H), 5.54 (dd,  $J$  = 11.6, 4.1 Hz, 1 H), 4.25 (dd,  $J$  = 14.6, 11.5 Hz, 1 H), 4.04 (dd,  $J$  = 14.6, 4.1 Hz, 1 H), 2.39 (s, 3 H);  $^{13}\text{C}$  NMR (126 MHz,  $\text{CDCl}_3$ )  $\delta$  162.35 (d,  $J$  = 249.3 Hz), 144.96, 136.55 (d,  $J$  = 3.2 Hz), 136.16, 129.78, 129.07 (d,  $J$  = 8.3 Hz), 128.03, 115.75 (d,  $J$  = 21.9 Hz), 66.19, 21.63, 17.09;  $^{19}\text{F}$  NMR (471 MHz,  $\text{CDCl}_3$ )  $\delta$  -112.10; HRMS calcd for  $\text{C}_{15}\text{H}_{14}\text{FINaO}_2\text{S}$  ( $[\text{M}+\text{Na}]^+$ ): 426.9635; found: 426.9638.

**(7) 1-Bromo-4-(1-iodo-2-tosylethyl)benzene (6g) (pcx-10-30).**

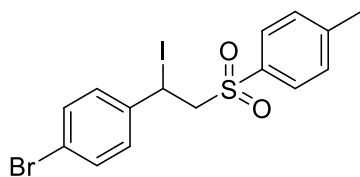

**6g**

Following General Procedure II, **6g** was afforded as a white solid (0.2 mmol scale, 82.1 mg, 87%) by extraction with ethyl acetate and recrystallization (ethyl acetate/petroleum ether = 1:20): m.p. 107.1-108.5 °C;  $^1\text{H}$  NMR (500 MHz,  $\text{CDCl}_3$ )  $\delta$  7.39 (d,  $J = 8.3$  Hz, 2 H), 7.20 (d,  $J = 8.5$  Hz, 2 H), 7.14 (d,  $J = 8.0$  Hz, 2 H), 7.05 (d,  $J = 8.5$  Hz, 2 H), 5.48 (dd,  $J = 11.7, 3.9$  Hz, 1 H), 4.25 (dd,  $J = 14.6, 11.7$  Hz, 1 H), 4.02 (dd,  $J = 14.6, 4.0$  Hz, 1 H), 2.41 (s, 3 H);  $^{13}\text{C}$  NMR (126 MHz,  $\text{CDCl}_3$ )  $\delta$  145.07, 139.49, 131.84, 129.80, 128.80, 127.98, 122.51, 65.84, 21.71, 16.79; HRMS calcd for  $\text{C}_{15}\text{H}_{14}^{79}\text{BrINaO}_2\text{S}$  ( $[\text{M}+\text{Na}]^+$ ): 486.8835; found: 486.8835.

### 3. Iodosulfonylation of alkynes.

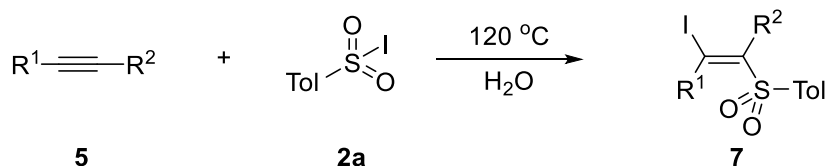

**General Procedure III:** To a 10 mL reaction tube equipped with a stirring bar was added **5** (1.0 equiv), **2a** (1.2 equiv), and  $\text{H}_2\text{O}$  ( $c = 0.1$  mol/L for **5**) successively, and the tube was sealed with a septum. The mixture was stirred at 120 °C for indicated time until completion of the reaction. In case that a solid was formed, filtration was performed to give the crude product. Otherwise the mixture was extracted with ethyl acetate (5 mL  $\times$  3), washed with brine (5 mL), dried over anhydrous  $\text{MgSO}_4$ , filtered and concentrated in vacuo to give the crude product. Further recrystallization of the crude product with a mixture of ethyl acetate and petroleum ether afforded the pure product unless otherwise stated.

#### (1) (*E*)-1-((2-Iodo-2-phenylvinyl)sulfonyl)-4-methylbenzene (**7a**) (pcx-9-33).

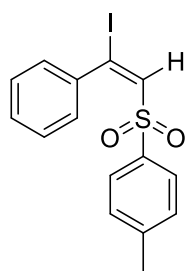

**7a**

Following General Procedure III, after being stirred for 3.5 h, **7a** was afforded as a white solid (0.2 mmol scale, 61.4 mg, 77%) by extraction with ethyl acetate and recrystallization (ethyl acetate/petroleum ether = 1:20): m.p. 80.7-82.1 °C; <sup>1</sup>H NMR (500 MHz, CDCl<sub>3</sub>) δ 7.46 (d, *J* = 8.4 Hz, 2 H), 7.36 (s, 1 H), 7.34-7.26 (m, 3 H), 7.24-7.21 (m, 2 H), 7.19 (d, *J* = 8.0 Hz, 2 H), 2.39 (s, 3 H); <sup>13</sup>C NMR (126 MHz, CDCl<sub>3</sub>) δ 144.63, 141.33, 139.73, 137.39, 129.85, 129.73, 127.98, 127.95, 127.77, 114.23, 21.71; HRMS calcd for C<sub>15</sub>H<sub>13</sub>INaO<sub>2</sub>S ([M+Na]<sup>+</sup>): 406.9573; found: 406.9572.

**(2) (E)-4-(1-Iodo-2-tosylvinyl)benzonitrile (7b) (pcx-10-2).**

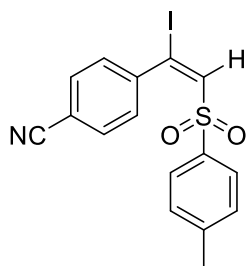

**7b**

Following General Procedure III, after being stirred for 2 h, **7b** was afforded as a white solid (0.2 mmol scale, 60.6 mg, 73%) by filtration and recrystallization (ethyl acetate/petroleum ether = 1:20): m.p. 188.1 °C (decomposition); <sup>1</sup>H NMR (500 MHz, CDCl<sub>3</sub>) δ 7.62 (d, *J* = 8.5 Hz, 2 H), 7.52 (d, *J* = 8.4 Hz, 2 H), 7.38-7.33 (m, 3 H), 7.27 (d, *J* = 8.0 Hz, 2 H), 2.43 (s, 3H); <sup>13</sup>C NMR (126 MHz, CDCl<sub>3</sub>) δ 145.38, 144.19, 142.36, 136.92, 131.81, 130.10, 128.33, 127.92, 118.08, 113.42, 109.86, 21.78; HRMS calcd for C<sub>16</sub>H<sub>14</sub>INNaO<sub>2</sub>S ([M+Na]<sup>+</sup>): 431.9526; found: 431.9523.

**(3) Methyl (E)-4-(1-iodo-2-tosylvinyl)benzoate (7c) (pcx-9-28).**

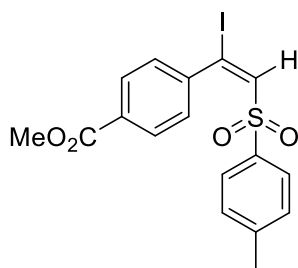

**7c**

Following General Procedure III, after being stirred for 2 h, **7c** was afforded as a white solid (0.2 mmol scale, 65.6 mg, 73%) by filtration and recrystallization (ethyl acetate/petroleum ether = 1:20): m.p. 158.1-160.0 °C; <sup>1</sup>H NMR (500 MHz, CDCl<sub>3</sub>) δ 7.97 (d, *J* = 8.0 Hz, 2 H), 7.49 (d, *J* = 7.8 Hz, 2 H), 7.37 (s, 1 H), 7.29 (d, *J* = 8.0 Hz, 2 H), 7.22 (d, *J* = 7.9 Hz, 2 H), 3.94 (s, 3 H), 2.41 (s, 3 H); <sup>13</sup>C NMR (126 MHz, CDCl<sub>3</sub>) δ 166.24, 145.06, 144.07, 141.91, 137.18, 131.08, 129.94, 129.26, 127.97, 127.64, 111.93, 52.44, 21.74; HRMS calcd for C<sub>17</sub>H<sub>15</sub>INaO<sub>4</sub>S ([M+Na]<sup>+</sup>): 464.9628; found: 464.9627.

**(4) (E)-1-((2-Iodo-2-(4-(trifluoromethyl)phenyl)vinyl)sulfonyl)-4-methylbenzene (7d) (pcx-10-7, pcx-10-39).**

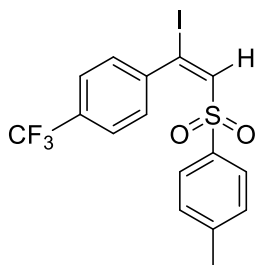

**7d**

Following General Procedure III, after being stirred for 3 h, **7d** was afforded as a white solid (0.2 mmol scale, 53.9 mg, 57%) by filtration and recrystallization (ethyl acetate/petroleum ether = 1:20): m.p. 145.8-146.9 °C; <sup>1</sup>H NMR (500 MHz, CDCl<sub>3</sub>) δ 7.54 (d, *J* = 8.1 Hz, 2 H), 7.47 (d, *J* = 8.3 Hz, 2 H), 7.40 (s, 1 H), 7.32 (d, *J* = 8.0 Hz, 2 H), 7.21 (d, *J* = 8.0 Hz, 2 H), 2.40 (s, 3 H); <sup>13</sup>C NMR (126 MHz, CDCl<sub>3</sub>) δ 145.11, 143.19, 142.55, 136.94, 131.51 (q, *J* = 33.0 Hz), 129.91, 128.01, 127.97, 125.05 (q, *J* = 3.8 Hz), 123.64 (q, *J* = 272.9 Hz), 110.75, 21.69; <sup>19</sup>F NMR (471 MHz, CDCl<sub>3</sub>) δ -62.91; HRMS calcd for C<sub>16</sub>H<sub>12</sub>F<sub>3</sub>INaO<sub>2</sub>S ([M+Na]<sup>+</sup>): 474.9447; found: 474.9447.

**(5) (E)-1-((2-Iodo-2-(4-methylphenyl)vinyl)sulfonyl)-4-methylbenzene (7e) (pcx-10-40).**

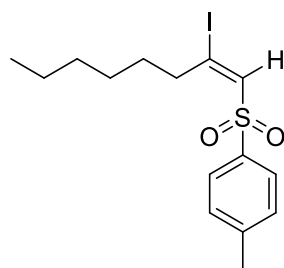

**7e**

Following General Procedure III, after being stirred for 2 h, **7e** was afforded as a white solid (0.2 mmol scale, 41.8 mg, 52%) by extraction with ethyl acetate and chromatography on silica gel (0-8% ethyl acetate in petroleum ether): m.p. 51.5-52.9 °C;  $^1\text{H}$  NMR (500 MHz,  $\text{CDCl}_3$ )  $\delta$  7.78 (d,  $J = 8.3$  Hz, 2 H), 7.35 (d,  $J = 8.0$  Hz, 2 H), 7.00 (s, 1 H), 3.01 (t,  $J = 7.5$  Hz, 2 H), 2.44 (s, 3 H), 1.55-1.47 (m, 2 H), 1.34-1.26 (m, 6 H), 0.88 (d,  $J = 7.0$  Hz, 3 H);  $^{13}\text{C}$  NMR (126 MHz,  $\text{CDCl}_3$ )  $\delta$  144.88, 138.98, 138.16, 130.16, 127.58, 125.83, 40.06, 31.59, 29.92, 28.23, 22.56, 21.75, 14.12; HRMS calcd for  $\text{C}_{15}\text{H}_{21}\text{INaO}_2\text{S}$  ( $[\text{M}+\text{Na}]^+$ ): 415.0199; found: 415.0200.

**(6) (E)-(1-Iodo-2-tosylethene-1,2-diyl)dibenzene (7f) (pcx-9-34).**

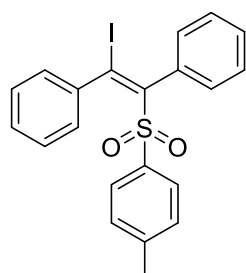

**7f**

Following General Procedure III, after being stirred for 2 h, **7f** was afforded as a white solid (0.2 mmol scale, 68.7 mg, 74%) by filtration and recrystallization (ethyl acetate/petroleum ether = 1:20): m.p. 188.5-190.2 °C;  $^1\text{H}$  NMR (500 MHz,  $\text{CDCl}_3$ )  $\delta$  7.44-7.30 (m, 8 H), 7.26 (d,  $J = 8.1$  Hz, 2 H), 7.17 (d,  $J = 7.2$  Hz, 2 H), 7.10 (d,  $J = 7.9$  Hz, 2 H), 2.37 (s, 3 H);  $^{13}\text{C}$  NMR (126 MHz,  $\text{CDCl}_3$ )  $\delta$  149.15, 144.32, 142.59, 139.45, 136.84, 130.36, 129.27, 129.07, 128.62, 128.40, 127.93, 127.44, 118.13, 21.70; HRMS calcd for  $\text{C}_{21}\text{H}_{17}\text{INaO}_2\text{S}$  ( $[\text{M}+\text{Na}]^+$ ): 482.9886; found: 482.9884.

**(7) (E)-3-Iodo-1,3-diphenyl-2-tosylprop-2-en-1-one (7g) (pcx-9-31).**

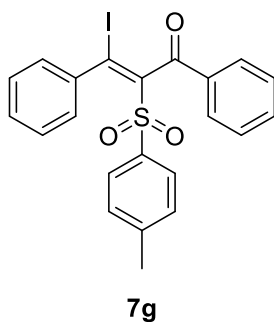

Following General Procedure III, after being stirred for 2 h, **7g** was afforded as a white solid (0.2 mmol scale, 54.8 mg, 55%) by extraction with ethyl acetate and recrystallization (ethyl acetate/petroleum ether = 1:20): m.p. 117.3-118.9 °C; <sup>1</sup>H NMR (500 MHz, CDCl<sub>3</sub>) δ 8.24 (d, *J* = 7.3 Hz, 2 H), 7.70 (t, *J* = 7.4 Hz, 1 H), 7.60 (t, *J* = 7.7 Hz, 2 H), 7.33 (d, *J* = 8.3 Hz, 2 H), 7.32-7.26 (m, 3 H), 7.18 (d, *J* = 7.2 Hz, 2 H), 7.12 (d, *J* = 8.0 Hz, 2 H), 2.38 (s, 3 H); <sup>13</sup>C NMR (126 MHz, CDCl<sub>3</sub>) δ 190.71, 149.40, 144.95, 140.08, 137.44, 134.69, 133.88, 130.35, 129.61, 129.43, 129.27, 128.53, 127.99, 127.52, 113.82, 21.76; HRMS calcd for C<sub>22</sub>H<sub>17</sub>INaO<sub>3</sub>S ([M+Na]<sup>+</sup>): 510.9835; found: 510.9831.

**(8) Methyl (*E*)-3-iodo-3-phenyl-2-tosylacrylate (**7h**) (pcx-9-21).**

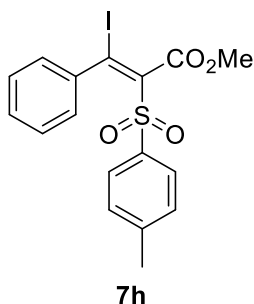

Following General Procedure III, after being stirred for 2.5 h, **7h** was afforded as a white solid (0.2 mmol scale, 71.4 mg, 80%) by extraction with ethyl acetate and recrystallization (ethyl acetate/petroleum ether = 1:20): m.p. 126.6-128.4 °C; <sup>1</sup>H NMR (500 MHz, CDCl<sub>3</sub>) δ 7.31 (d, *J* = 8.0 Hz, 2 H), 7.27 (d, *J* = 7.1 Hz, 1 H), 7.22 (t, *J* = 7.5 Hz, 2 H), 7.11 (d, *J* = 8.0 Hz, 2 H), 7.05 (d, *J* = 7.6 Hz, 2 H), 3.96 (s, 3 H), 2.37 (s, 3H); <sup>13</sup>C NMR (126 MHz, CDCl<sub>3</sub>) δ 164.10, 146.53, 144.93, 139.45, 136.99, 129.63, 129.35, 128.18, 127.80, 127.25, 114.44, 53.72, 21.64; HRMS calcd for C<sub>17</sub>H<sub>15</sub>INaO<sub>4</sub>S ([M+Na]<sup>+</sup>): 464.9628; found: 464.9627.

**(9) Methyl (*E*)-4-(4-hydroxy-1-iodo-2-tosylbut-1-en-1-yl)benzoate (**7i**) (pcx-10-15).**

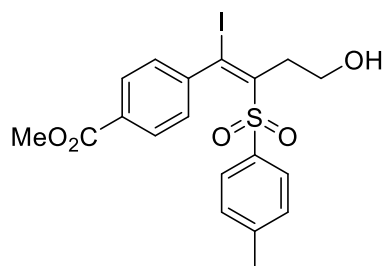

**7i**

Following General Procedure III, after being stirred for 2 h, **7i** was afforded as a white solid (0.2 mmol scale, 80.8 mg, 84%): by extraction with ethyl acetate and recrystallization (ethyl acetate/petroleum ether = 1:20) m.p. 146.6 °C (decomposition);  $^1\text{H}$  NMR (500 MHz,  $\text{CDCl}_3$ )  $\delta$  7.83 (d,  $J$  = 8.3 Hz, 2 H), 7.32 (d,  $J$  = 8.4 Hz, 2 H), 7.09 (d,  $J$  = 8.1 Hz, 2 H), 7.07 (d,  $J$  = 8.4 Hz, 2 H), 4.05 (t,  $J$  = 6.5 Hz, 2 H), 3.93 (s, 3 H), 3.23 (t,  $J$  = 6.5 Hz, 2 H), 2.37 (s, 3 H), 1.25 (s, 1 H);  $^{13}\text{C}$  NMR (126 MHz,  $\text{CDCl}_3$ )  $\delta$  166.32, 146.96, 146.89, 144.69, 137.08, 130.08, 129.61, 128.98, 127.85, 127.68, 115.51, 61.00, 52.40, 42.15, 21.69; HRMS calcd for  $\text{C}_{19}\text{H}_{19}\text{INaO}_5\text{S}$  ( $[\text{M}+\text{Na}]^+$ ): 508.9890; found: 508.9889.

**(10) (E)-N-(4-Iodo-4-phenyl-3-tosylbut-3-en-1-yl)-4-methylbenzenesulfonamide (7j) (pcx-9-43).**

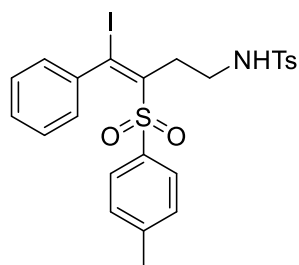

**7j**

Following General Procedure III, after being stirred for 2 h, **7j** was afforded as a white solid (0.2 mmol scale, 100.5 mg, 86%) by filtration and recrystallization (ethyl acetate/petroleum ether = 1:20): m.p. 192.4-193.0 °C;  $^1\text{H}$  NMR (500 MHz,  $\text{CDCl}_3$ )  $\delta$  7.84 (d,  $J$  = 8.4 Hz, 2 H), 7.35 (d,  $J$  = 8.0 Hz, 2 H), 7.24 (s, 1 H), 7.20-7.16 (m, 1 H), 7.16-7.09 (m, 2 H), 7.07 (d,  $J$  = 8.0 Hz, 2 H), 6.95-6.90 (m, 2 H), 5.16 (s, 1 H), 3.42 (q,  $J$  = 6.6 Hz, 2 H), 3.11 (t,  $J$  = 7.2 Hz, 2 H), 2.45 (s, 3 H), 2.36 (s, 3 H);  $^{13}\text{C}$  NMR (126 MHz,  $\text{CDCl}_3$ )  $\delta$  145.57, 144.31, 143.59, 142.42, 137.06, 136.94, 129.88, 129.53, 128.84,

127.83, 127.73, 127.58, 127.35, 118.35, 41.40, 39.32, 21.65; HRMS calcd for C<sub>24</sub>H<sub>24</sub>INNaO<sub>4</sub>S<sub>2</sub> ([M+Na]<sup>+</sup>): 604.0084; found: 604.0084.

**(11) (E)-1-((6-Iododec-5-en-5-yl)sulfonyl)-4-methylbenzene (7k) (pcx-10-9).**

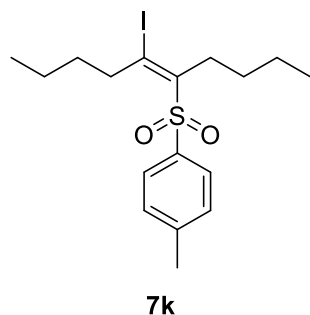

Following General Procedure III, after being stirred for 2 h, **7k** was afforded by extraction with ethyl acetate and chromatography on silica gel (0-8% ethyl acetate in petroleum ether) as a white solid (0.2 mmol scale, 34.5 mg, 40%): m.p. 52.3-53.6 °C; <sup>1</sup>H NMR (500 MHz, CDCl<sub>3</sub>) δ 7.74 (d, *J* = 7.8 Hz, 2 H), 7.33 (d, *J* = 8.0 Hz, 2 H), 3.13 (t, *J* = 7.7 Hz, 2 H), 2.59 (t, *J* = 8.3 Hz, 2 H), 2.44 (s, 3 H), 1.56-1.48 (m, 2 H), 1.46-1.38 (m, 2 H), 1.32 (tt, *J* = 15.2, 7.6 Hz, 4 H), 0.88 (q, *J* = 7.5 Hz, 6 H); <sup>13</sup>C NMR (126 MHz, CDCl<sub>3</sub>) δ 144.59, 144.42, 138.72, 129.90, 127.77, 127.39, 43.49, 40.36, 32.53, 30.33, 22.73, 21.94, 21.68, 13.98, 13.72; HRMS calcd for C<sub>17</sub>H<sub>25</sub>INaO<sub>2</sub>S ([M+Na]<sup>+</sup>): 443.0512; found: 443.0512.

#### 4. Synthesis of alkynes 9.

**Table S1 Screening the conditions for esterification.**

| <div style="display: flex; justify-content: space-around; margin-top: 10px;"> <div style="text-align: center;"> <p><b>8</b></p> <p>L-menthol</p> </div> <div style="text-align: center;"> <p><b>9a</b></p> </div> <div style="text-align: center;"> <p><b>8-Me</b></p> </div> </div> |                                    |                      |                                         |
|--------------------------------------------------------------------------------------------------------------------------------------------------------------------------------------------------------------------------------------------------------------------------------------|------------------------------------|----------------------|-----------------------------------------|
| Entry                                                                                                                                                                                                                                                                                | Coupling reagent (equiv)           | Solvent              | Yield (%)                               |
| 1                                                                                                                                                                                                                                                                                    | Muk (1.05) + 2,6-lutidine (2)      | DMC                  | Complicated mixture                     |
| 2                                                                                                                                                                                                                                                                                    | EDC-HCl (1.8) + DMAP (0.25)        | DMC                  | 23% ( <b>9a</b> ) + 50% ( <b>8-Me</b> ) |
| 3                                                                                                                                                                                                                                                                                    | Muk (1.05) + 2,6-lutidine (2)      | <i>i</i> PrOAc       | Complicated mixture                     |
| <b>4</b>                                                                                                                                                                                                                                                                             | <b>EDC-HCl (1.8) + DMAP (0.25)</b> | <b><i>i</i>PrOAc</b> | <b>65% (9a)</b>                         |

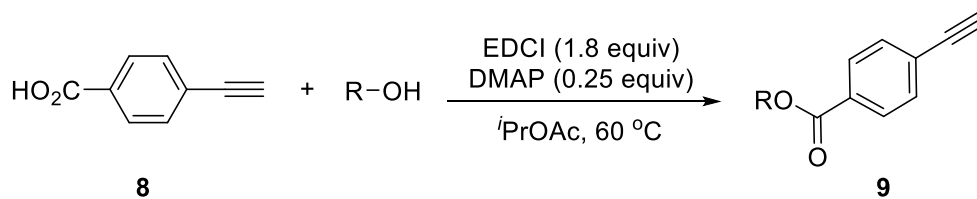

**General Procedure IV:**<sup>1</sup> To a round bottom flask were added corresponding alcohol (1.0 equiv), 4-ethynylbenzoic acid **8** (1.5 equiv), EDC-HCl (1.8 equiv), DMAP (0.25 equiv), and *i*PrOAc (0.25 M for alcohol). The mixture was stirred at 60 °C overnight until the completion of the reaction as monitored by TLC. Then the mixture was concentrated in vacuo. Alkynes **9** were obtained via chromatography on silica gel (0-30% ethyl acetate in petroleum ether).

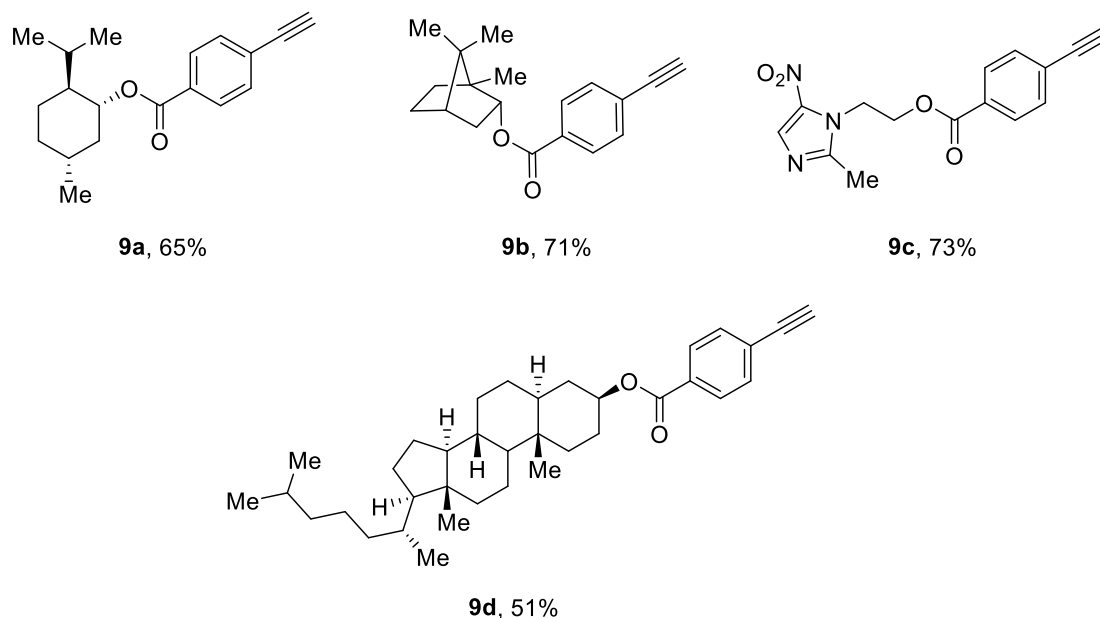

(1) **(1R,2S,5R)-2-Isopropyl-5-methylcyclohexyl 4-((E)-1-iodo-2-tosylvinyl)benzoate (9a) (pcx-11-35, pcx-11-47).**

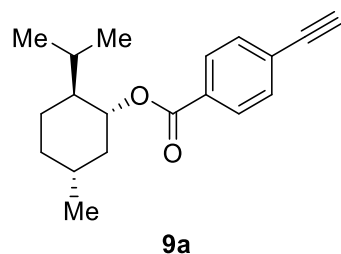

Following General Procedure IV, **9a** was afforded as a colorless oil (3.0 mmol scale, 552.6 mg, 65%): <sup>1</sup>H NMR (500 MHz, CDCl<sub>3</sub>) δ 7.99 (d, *J* = 8.2 Hz, 2 H), 7.54

(d,  $J = 8.2$  Hz, 2 H), 4.99-4.88 (m, 1 H), 3.22 (s, 1 H), 2.12 (d,  $J = 12.0$  Hz, 1 H), 1.97-1.89 (m, 1 H), 1.72 (d,  $J = 12.3$  Hz, 2 H), 1.60-1.50 (m, 2 H), 1.18-1.04 (m, 2 H), 0.96-0.88 (m, 7 H), 0.79 (d,  $J = 7.2$  Hz, 3 H);  $^{13}\text{C}$  NMR (126 MHz,  $\text{CDCl}_3$ )  $\delta$  165.46, 132.08, 130.93, 129.49, 126.58, 82.97, 79.95, 75.23, 47.32, 41.01, 34.37, 31.52, 26.60, 23.72, 22.10, 20.82, 16.60; HRMS calcd for  $\text{C}_{19}\text{H}_{24}\text{NaO}_2$  ( $[\text{M}+\text{Na}]^+$ ): 307.1669; found: 307.1665.

**(2) (1*S*,2*R*,4*S*)-1,7,7-Trimethylbicyclo[2.2.1]heptan-2-yl 4-ethynylbenzoate (9b) (pcx-11-36).**

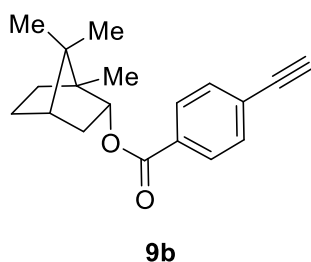

Following General Procedure IV, **9b** was afforded as a white solid (3.0 mmol scale, 600.1 mg, 71%): m.p. 103.8-105.6 °C;  $^1\text{H}$  NMR (500 MHz,  $\text{CDCl}_3$ )  $\delta$  8.00 (d,  $J = 8.4$  Hz, 2 H), 7.55 (d,  $J = 8.3$  Hz, 2 H), 5.14-5.08 (m, 1 H), 3.23 (s, 1 H), 2.52-2.43 (m, 1 H), 2.14-2.07 (m, 1 H), 1.84-1.76 (m, 1 H), 1.73 (t,  $J = 4.5$  Hz, 1 H), 1.44-1.37 (m, 1 H), 1.33-1.27 (m, 1 H), 1.13-1.09 (m, 1 H), 0.96 (s, 3 H), 0.90 (s, 6 H);  $^{13}\text{C}$  NMR (126 MHz,  $\text{CDCl}_3$ )  $\delta$  166.12, 132.08, 130.90, 129.41, 126.60, 82.92, 80.87, 80.02, 49.15, 47.94, 45.01, 36.92, 28.13, 27.44, 19.76, 18.95, 13.67; HRMS calcd for  $\text{C}_{19}\text{H}_{22}\text{NaO}_2$  ( $[\text{M}+\text{Na}]^+$ ): 305.1512; found: 305.1528.

**(3) 2-(2-Methyl-5-nitro-1*H*-imidazol-1-yl)ethyl 4-ethynylbenzoate (9c) (pcx-11-22).**

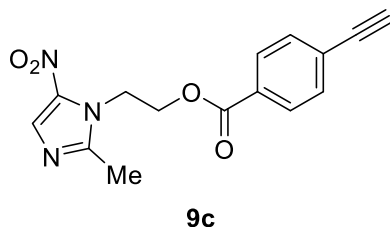

Following General Procedure IV, **9c** was afforded as a white solid (1.0 mmol scale, 221.2 mg, 73%): m.p. 126.6-128.3 °C;  $^1\text{H}$  NMR (500 MHz,  $\text{CDCl}_3$ )  $\delta$  7.98 (s, 1 H), 7.87 (d,  $J = 8.4$  Hz, 2 H), 7.54 (d,  $J = 8.5$  Hz, 2 H), 4.74-4.64 (m, 4 H), 3.26 (s, 1 H),

2.47 (s, 3 H);  $^{13}\text{C}$  NMR (126 MHz,  $\text{CDCl}_3$ )  $\delta$  165.43, 150.78, 138.62, 133.34, 132.39, 129.48, 128.97, 127.61, 82.55, 80.78, 63.08, 45.28, 14.41; HRMS calcd for  $\text{C}_{15}\text{H}_{13}\text{N}_3\text{NaO}_4$  ( $[\text{M}+\text{Na}]^+$ ): 322.0798; found: 322.0798.

(4) **(3*S*,5*S*,8*R*,10*S*,13*R*,14*S*,17*R*)-10,13-Dimethyl-17-((*R*)-6-methylheptan-2-yl)hexadecahydro-1*H*-cyclopenta[*a*]phenanthren-3-yl 4-ethynylbenzoate (9d) (pcx-11-31).**

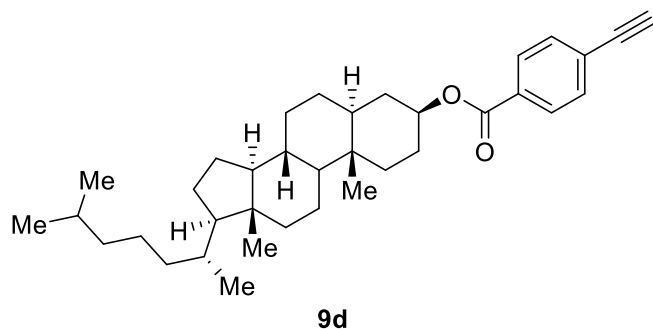

Following General Procedure IV, **9d** was afforded as a white solid (1.0 mmol scale, 263.7 mg, 51%): m.p. 147.4-149.3 °C;  $^1\text{H}$  NMR (500 MHz,  $\text{CDCl}_3$ )  $\delta$  7.98 (d,  $J$  = 8.1 Hz, 2 H), 7.53 (d,  $J$  = 8.1 Hz, 2 H), 4.94 (tt,  $J$  = 10.9, 4.9 Hz, 1 H), 3.21 (s, 1 H), 2.00-1.90 (m, 2 H), 1.83-1.75 (m, 2 H), 1.73-1.61 (m, 3 H), 1.53-1.47 (m, 3 H), 1.38-1.22 (m, 10 H), 1.17-1.07 (m, 7 H), 1.04-0.97 (m, 3 H), 0.90 (d,  $J$  = 6.5 Hz, 4 H), 0.88-0.84 (m, 9 H), 0.66 (s, 3 H);  $^{13}\text{C}$  NMR (126 MHz,  $\text{CDCl}_3$ )  $\delta$  165.50, 132.04, 131.05, 129.48, 126.52, 83.01, 79.90, 74.80, 56.51, 56.37, 54.33, 44.80, 42.69, 40.08, 39.61, 36.88, 36.27, 35.90, 35.61, 35.59, 34.19, 32.09, 28.73, 28.34, 28.10, 27.66, 24.31, 23.94, 22.91, 22.66, 21.32, 18.77, 12.38, 12.17; HRMS calcd for  $\text{C}_{36}\text{H}_{52}\text{NaO}_2$  ( $[\text{M}+\text{Na}]^+$ ): 539.3860; found: 539.3861.

## 5. Iodosulfonylation of alkynes **9**.

(1) **(1*R*,2*S*,5*R*)-2-Isopropyl-5-methylcyclohexyl 4-ethynylbenzoate (10a) (pcx-10-8).**

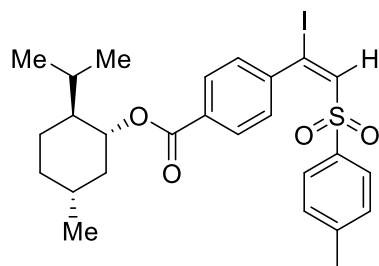

**10a**

Following General Procedure III, after being stirred for 2 h, **10a** was afforded as a white solid (0.2 mmol scale, 124.8 mg, 99%) by filtration and recrystallization (ethyl acetate/petroleum ether = 1:20): m.p. 121.0-122.9 °C; <sup>1</sup>H NMR (500 MHz, CDCl<sub>3</sub>) δ 7.97 (d, *J* = 8.2 Hz, 2 H), 7.50 (d, *J* = 8.2 Hz, 2 H), 7.36 (s, 1 H), 7.29 (d, *J* = 8.2 Hz, 2 H), 7.22 (d, *J* = 8.0 Hz, 2 H), 4.95 (td, *J* = 10.9, 4.4 Hz, 1 H), 2.41 (s, 3 H), 2.12 (d, *J* = 12.2 Hz, 1 H), 2.00-1.93 (m, 1 H), 1.77-1.71 (m, 2 H), 1.59-1.53 (m, 2 H), 1.19-1.14 (m, 1 H), 1.13-1.06 (m, 1 H), 0.99-0.89 (m, 7 H), 0.81 (d, *J* = 7.0 Hz, 3 H); <sup>13</sup>C NMR (126 MHz, CDCl<sub>3</sub>) δ 165.20, 145.01, 143.88, 141.80, 137.16, 131.80, 129.92, 129.23, 128.00, 127.56, 112.01, 75.32, 47.35, 41.02, 34.36, 31.55, 26.56, 23.64, 22.13, 21.73, 20.89, 16.55; HRMS calcd for C<sub>26</sub>H<sub>31</sub>INaO<sub>4</sub>S ([M+Na]<sup>+</sup>): 589.0880; found: 589.0879.

**(2) (1*S*,2*R*,4*S*)-1,7,7-Trimethylbicyclo[2.2.1]heptan-2-yl 4-((*E*)-1-iodo-2-tosylvinyl)benzoate (10b) (pcx-10-31).**

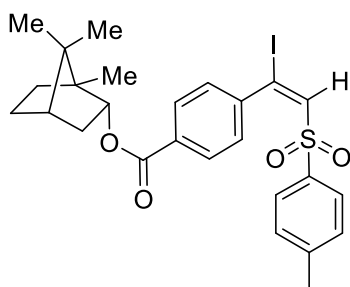

**10b**

Following General Procedure III, after being stirred for 2 h, **10b** was afforded as a white solid (0.2 mmol scale, 62.2 mg, 55%) by filtration and recrystallization (ethyl acetate/petroleum ether = 1:20): m.p. 158.3-159.4 °C; <sup>1</sup>H NMR (500 MHz, CDCl<sub>3</sub>) δ 7.99 (d, *J* = 8.1 Hz, 2 H), 7.51 (d, *J* = 8.1 Hz, 2 H), 7.36 (s, 1 H), 7.31 (d, *J* = 8.1 Hz, 2 H), 7.23 (d, *J* = 8.0 Hz, 2 H), 5.12 (d, *J* = 9.7 Hz, 1 H), 2.53-2.45 (m, 1 H), 2.41 (s, 3 H), 2.14-2.08 (m, 1 H), 1.86-1.78 (m, 1 H), 1.75 (t, *J* = 4.5 Hz, 1 H), 1.46-1.39 (m, 1

H), 1.35-1.28 (m, 1 H), 1.12 (dd,  $J = 13.8, 3.6$  Hz, 1 H), 0.97 (s, 3 H), 0.92 (s, 6 H);  $^{13}\text{C}$  NMR (126 MHz,  $\text{CDCl}_3$ )  $\delta$  165.88, 145.02, 143.95, 141.70, 137.13, 131.77, 129.94, 129.16, 127.95, 127.54, 111.95, 81.01, 49.17, 47.98, 45.02, 36.96, 28.15, 27.45, 21.72, 19.78, 18.98, 13.69; HRMS calcd for  $\text{C}_{26}\text{H}_{29}\text{INaO}_4\text{S}$  ( $[\text{M}+\text{Na}]^+$ ): 587.0723; found: 587.0723.

**(3) 2-(2-Methyl-5-nitro-1H-imidazol-1-yl)ethyl (E)-4-(1-iodo-2-tosylvinyl) benzoate (10c) (pcx-11-24).**

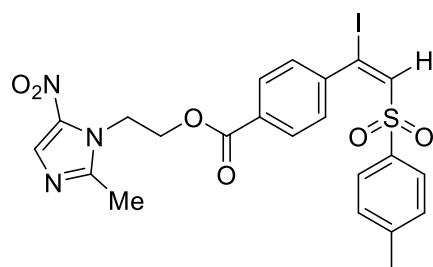

**10c**

Following General Procedure III, after being stirred for 2 h, **10c** was afforded as a white solid (0.2 mmol scale, 82.4 mg, 71%) by filtration and recrystallization (ethyl acetate/petroleum ether = 1:20): m.p. 205.9-207.8 °C;  $^1\text{H}$  NMR (500 MHz,  $\text{DMSO}-d_6$ )  $\delta$  8.08 (s, 1 H), 7.83 (s, 1 H), 7.79 (d,  $J = 8.2$  Hz, 2 H), 7.53 (d,  $J = 8.2$  Hz, 2 H), 7.38 (d,  $J = 8.0$  Hz, 2 H), 7.27 (d,  $J = 8.2$  Hz, 2 H), 4.76 (t,  $J = 5.1$  Hz, 2 H), 4.67 (t,  $J = 5.1$  Hz, 2 H), 2.39 (s, 3 H);  $^{13}\text{C}$  NMR (126 MHz,  $\text{DMSO}-d_6$ )  $\delta$  164.78, 151.58, 145.42, 144.83, 140.48, 138.70, 137.15, 133.33, 130.10, 129.35, 128.67, 127.57, 127.40, 113.48, 63.28, 44.82, 21.22, 14.09; HRMS calcd for  $\text{C}_{43}\text{H}_{59}\text{INaO}_4\text{S}$  ( $[\text{M}+\text{Na}]^+$ ): 604.0010; found: 604.0009.

**(4) (3S,5S,8R,10S,13R,14S,17R)-10,13-Dimethyl-17-((R)-6-methylheptan-2-yl)hexadecahydro-1H-cyclopenta[a]phenanthren-3-yl 4-((E)-1-iodo-2-tosylvinyl) benzoate (10d) (pcx-11-33).**

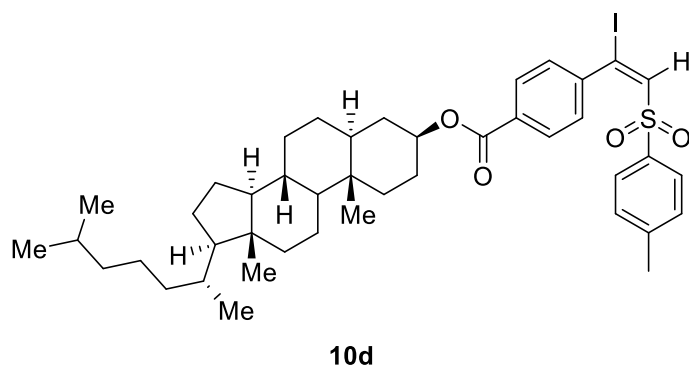

Following General Procedure III, after being stirred for 2 h, **10d** was afforded as a white solid (0.2 mmol scale, 63.9 mg, 40%) by filtration and recrystallization (ethyl acetate/petroleum ether = 1:20): m.p. 186.2-187.8 °C; <sup>1</sup>H NMR (500 MHz, CDCl<sub>3</sub>) δ 7.96 (d, *J* = 8.0 Hz, 2 H), 7.50 (d, *J* = 7.9 Hz, 2 H), 7.35 (s, 1 H), 7.28 (d, *J* = 8.0 Hz, 2 H), 7.23 (d, *J* = 7.9 Hz, 2 H), 4.96 (tt, *J* = 10.9, 5.0 Hz, 1 H), 2.41 (s, 3 H), 2.00-1.92 (m, 2 H), 1.85-1.77 (m, 2 H), 1.72-1.62 (m, 3 H), 1.54-1.47 (m, 3 H), 1.38-1.21 (m, 10 H), 1.17-1.06 (m, 7 H), 1.04-0.98 (m, 3 H), 0.91 (d, *J* = 6.5 Hz, 4 H), 0.88 (s, 6 H), 0.86 (s, 3 H), 0.66 (s, 3 H); <sup>13</sup>C NMR (126 MHz, CDCl<sub>3</sub>) δ 165.25, 145.03, 143.85, 141.77, 137.22, 131.94, 129.96, 129.22, 128.00, 127.51, 112.11, 74.86, 56.52, 56.37, 54.34, 44.81, 42.70, 40.08, 39.61, 36.88, 36.26, 35.89, 35.61, 35.59, 34.19, 32.10, 28.74, 28.34, 28.10, 27.67, 24.31, 23.93, 22.91, 22.65, 21.75, 21.32, 18.76, 12.39, 12.17; HRMS calcd for C<sub>43</sub>H<sub>59</sub>INaO<sub>4</sub>S ([M+Na]<sup>+</sup>): 821.3071; found: 821.3074.

## 6. Synthesis of cyclopropenes 11.

**Table S2 Screening the conditions for cyclopropenation of phenylacetylene.**

| $\text{Ph}-\text{C}\equiv\text{C} + \text{MeO}_2\text{C}-\text{C}(\text{N}_2)=\text{CO}_2\text{Me} \xrightarrow[\text{solvent, T } ^\circ\text{C}]{\text{Rh}_2(\text{OAc})_4 (0.25 \text{ mol}\%)} \text{MeO}_2\text{C}-\text{C}(\text{CO}_2\text{Me})=\text{C}(\text{Ph})$ |                    |                  |           |
|-----------------------------------------------------------------------------------------------------------------------------------------------------------------------------------------------------------------------------------------------------------------------------|--------------------|------------------|-----------|
| Entry                                                                                                                                                                                                                                                                       | Solvent            | Temperature (°C) | Yield (%) |
| 1                                                                                                                                                                                                                                                                           | dichloromethane    | 40               | 45        |
| 2                                                                                                                                                                                                                                                                           | <i>i</i> PrOAc     | 60               | 0         |
| 3                                                                                                                                                                                                                                                                           | dimethyl carbonate | 60               | 0         |
| 4                                                                                                                                                                                                                                                                           | <b>anisole</b>     | <b>60</b>        | <b>31</b> |
| 5                                                                                                                                                                                                                                                                           | <b>heptane</b>     | <b>100</b>       | <b>32</b> |

**Table S3 Screening the conditions for cyclopropanation of 9b.**

| Entry | Solvent | Temperature (°C) | Yield (%) |
|-------|---------|------------------|-----------|
| 1     | anisole | 100              | 0         |
| 2     | heptane | 100              | 29        |

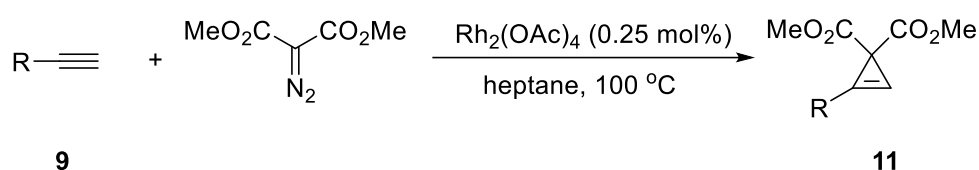

**General Procedure V:** Under nitrogen atmosphere, to a three-neck flask equipped with a stirring bar were added anhydrous  $\text{Rh}_2(\text{OAc})_4$  (0.25 mol%), and a solution of alkyne **9** (1 equiv) in heptane (0.025 M). The mixture was then heated at 100 °C. After that, a solution of dimethyl 2-diazomalonate (3 equiv) in heptane (0.05 M) was added via a syringe pump over a period of 2 h. After complete conversion of the starting material as monitored by TLC, the mixture was concentrated in vacuo. Cyclopropene **11** was obtained via chromatography on silica gel (0-20% ethyl acetate in petroleum ether).

(1) **Dimethyl 2-(4-((((1*R*,2*S*,5*R*)-2-isopropyl-5-methylcyclohexyl)oxy)carbonyl)phenyl)cycloprop-2-ene-1,1-dicarboxylate (11a)** (pcx-7-4, pcx-7-7-2)

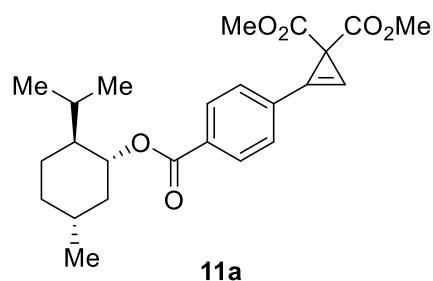

Following General Procedure V, **11a** was afforded as a colorless oil (0.4 mmol scale, 16.6 mg, 10%):  $^1\text{H}$  NMR (500 MHz,  $\text{CDCl}_3$ )  $\delta$  8.11 (d,  $J = 8.3$  Hz, 2 H), 7.69 (d,

$J = 8.3$  Hz, 2 H), 7.04 (s, 1 H), 4.94 (td,  $J = 10.9, 4.5$  Hz, 1 H), 3.74 (d,  $J = 2.3$  Hz, 6 H), 2.14-2.09 (m, 1 H), 1.95-1.90 (m, 1 H), 1.76-1.71 (m, 2 H), 1.59-1.52 (m, 2 H), 1.15-1.07 (m, 2 H), 0.96-0.89 (m, 7 H), 0.79 (d,  $J = 6.9$  Hz, 3 H);  $^{13}\text{C}$  NMR (126 MHz,  $\text{CDCl}_3$ )  $\delta$  170.73, 170.72, 165.17, 132.39, 130.11, 129.98, 127.84, 111.71, 97.98, 75.28, 52.41, 52.39, 47.18, 40.84, 34.20, 32.88, 31.37, 26.53, 23.62, 21.95, 20.64, 16.49; HRMS calcd for  $\text{C}_{24}\text{H}_{30}\text{NaO}_6$  ( $[\text{M}+\text{Na}]^+$ ): 437.1935; found: 437.1936.

(2) **Dimethyl 2-(4-((((1*S*,2*R*,4*S*)-1,7,7-trimethylbicyclo[2.2.1]heptan-2-yl)oxy)carbonyl)phenyl)cycloprop-2-ene-1,1-dicarboxylate (11b) (pcx-7-18, pcx-7-23, pcx-11-42).**

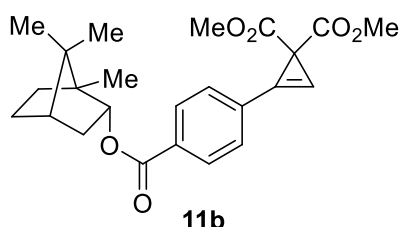

Following General Procedure V, **11b** was afforded as a pale yellow oil (0.2 mmol scale, 11.9 mg, 29%):  $^1\text{H}$  NMR (500 MHz,  $\text{CDCl}_3$ )  $\delta$  8.12 (d,  $J = 8.4$  Hz, 2 H), 7.69 (d,  $J = 8.4$  Hz, 2 H), 7.04 (s, 1 H), 5.15-5.10 (m, 1 H), 3.73 (s, 6 H), 2.51-2.44 (m, 1 H), 2.13-2.06 (m, 1 H), 1.84-1.77 (m, 1 H), 1.74 (t,  $J = 4.5$  Hz, 1 H), 1.45-1.38 (m, 1 H), 1.31-1.29 (m, 1 H), 1.11 (dd,  $J = 13.8, 3.5$  Hz, 1 H), 0.96 (s, 3 H), 0.91 (s, 3 H), 0.90 (s, 3 H);  $^{13}\text{C}$  NMR (126 MHz,  $\text{CDCl}_3$ )  $\delta$  170.84, 166.03, 132.58, 130.28, 130.05, 128.00, 111.93, 98.08, 81.09, 52.56, 49.21, 47.99, 45.05, 36.96, 33.04, 28.15, 27.46, 19.77, 18.97, 13.66; HRMS calcd for  $\text{C}_{24}\text{H}_{28}\text{NaO}_6$  ( $[\text{M}+\text{Na}]^+$ ): 435.1778; found: 435.1783.

## 7. Iodosulfonation of cyclopropenes 11.

(1) **Dimethyl (2*R*\*,3*S*\*)-2-iodo-2-(4-((((1*R*,2*S*,5*R*)-2-isopropyl-5-methylcyclohexyl)oxy)carbonyl)phenyl)-3-tosylcyclopropane-1,1-dicarboxylate (12a) (pcx-7-10).**

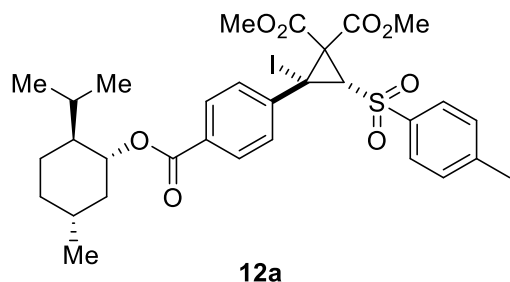

Following General Procedure I, after being stirred for 3 h, **12a** was afforded as a white solid (0.1 mmol scale, 47.5 mg, 74%, 1:1 dr based on original chiral centres of the substrate) by filtration and trituration (ethyl acetate/petroleum ether = 1:20): m.p. 181.1-182.3 °C;  $^1\text{H}$  NMR (500 MHz,  $\text{CDCl}_3$ )  $\delta$  8.05 (dd,  $J = 8.4, 2.4$  Hz, 2 H), 7.90 (dd,  $J = 8.8, 1.9$  Hz, 2 H), 7.44 (dd,  $J = 8.1, 2.1$  Hz, 2 H), 7.13-7.10 (d,  $J = 7.1$  Hz, 2 H), 4.89 (tt,  $J = 10.8, 4.0$  Hz, 1 H), 3.98 (s, 3 H), 3.70 (s, 1 H), 3.57 (d,  $J = 3.2$  Hz, 3 H), 2.50 (s, 3 H), 2.08-2.03 (m, 1 H), 1.92-1.87 (m, 1 H), 1.71 (d,  $J = 12.3$  Hz, 2 H), 1.50 (d,  $J = 10.9$  Hz, 2 H), 1.11 (d,  $J = 11.6$  Hz, 1 H), 1.04 (dd,  $J = 11.3, 3.3$  Hz, 1 H), 0.92-0.88 (m, 7 H), 0.76 (dd,  $J = 7.0, 1.8$  Hz, 3 H);  $^{13}\text{C}$  NMR (126 MHz,  $\text{CDCl}_3$ )  $\delta$  165.11, 163.25, 162.06, 147.35, 147.32, 145.81, 136.79, 130.99, 130.96, 130.19, 130.17, 129.96, 128.77, 126.91, 75.27, 54.14, 53.64, 51.31, 51.28, 47.32, 47.29, 44.80, 44.75, 40.99, 34.33, 31.50, 26.48, 26.47, 23.58, 22.08, 21.88, 20.86, 20.84, 16.48, 16.46, 6.51, 6.44; HRMS calcd for  $\text{C}_{31}\text{H}_{37}\text{INaO}_8\text{S}$  ( $[\text{M}+\text{Na}]^+$ ): 719.1146; found: 719.1155.

(2) **Dimethyl (2*R*\*,3*S*\*)-2-iodo-3-tosyl-2-(4-(((1*S*,2*R*,4*S*)-1,7,7-trimethylbicyclo[2.2.1]heptan-2-yl)oxy)carbonyl)phenyl)cyclopropane-1,1-dicarboxylate (12b) (pcx-7-25).**

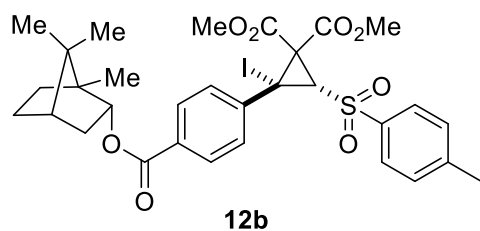

Following General Procedure I, after being stirred for 2 h, **12b** was afforded as a white solid (0.25 mmol scale, 129.9 mg, 75%, 1:1 dr based on original chiral centres of the substrate) by filtration and trituration (ethyl acetate/petroleum ether = 1:20): m.p. 188.2 °C (decomposition);  $^1\text{H}$  NMR (500 MHz,  $\text{CDCl}_3$ )  $\delta$  8.05 (d,  $J = 8.1$  Hz, 2 H), 7.92 (d,  $J = 8.4$  Hz, 2 H), 7.45 (d,  $J = 8.0$  Hz, 2 H), 7.14 (d,  $J = 8.1$  Hz, 2 H), 5.08-5.03

(m, 1 H), 3.98 (s, 3 H), 3.71 (s, 1 H), 3.57 (d,  $J = 4.0$  Hz, 3 H), 2.51 (s, 3 H), 2.48-2.40 (m, 1 H), 2.08-2.01 (m, 1 H), 1.83-1.75 (m, 1 H), 1.72 (t,  $J = 4.5$  Hz, 1 H), 1.42-1.35 (m, 1 H), 1.31-1.23 (m, 1 H), 1.10-1.03 (m, 1 H), 0.94 (s, 3 H), 0.90 (s, 3 H), 0.88 (d,  $J = 4.1$  Hz, 3 H);  $^{13}\text{C}$  NMR (126 MHz,  $\text{CDCl}_3$ )  $\delta$  165.78, 163.27, 162.03, 147.43, 145.80, 136.81, 131.00, 130.19, 130.15, 128.77, 126.96, 81.01, 80.98, 54.15, 53.62, 51.31, 51.29, 49.17, 49.13, 47.98, 45.03, 44.75, 36.96, 36.90, 28.14, 27.45, 21.89, 19.78, 18.96, 13.67, 13.65, 6.46, 6.44; HRMS calcd for  $\text{C}_{31}\text{H}_{35}\text{INaO}_8\text{S}$  ( $[\text{M}+\text{Na}]^+$ ): 717.0990; found: 717.0997.

## 8. Synthesis of a MAT2A inhibitor 15.

### (1) Gram-scale synthesis of **13** (pcx-11-5).

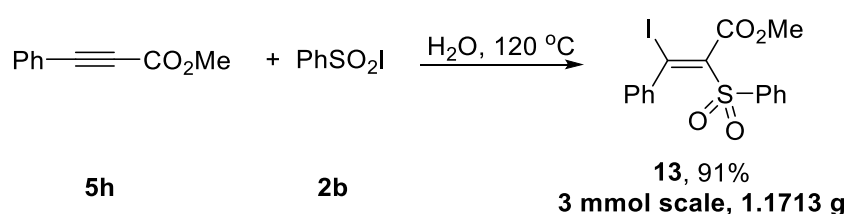

To a 50 mL reaction tube equipped with a stirring bar was added **5a** (0.44 mL, 3.0 mmol, 1.0 equiv), **2b** (964.9 mg, 3.6 mmol, 1.2 equiv), and  $\text{H}_2\text{O}$  (30 mL) successively, and the tube was sealed with a septum. The mixture was heated at 120  $^\circ\text{C}$  for 2 hours. After the reaction was complete, the aqueous layer was extracted with EtOAc (10 mL  $\times$  3), washed with brine (15 mL), dried over anhydrous  $\text{MgSO}_4$ , filtered and concentrated in vacuo. After that, the mixture triturated with a mixture of ethyl acetate and petroleum ether (1:15) to afford **13** (1.1713g, 91%) as a white solid:  $^1\text{H}$  NMR (500 MHz,  $\text{CDCl}_3$ )  $\delta$  7.50 (t,  $J = 7.4$  Hz, 1 H), 7.41 (d,  $J = 7.2$  Hz, 2 H), 7.29 (t,  $J = 7.8$  Hz, 2 H), 7.24 (d,  $J = 7.0$  Hz, 1 H), 7.18 (t,  $J = 7.6$  Hz, 2 H), 7.00 (d,  $J = 7.3$  Hz, 2 H), 3.95 (s, 3 H);  $^{13}\text{C}$  NMR (126 MHz,  $\text{CDCl}_3$ )  $\delta$  163.94, 146.35, 139.89, 139.27, 133.73, 129.65, 128.71, 127.99, 127.84, 127.18, 114.90, 53.76; HRMS calcd for  $\text{C}_{21}\text{H}_{14}\text{ClINNaO}_3\text{S}$  ( $[\text{M}+\text{Na}]^+$ ): 450.9471; found: 450.9472.

### (2) 6-Chloro-4-phenyl-3-(phenylsulfonyl)quinolin-2(1H)-one (**15**) (pcx-11-34-4).

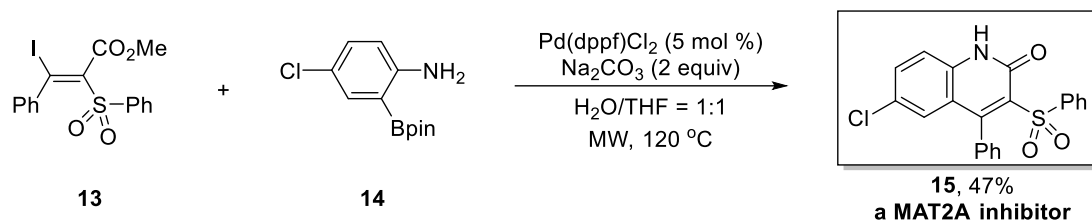

To a 10 mL microwave reaction tube equipped with a stirring bar was added **13** (85.9 mg, 0.2 mmol, 1.0 equiv), **14** (107.4 mg, 0.3 mmol, 1.5 equiv), Pd(dppf)Cl<sub>2</sub> (7.6 mg, 0.01mmol, 5 mol%), Na<sub>2</sub>CO<sub>3</sub> (43.5 mg, 0.4mmol, 2.0 equiv), and THF/H<sub>2</sub>O (1:1, 2 mL) successively and the tube was sealed with a septum and heated at 120 °C for 1h under 120 W of microwave irradiation. The mixture was cooled to room temperature. The mixture was extracted with EtOAc (5 mL × 3), washed with brine (5 mL), dried over anhydrous MgSO<sub>4</sub>, filtered and concentrated in vacuo. The residual was purification by chromatography on silica gel (0-50% ethyl acetate in petroleum ether) to afford the product **15** as an oil (0.2 mmol scale, 37.4 mg, 47%): <sup>1</sup>H NMR (500 MHz, CDCl<sub>3</sub>) δ 12.82 (s, 1 H), 8.03 (d, *J* = 7.6 Hz, 2 H), 7.62-7.59 (m, 1 H), 7.58 (s, 2 H), 7.56 (d, *J* = 7.1 Hz, 2 H), 7.48 (t, *J* = 7.5 Hz, 2 H), 7.38-7.33 (m, 2 H), 7.23 (d, *J* = 8.5 Hz, 1 H), 7.06 (s, 1 H); <sup>13</sup>C NMR (126 MHz, CDCl<sub>3</sub>) δ 156.34, 141.47, 137.82, 133.79, 133.40, 133.29, 129.15, 129.05, 128.83, 128.53, 128.38, 128.34, 127.86, 121.68, 117.73; HRMS calcd for C<sub>21</sub>H<sub>14</sub>ClNNaO<sub>3</sub>S ([M+Na]<sup>+</sup>): 418.0275; found: 418.0273.

## 9. Formal synthesis of a dipeptide renin inhibitor **20**.

### (1) Gram-scale synthesis of **3a** (pcx-5-49).

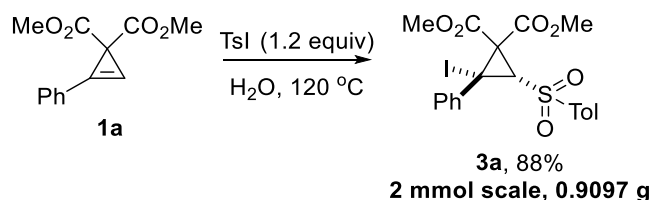

To a 50 mL reaction tube equipped with a stirring bar was added **1a** (464.4 mg, 2.0 mmol, 1.0 equiv), **2a** (680.7 mg, 2.4 mmol, 1.2 equiv), and H<sub>2</sub>O (20.0 mL) successively, and the tube was sealed with a septum. The mixture was heated at 120 °C for 2 hours. After that, the mixture was filtered and triturated with a mixture of ethyl acetate and petroleum ether (1:15) to afford **3a** (909.7 mg, 88%) as a solid.

**(2) Dimethyl 2-phenyl-3-tosylcyclopropane-1,1-dicarboxylate (**16**) (pcx-7-33).**

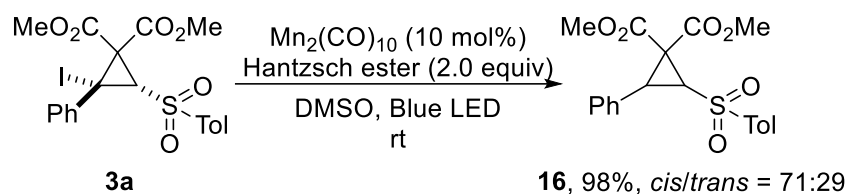

To a flame-dried Schlenk tube was added  $\text{Mn}_2(\text{CO})_{10}$  (7.8 mg, 0.02 mmol) and Hantzsch ester (113.1 mg, 0.4 mmol). Compound **3a** (102.9 mg, 0.2 mmol) and anhydrous DMSO (2 mL) were sequentially added under nitrogen. After that, the Schlenk tube was irradiated using a Blue LED light. A fan was used to maintain room temperature. After being stirred overnight, the reaction was complete as monitored by TLC. 3 M HCl (3 mL) was added to quench the reaction. The aqueous layer was extracted with EtOAc (5 mL  $\times$  3) and the combined organic layer was washed with brine (5 mL), dried over anhydrous  $\text{MgSO}_4$ , filtered and concentrated in vacuo. **16** was obtained via chromatography (0-25% ethyl acetate in petroleum ether) as a white solid (76.4 mg, 98%, *cis/trans* = 71:29): m.p. 134.4-136.0 °C.

The following signals are discernible for the *cis*-isomer:  $^1\text{H}$  NMR (500 MHz,  $\text{CDCl}_3$ )  $\delta$  7.67-7.63 (m, 2 H), 7.62 (d,  $J$  = 8.3 Hz, 2 H), 7.40 (d,  $J$  = 8.1 Hz, 1 H), 7.32 (d,  $J$  = 1.9 Hz, 2 H), 7.29 (d,  $J$  = 8.2 Hz, 2 H), 3.81 (s, 3 H), 3.78 (s, 3 H), 3.61 (d,  $J$  = 10.2 Hz, 1 H), 3.28 (d,  $J$  = 10.1 Hz, 1 H), 2.44 (s, 3 H);  $^{13}\text{C}$  NMR (126 MHz,  $\text{CDCl}_3$ )  $\delta$  168.83, 163.50, 144.85, 137.80, 131.01, 130.04, 129.60, 127.84, 127.74, 127.62, 53.88, 52.82, 47.85, 39.29, 36.22, 21.61.

The following signals are discernible for the *trans*-isomer:  $^1\text{H}$  NMR (500 MHz,  $\text{CDCl}_3$ )  $\delta$  7.89 (d,  $J$  = 8.4 Hz, 2 H), 7.34 (d,  $J$  = 4.6 Hz, 1 H), 7.33 (d,  $J$  = 2.2 Hz, 2 H), 7.26 (d,  $J$  = 2.3 Hz, 2 H), 7.14-7.11 (m, 2 H), 3.98 (d,  $J$  = 7.8 Hz, 1 H), 3.92 (s, 3 H), 3.92 (d,  $J$  = 7.5 Hz, 1 H), 3.48 (s, 3 H), 2.47 (s, 3 H);  $^{13}\text{C}$  NMR (126 MHz,  $\text{CDCl}_3$ )  $\delta$  164.88, 164.69, 145.27, 136.68, 131.58, 129.27, 128.51, 128.25, 128.13, 127.94, 53.56, 53.14, 48.53, 44.08, 33.78, 21.67; HRMS calcd for  $\text{C}_{20}\text{H}_{20}\text{NaO}_6\text{S}$  ( $[\text{M}+\text{Na}]^+$ ): 411.0873; found: 411.0876.

**(3) Methyl 2-phenyl-3-tosylcyclopropane-1-carboxylate (**17**) (pcx-8-48).**

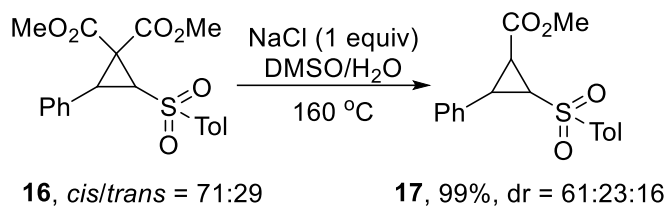

To a flame-dried Schlenk tube were added NaCl (26.0 mg, 0.41 mmol), Compound **16** (176.1 mg, 0.41 mmol) in anhydrous DMSO (2 mL), and H<sub>2</sub>O sequentially under nitrogen. After the reaction mixture was heated at 160 °C for 2 hours, H<sub>2</sub>O (3 mL) was added to quench the reaction. The aqueous layer was extracted with EtOAc (5 mL  $\times$  3) and the combined organic layer was washed with brine (5 mL), dried over anhydrous MgSO<sub>4</sub>, filtered and concentrated in vacuo. **17** (133.9 mg, 99%, *dr* = 61:23:16) was obtained via chromatography on silica gel (0-25% ethyl acetate in petroleum ether) as an oil: <sup>1</sup>H NMR (500 MHz, CDCl<sub>3</sub>)  $\delta$  7.88-7.83 (m, 1.51 H), 7.43-7.37 (m, 1.52 H), 7.32-7.24 (m, 3.61 H), 7.21-7.17 (m, 0.94 H), 7.13-7.08 (m, 1.50 H), 3.83 (s, 0.48 H), 3.79 (0.68 H), 3.59 (dd, *J* = 6.3, 4.9 Hz, 0.73 H), 3.51 (s, 1.82 H), 3.41 (dd, *J* = 10.4, 6.5 Hz, 0.61 H), 3.32 (d, *J* = 8.1 Hz, 0.44 H), 3.10 (t, *J* = 8.1 Hz, 0.25 H), 3.05-3.01 (m, 0.15 H), 2.94 (dd, *J* = 10.4, 4.9 Hz, 0.58 H), 2.59 (dd, *J* = 9.3, 7.2 Hz, 0.20 H), 2.49 (s, 1.68 H), 2.48 (s, 0.63 H), 2.43 (s, 0.64 H); <sup>13</sup>C NMR (126 MHz, CDCl<sub>3</sub>)  $\delta$  170.87, 167.53, 167.10, 145.12, 144.92, 144.58, 137.43, 137.09, 136.75, 135.71, 132.43, 130.41, 130.25, 130.01, 129.93, 129.57, 129.53, 128.87, 128.71, 128.49, 128.12, 127.93, 127.88, 127.83, 127.78, 127.72, 127.44, 126.88, 52.88, 52.81, 52.34, 47.57, 46.56, 44.68, 44.21, 32.26, 31.51, 30.69, 30.27, 29.76, 28.27, 27.43, 23.74, 21.76, 21.68; HRMS calcd for C<sub>18</sub>H<sub>18</sub>NaO<sub>4</sub>S ([M+Na]<sup>+</sup>): 353.0818; found: 353.0823.

**(4) 2-Phenyl-3-tosylcyclopropane-1-carboxylic acid (18) (pcx-8-49).**

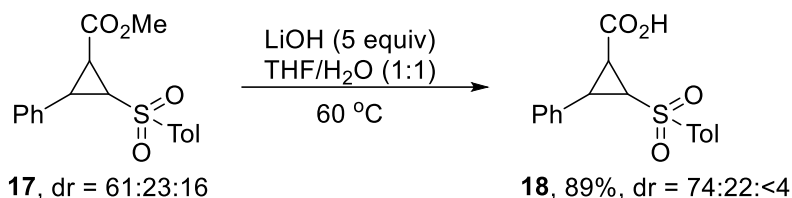

To a round bottom flask was added LiOH (42.0 mg, 1.7 mmol) and compound **17** (112.0 mg, 0.34 mmol) in THF/H<sub>2</sub>O (1:1, 4.0 mL). The mixture was stirred at 60 °C stirred overnight until the reaction was complete as monitored by TLC. 3 M HCl (2 mL)

was added to quench the reaction. The aqueous layer was extracted with EtOAc (5 mL  $\times$  3) and the combined organic layer was washed with brine (5 mL), dried over anhydrous  $\text{MgSO}_4$ , filtered and concentrated in vacuo. **18** (95.7 mg, 89%, dr = 74:22:<4) was obtained via chromatography on silica gel (eluent: petroleum ether/diethyl ether = 3/1) as an oil:  $^1\text{H}$  NMR (500 MHz,  $\text{CDCl}_3$ )  $\delta$  7.84 (d,  $J$  = 8.2 Hz, 1.48 H), 7.80 (d,  $J$  = 8.2 Hz, 0.08 H), 7.54 (d,  $J$  = 8.5 Hz, 0.10 H), 7.40 (d,  $J$  = 8.1 Hz, 1.50 Hz), 7.33-7.27 (m, 1.57 H), 7.26-7.22 (m, 2.12 H), 7.21-7.15 (m, 1.04 H), 7.10-7.05 (m, 1.45 H), 3.54 (dd,  $J$  = 6.3, 5.1 Hz, 0.74 H), 3.44 (dd,  $J$  = 10.3, 6.7 Hz), 3.29 (dd,  $J$  = 9.3, 4.8 Hz, 0.22 H), 3.23 (t,  $J$  = 5.8 Hz, 0.22 H), 3.09 (dd,  $J$  = 9.0, 7.2 Hz, 0.24 H), 2.87 (dd,  $J$  = 10.4, 4.8 Hz, 0.72 H), 2.49 (s, 2.15 H), 2.45 (s, 0.12 H), 2.43 (s, 0.67 H);  $^{13}\text{C}$  NMR (126 MHz,  $\text{CDCl}_3$ )  $\delta$  175.53, 172.34, 145.27, 144.75, 136.86, 136.46, 131.86, 130.29, 130.12, 129.98, 129.64, 129.44, 128.90, 128.70, 128.52, 128.16, 127.97, 127.93, 127.89, 127.81, 127.71, 126.83, 46.70, 44.48, 32.63, 31.49, 31.27, 30.25, 29.75, 29.41, 27.11, 23.74, 22.74, 21.75, 21.67, 14.17; HRMS calcd for  $\text{C}_{17}\text{H}_{15}\text{O}_4\text{S}$  ( $[\text{M}-\text{H}]^-$ ): 315.0697; found: 315.0699.

According to literature,<sup>2</sup> condensation of acid **18** with amine **19** will give the final renin inhibitor **20**.

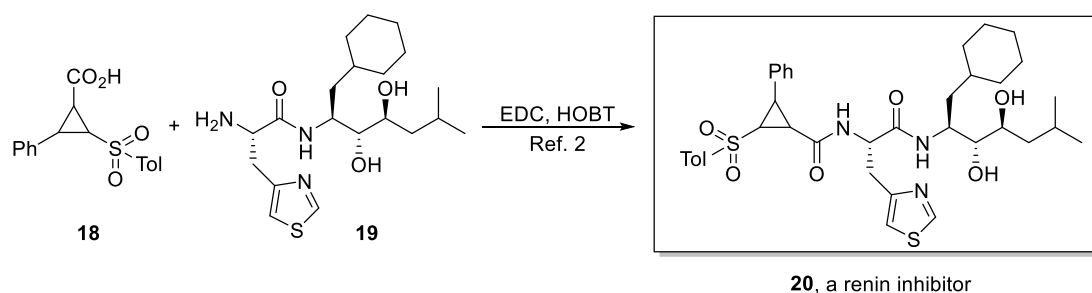

#### 10. Control experiment (pcx-8-31).

To a 10 mL reaction tube equipped with a stirring bar was added **1** (24.8 mg, 0.1 mmol, 1.0 equiv), **2** (36.0 mg, 0.12 mmol, 1.2 equiv), TEMPO (46.9 mg, 0.3 mmol, 3.0 equiv), and  $\text{H}_2\text{O}$  (1.0 mL) successively and the tube was sealed with a septum. The mixture was stirred at 120  $^\circ\text{C}$  for 2 h. **3a** was not observed in this reaction.

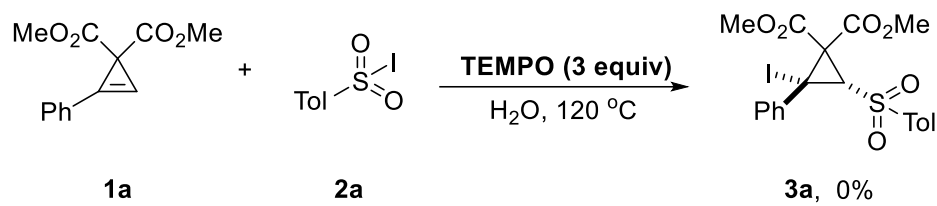

## References

- 1 A. Jordan, K. D. Whymark, J. Sydenham, H. F. Sneddon, *Green Chem.*, 2021, **23**, 6405.
- 2 W. R. Baker, H.-S. Jae, S. R. Martin, S. L. Condon, H. H. Stein, J. Cohen, H. D. Kleinert, *Bioorg. Med. Chem. Lett.*, 1992, **2**, 1405.

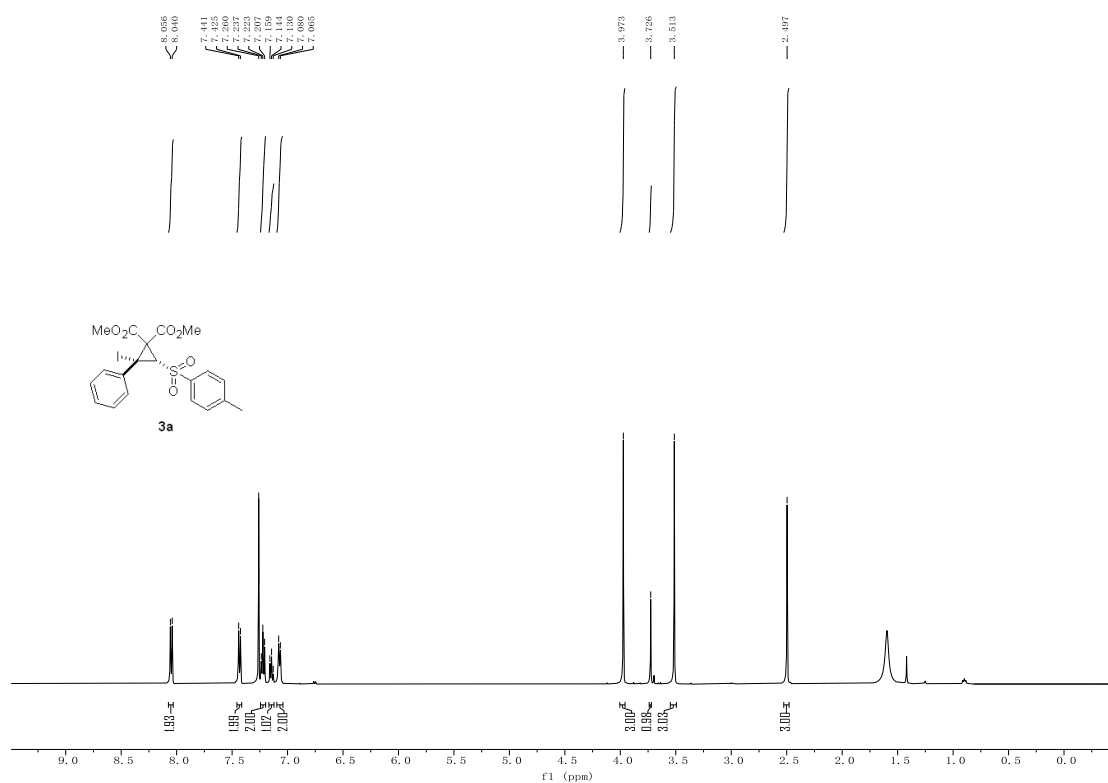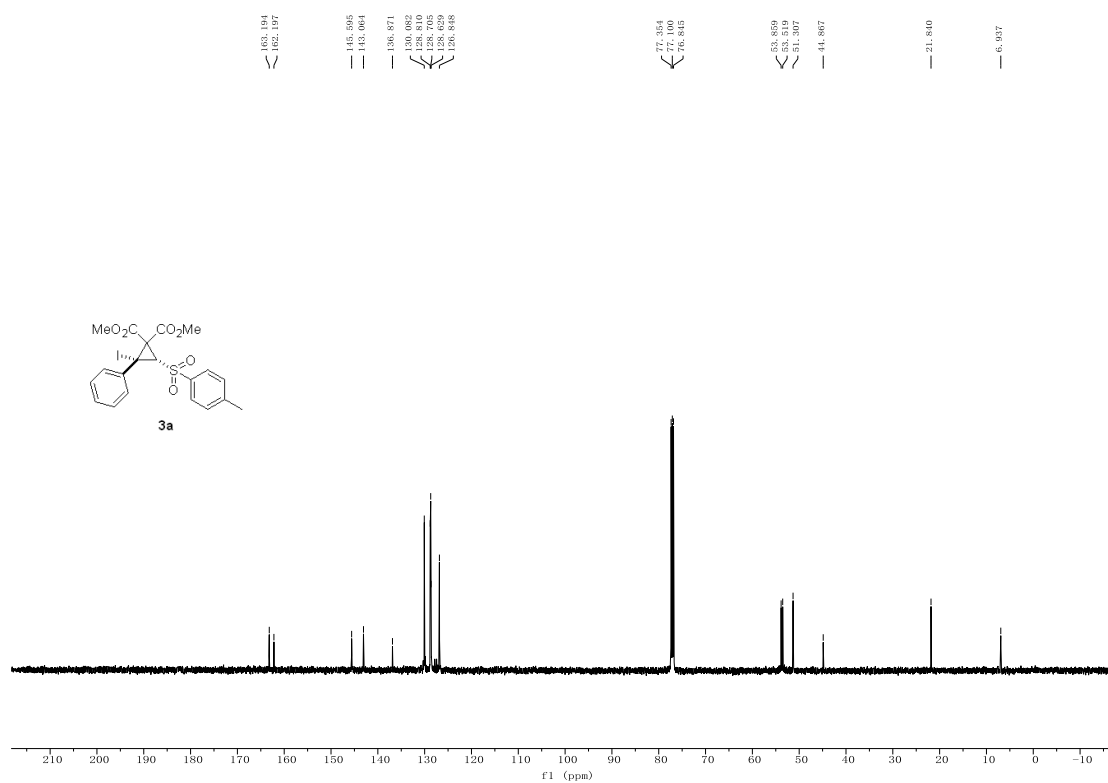

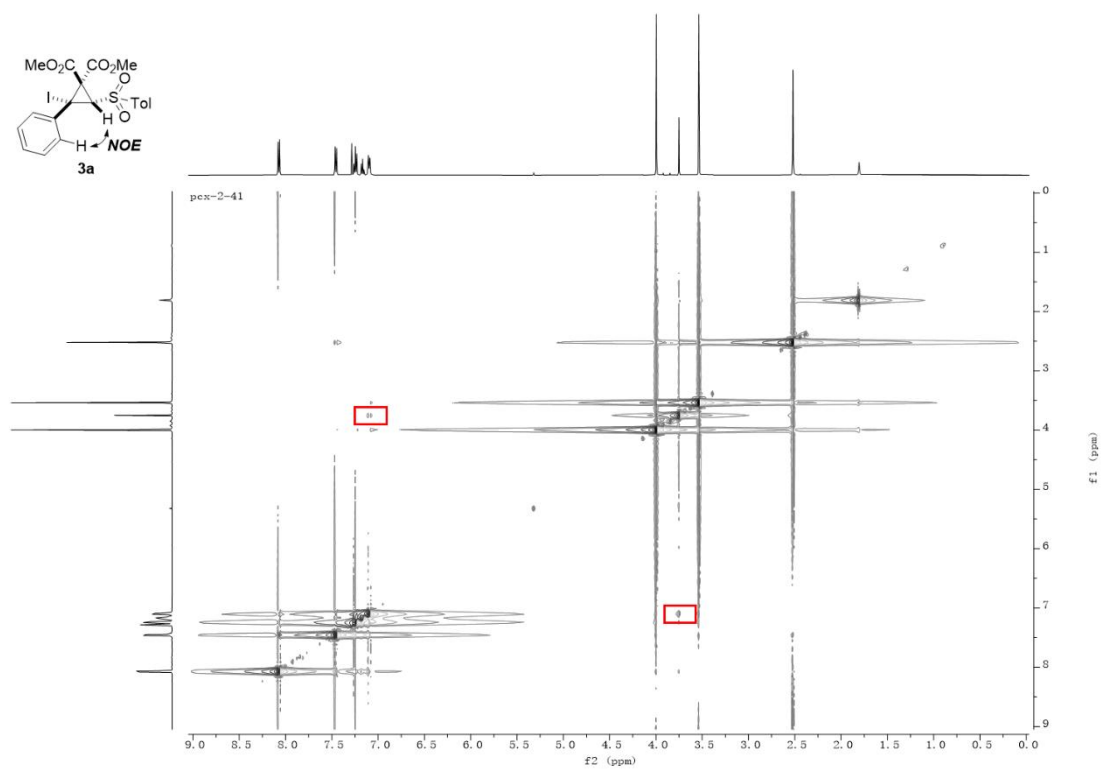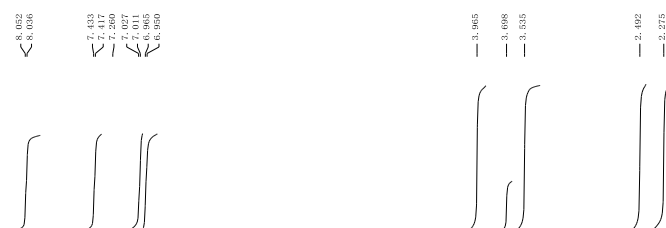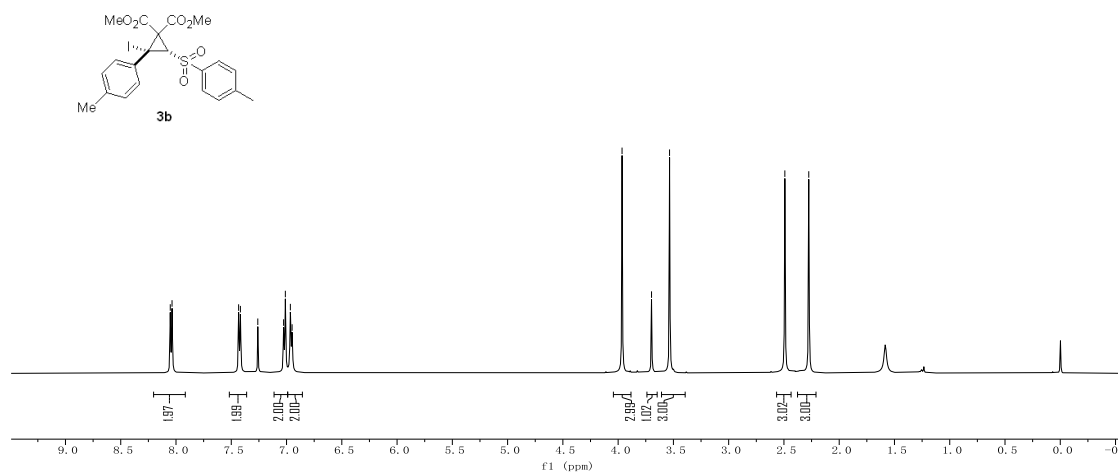

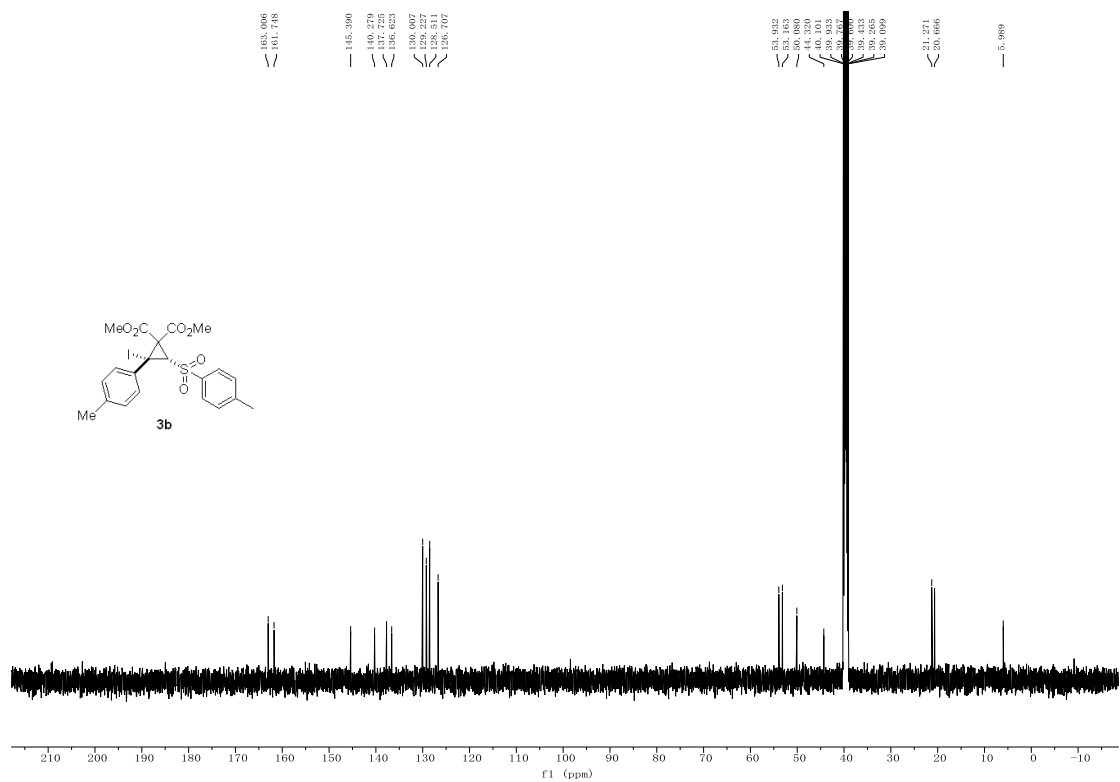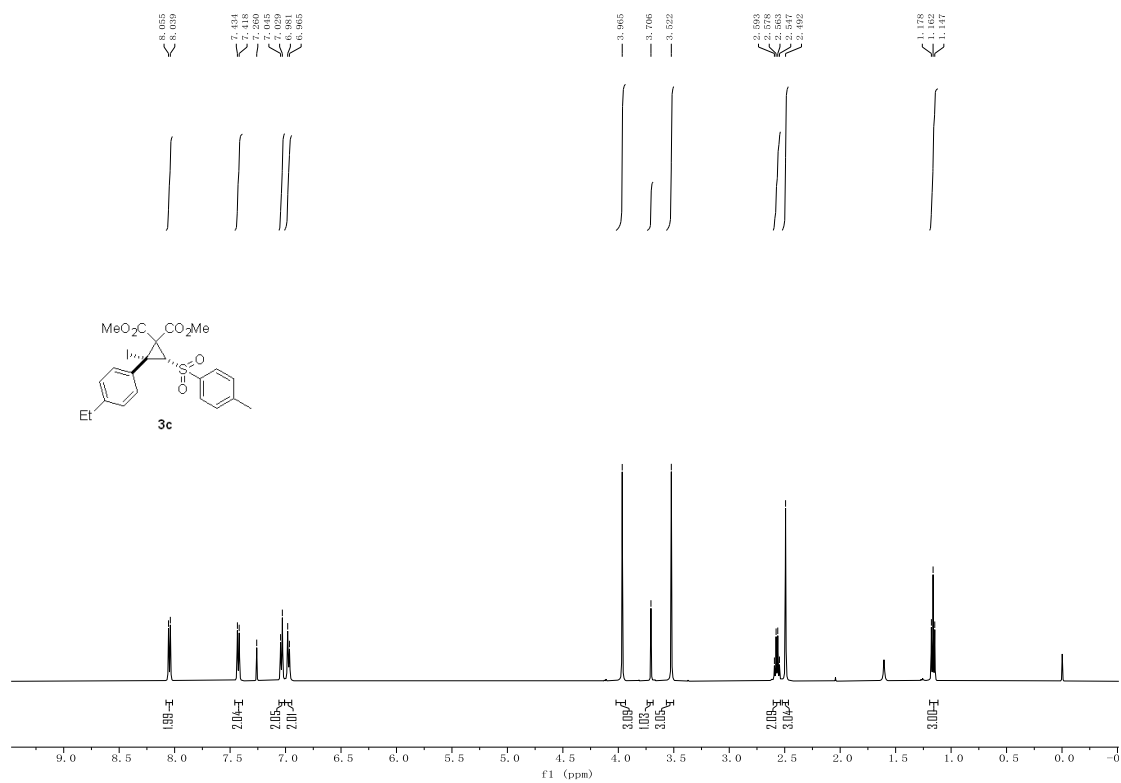

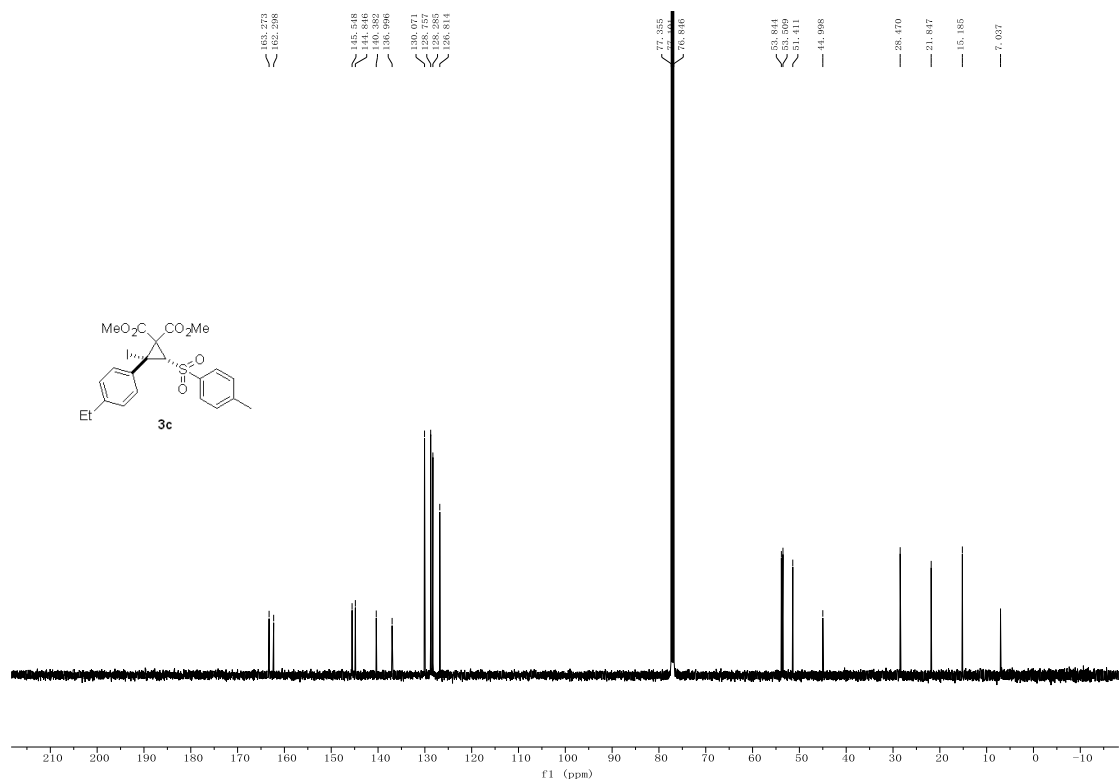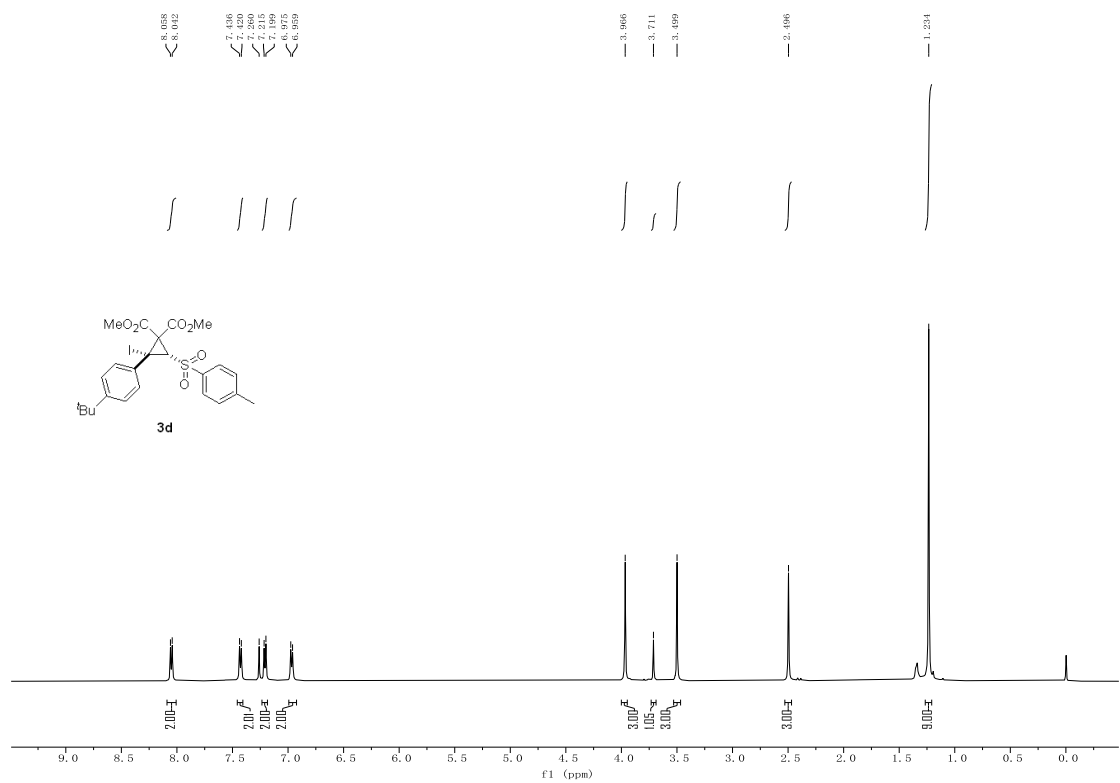

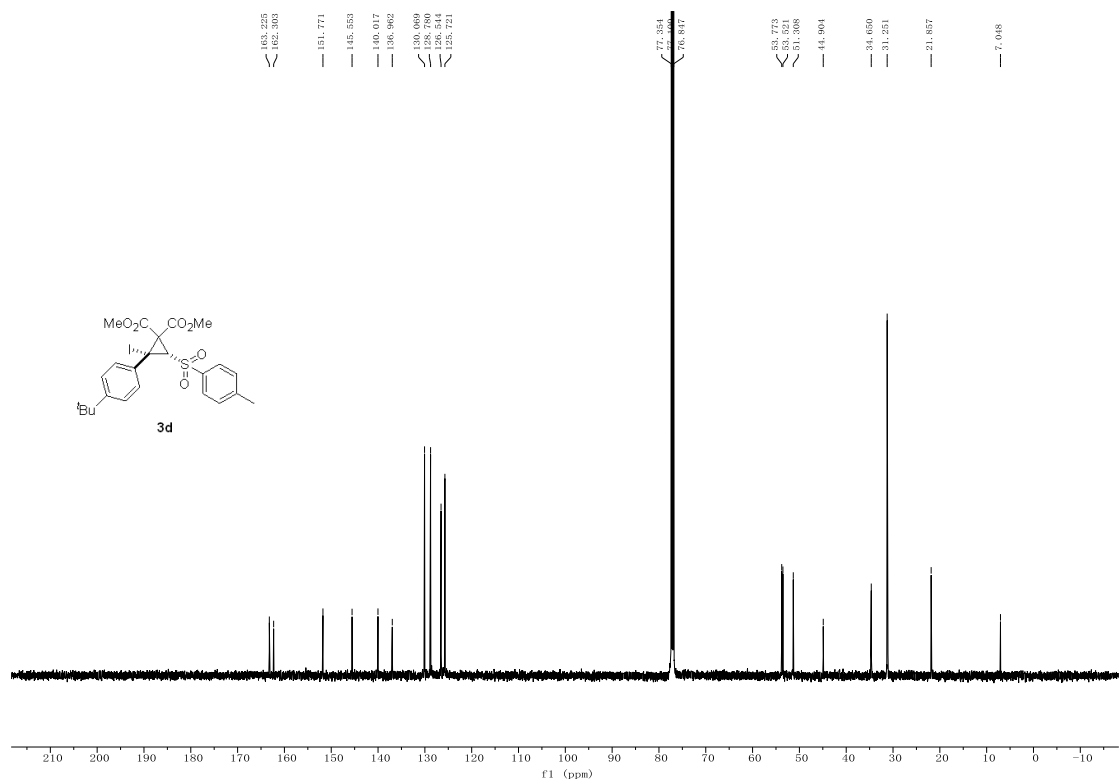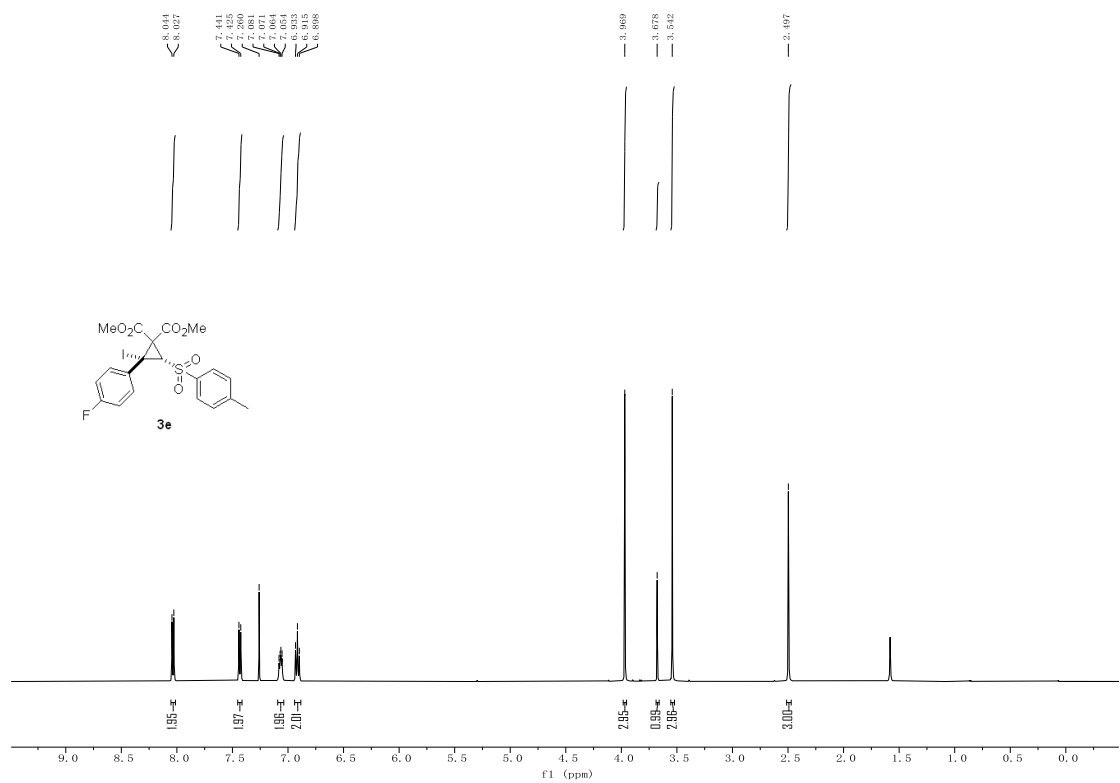

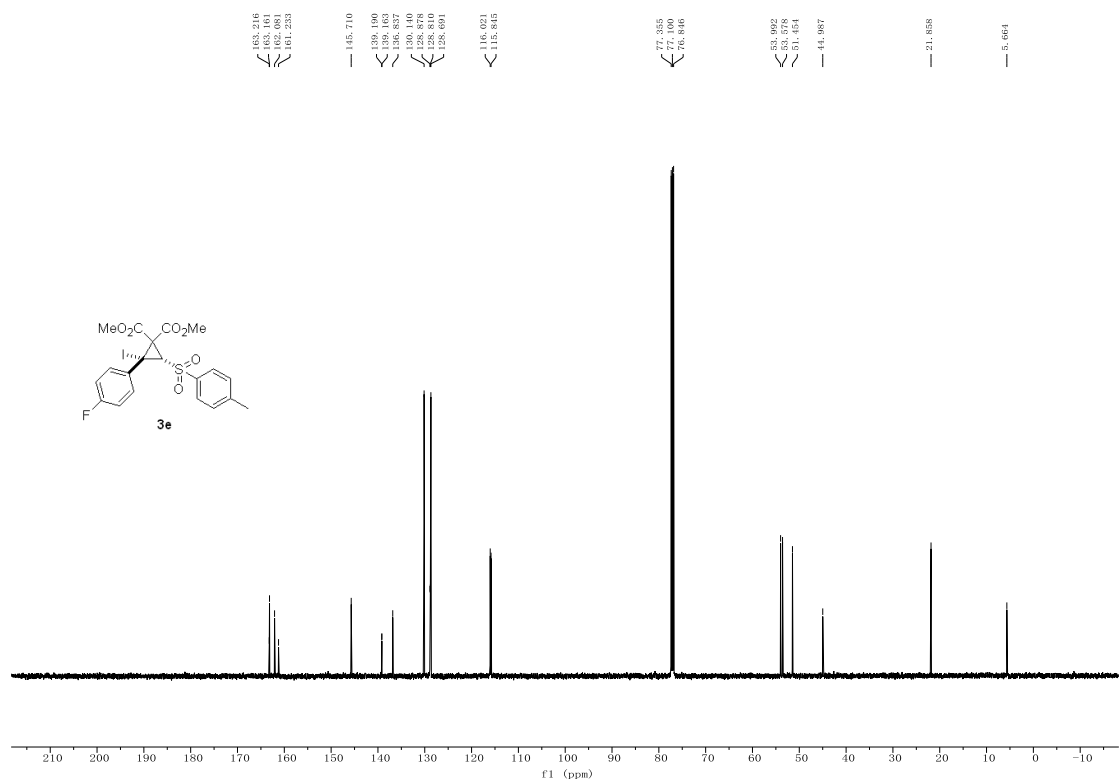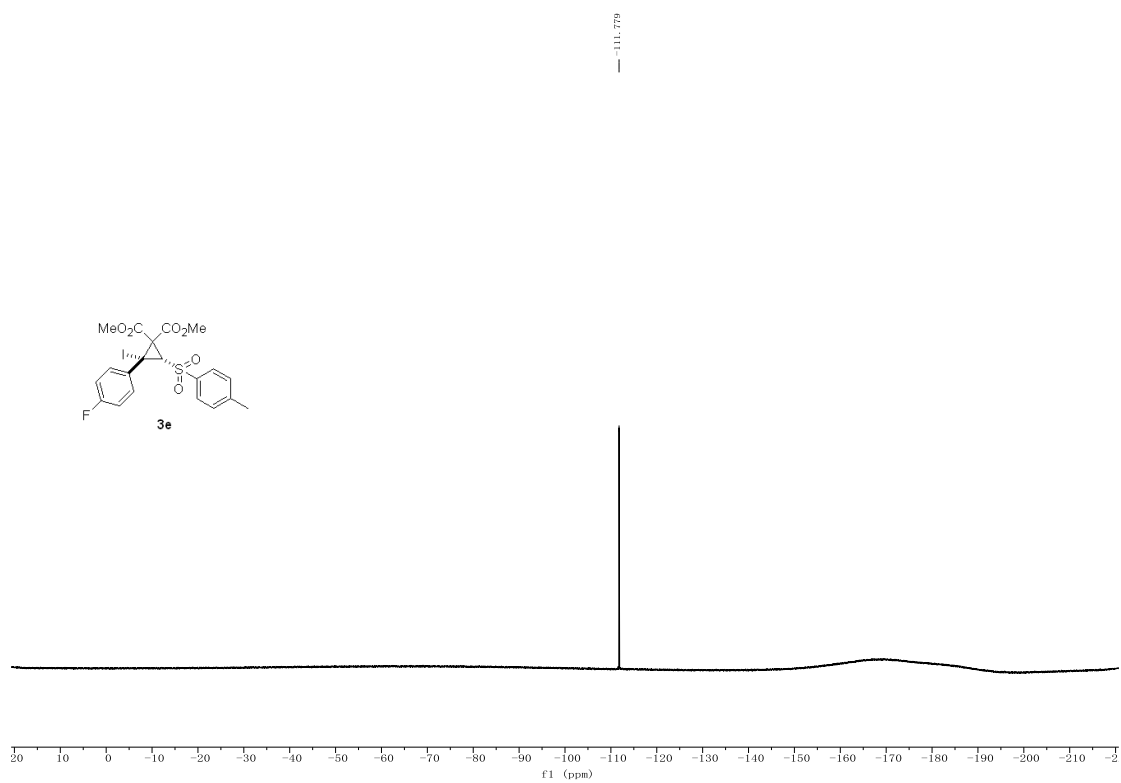

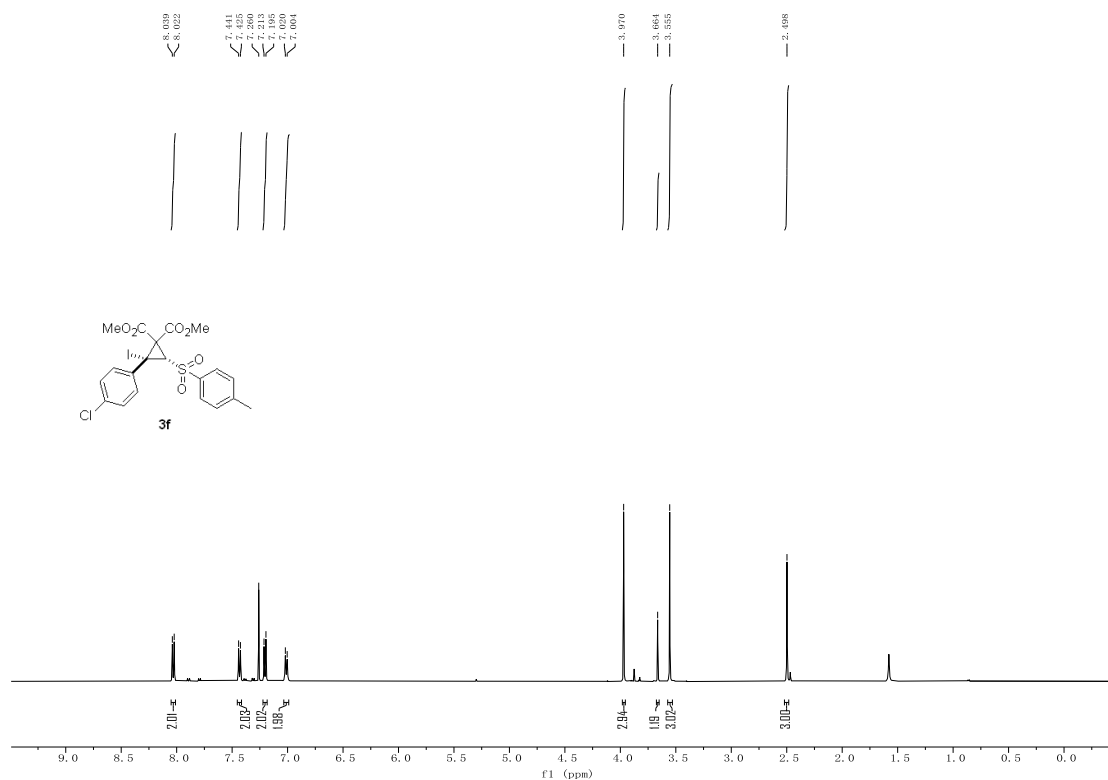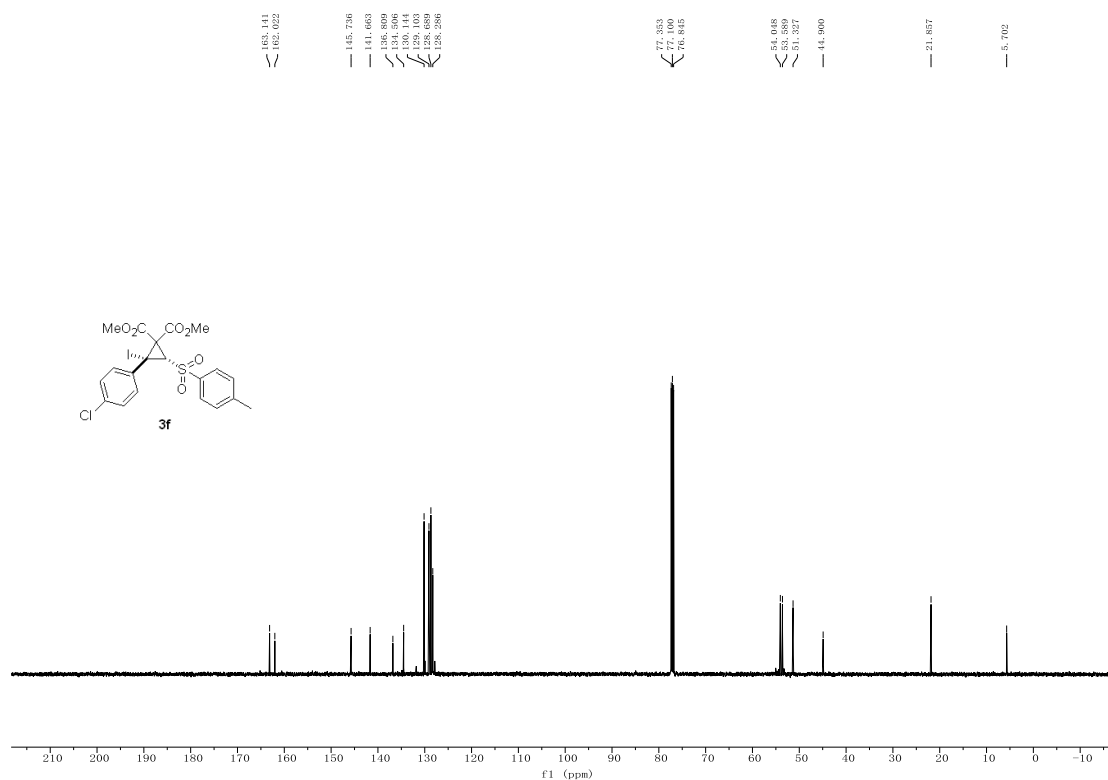

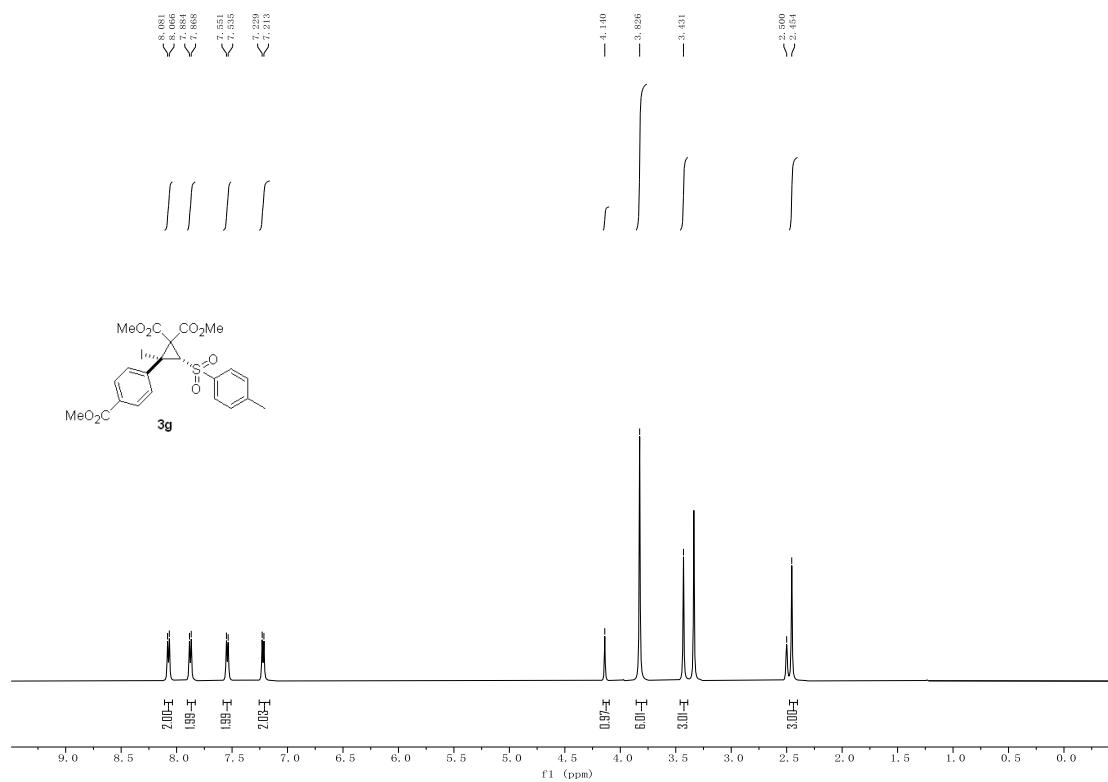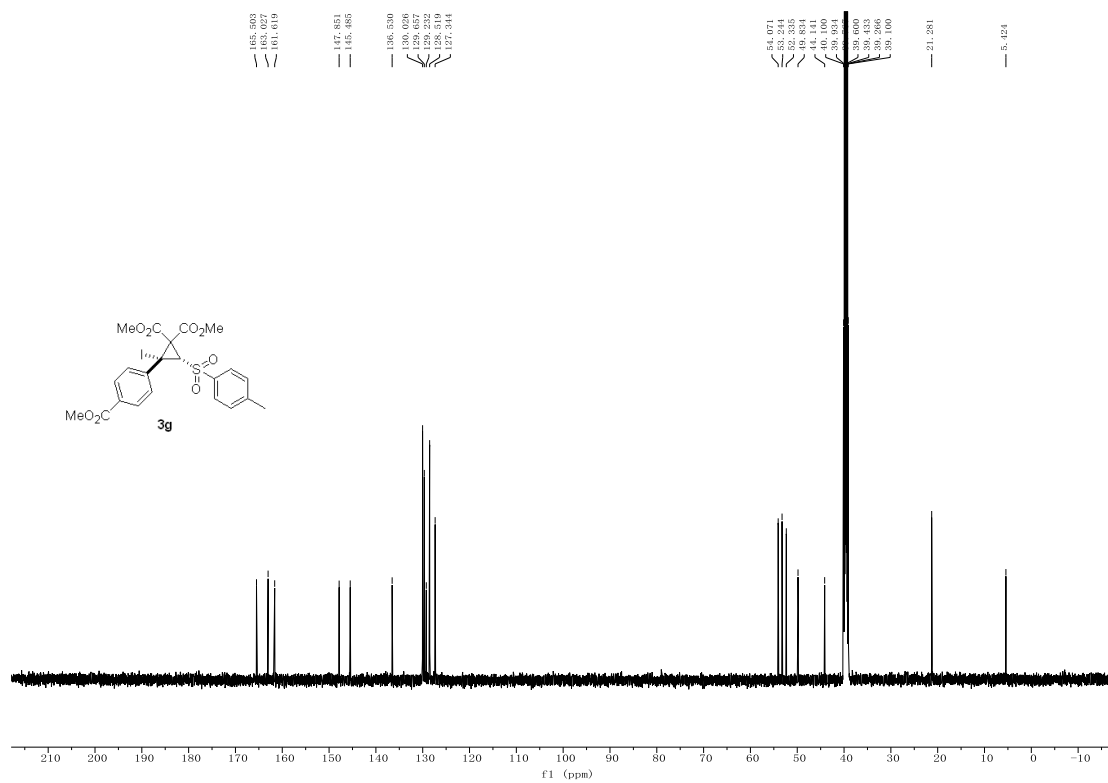

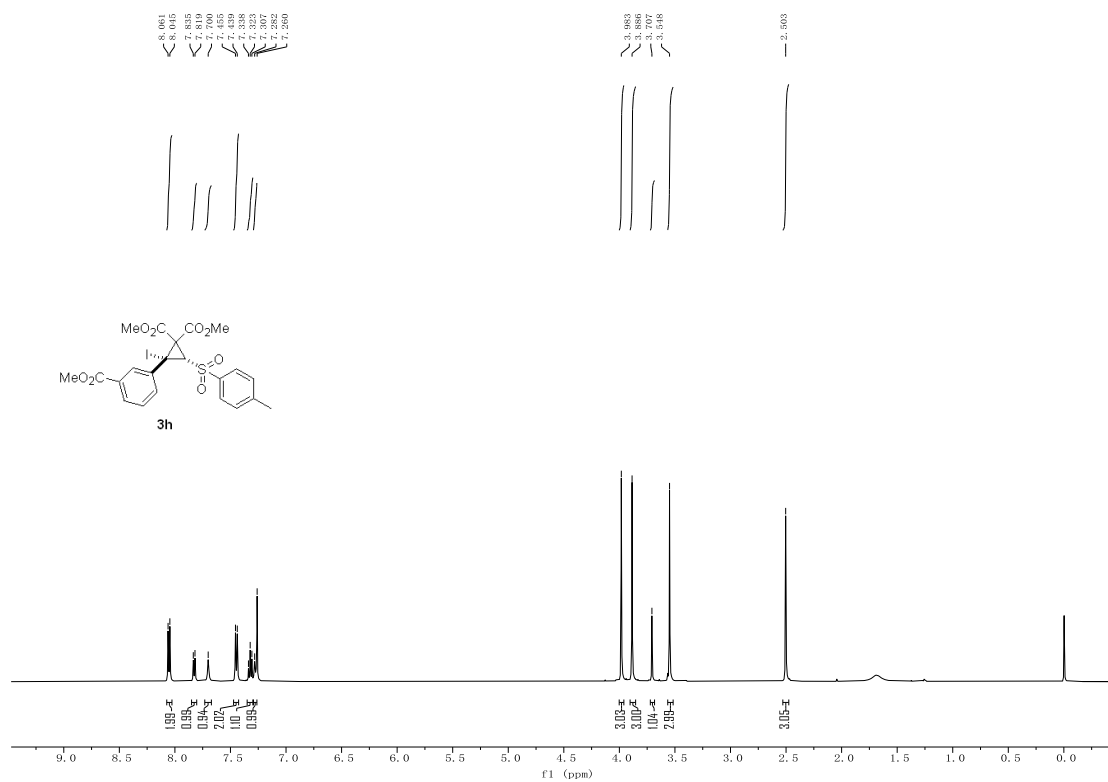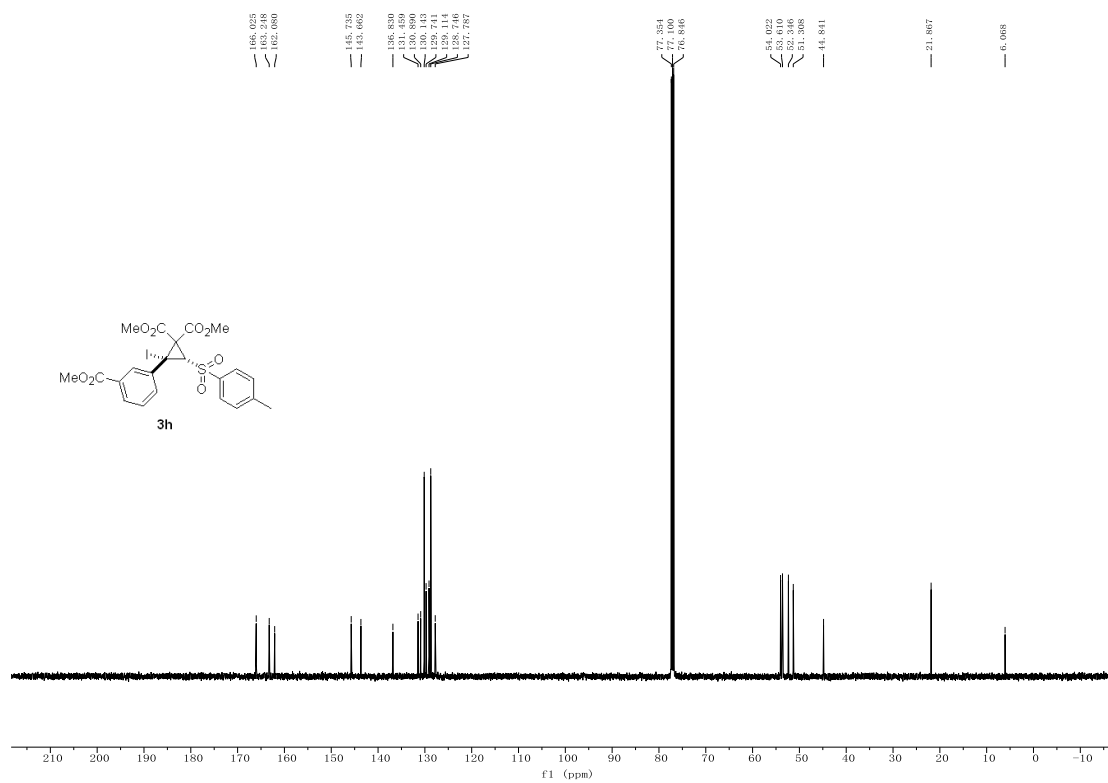

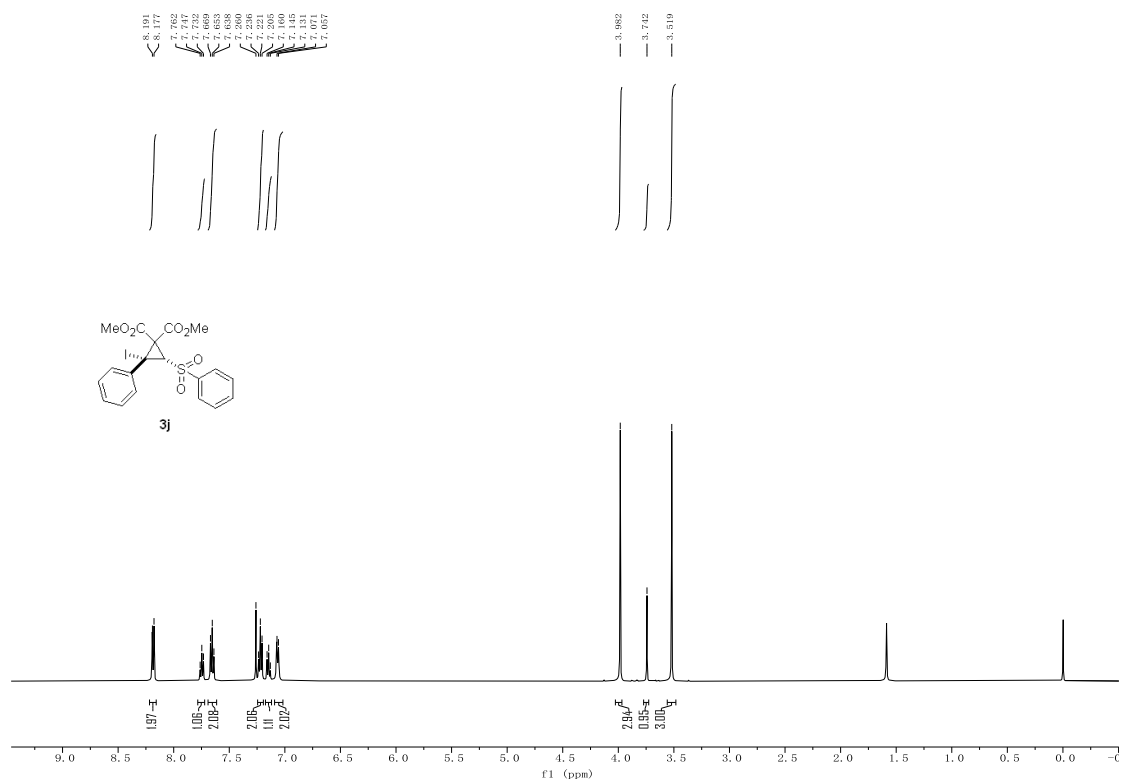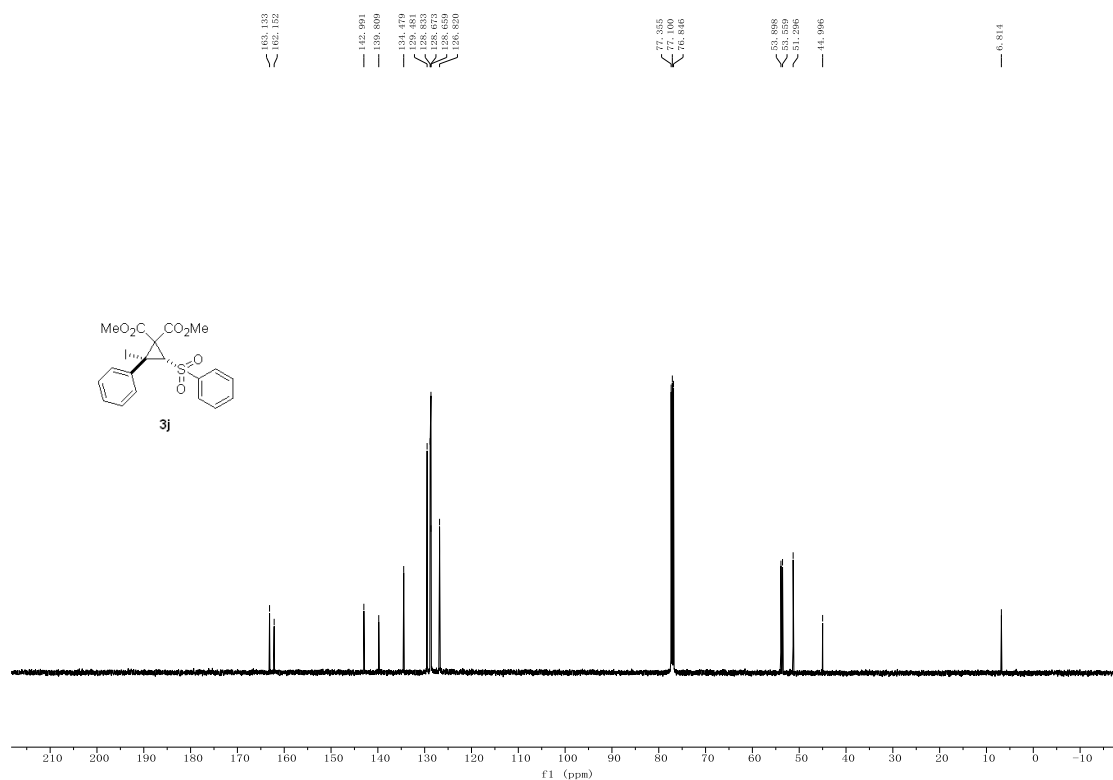

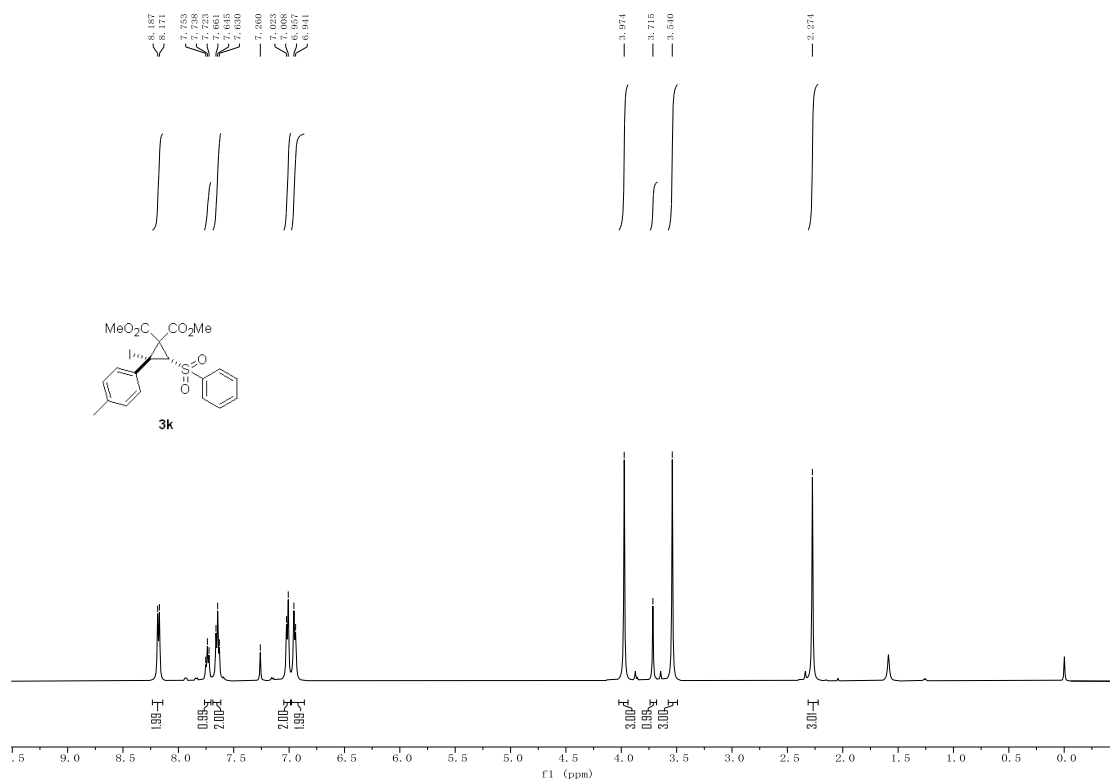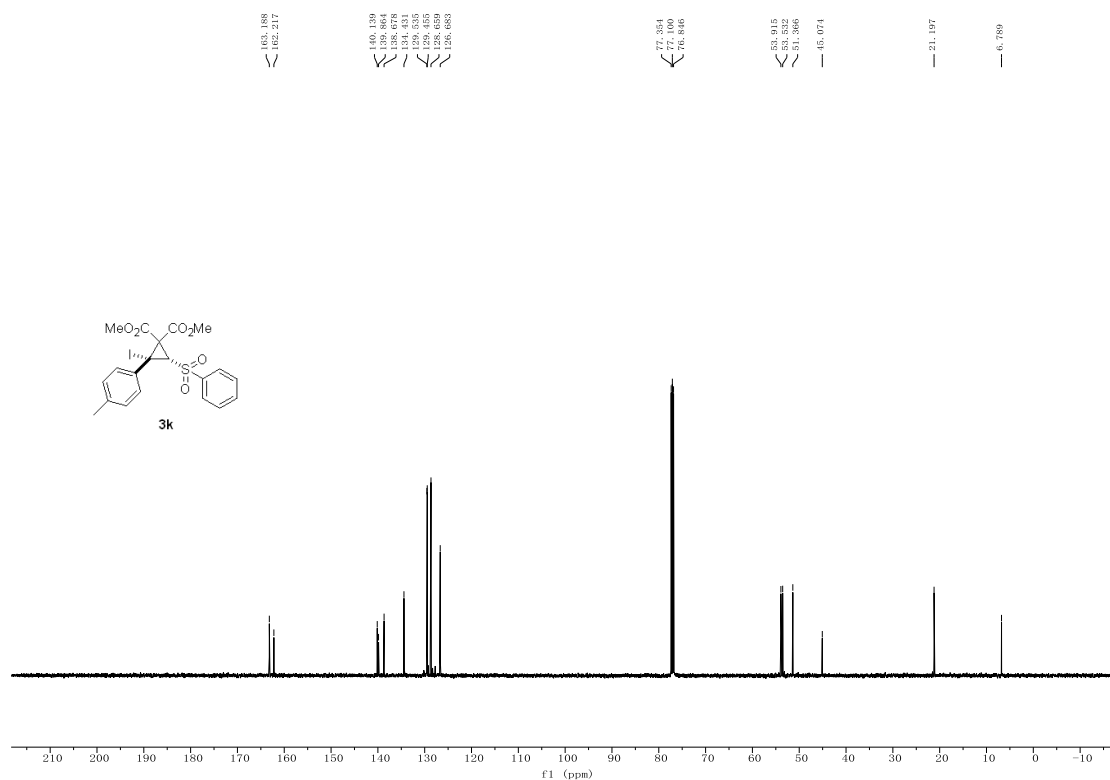

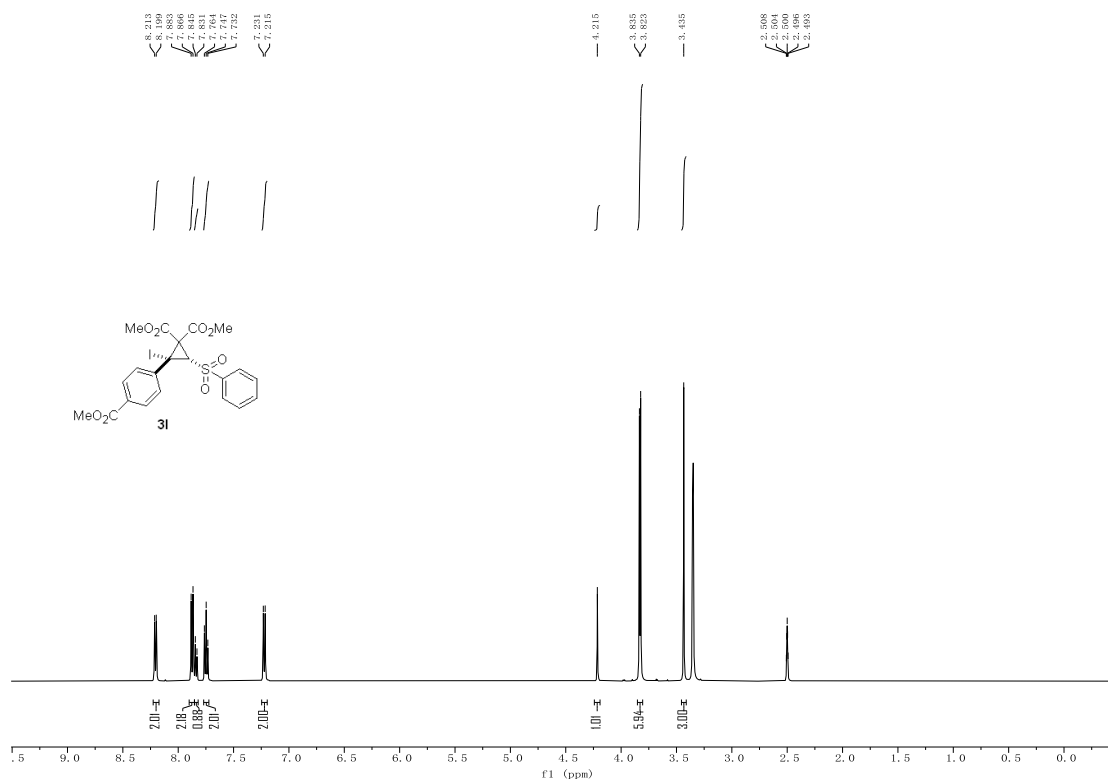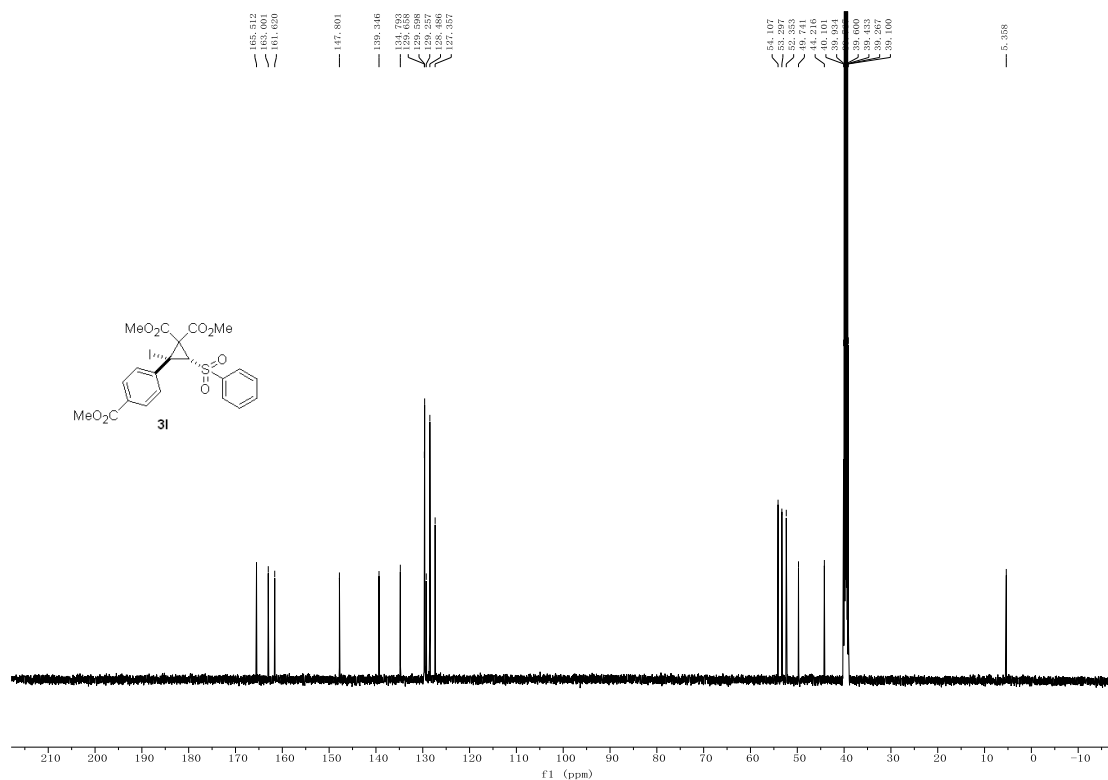

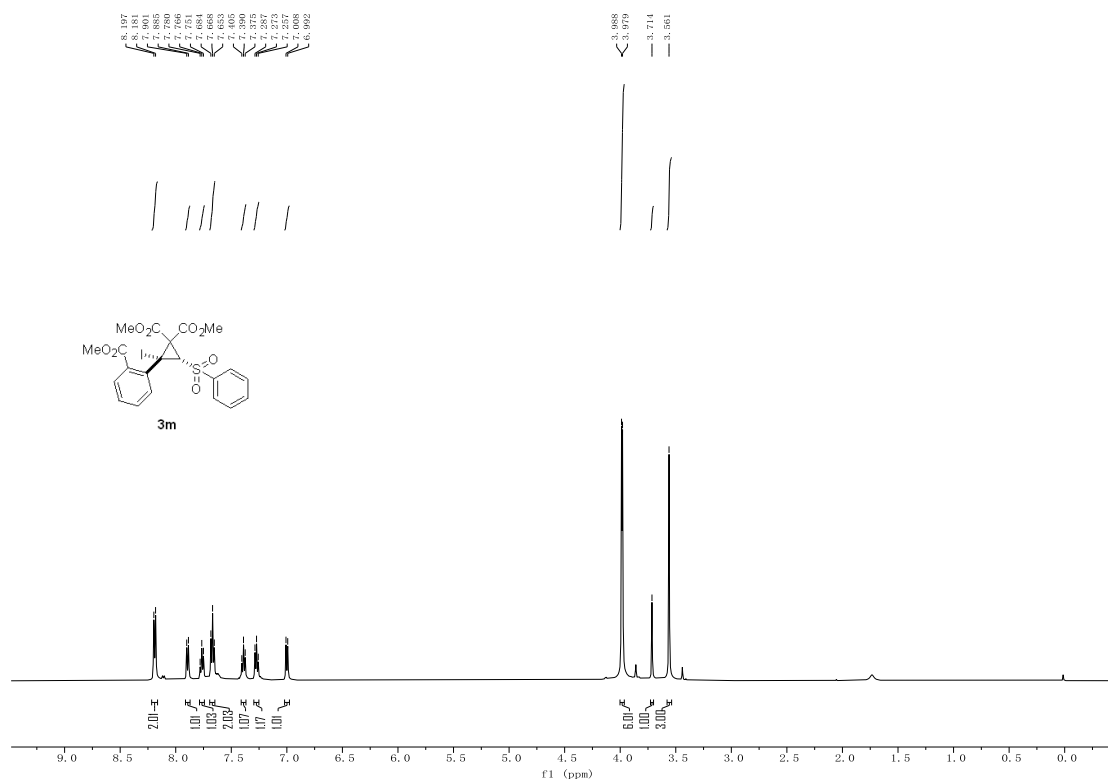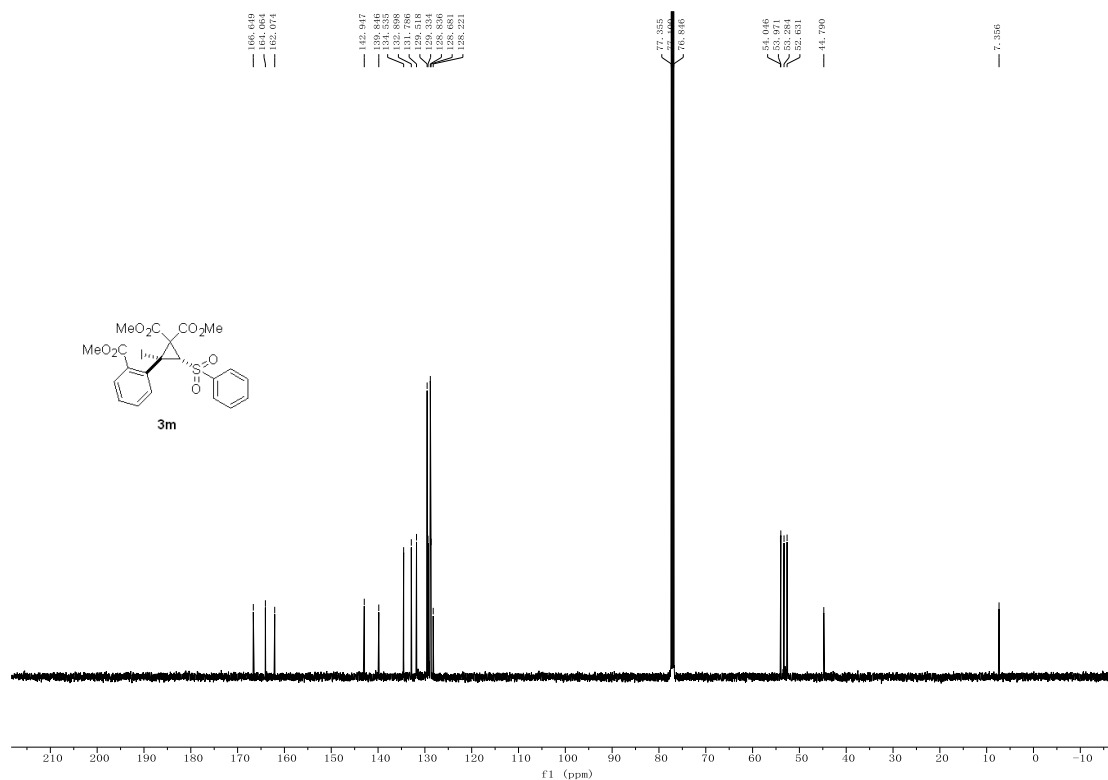

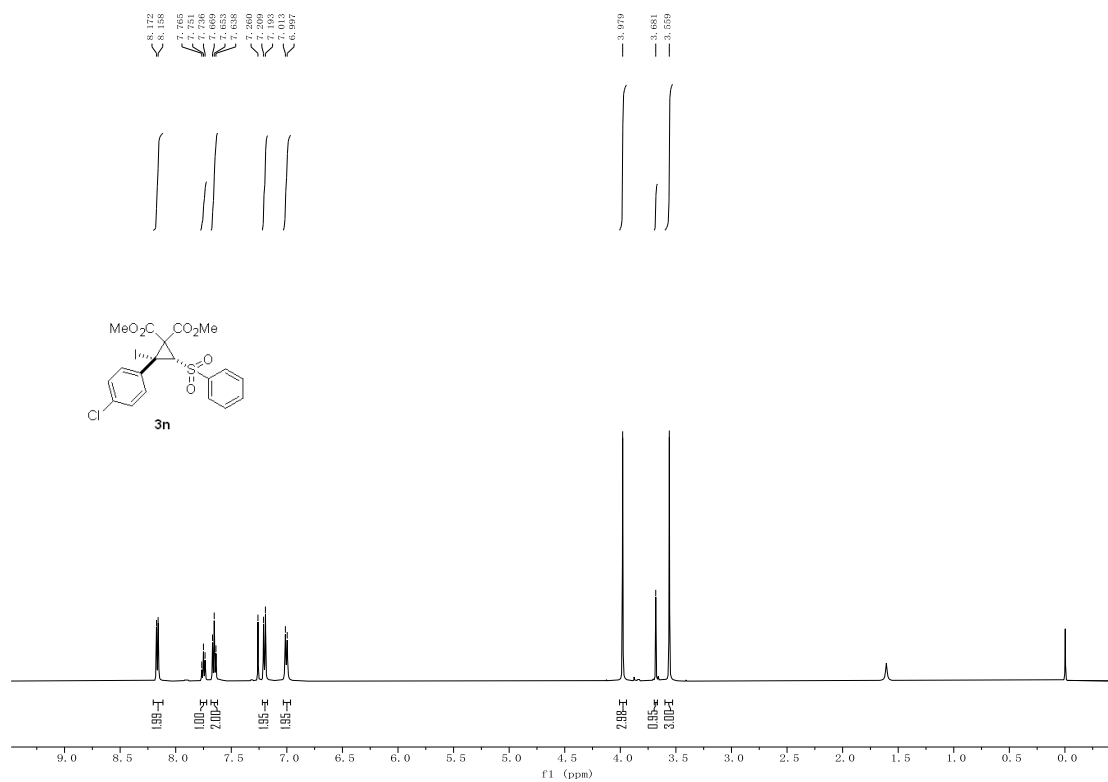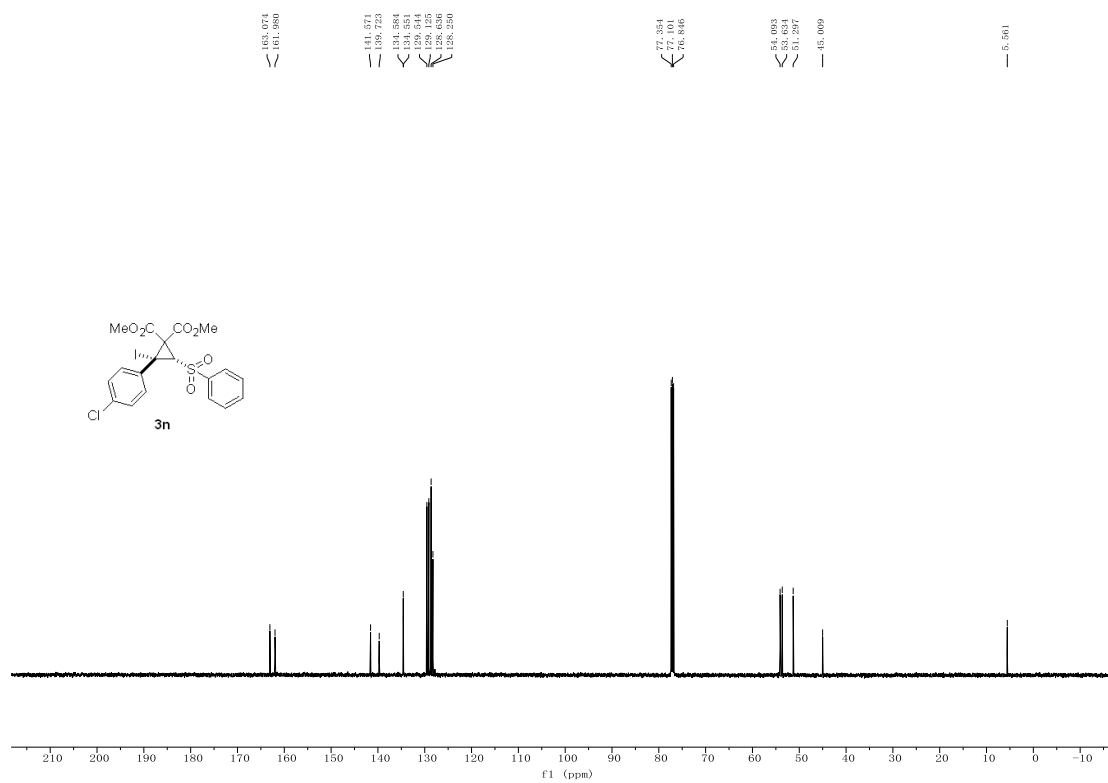

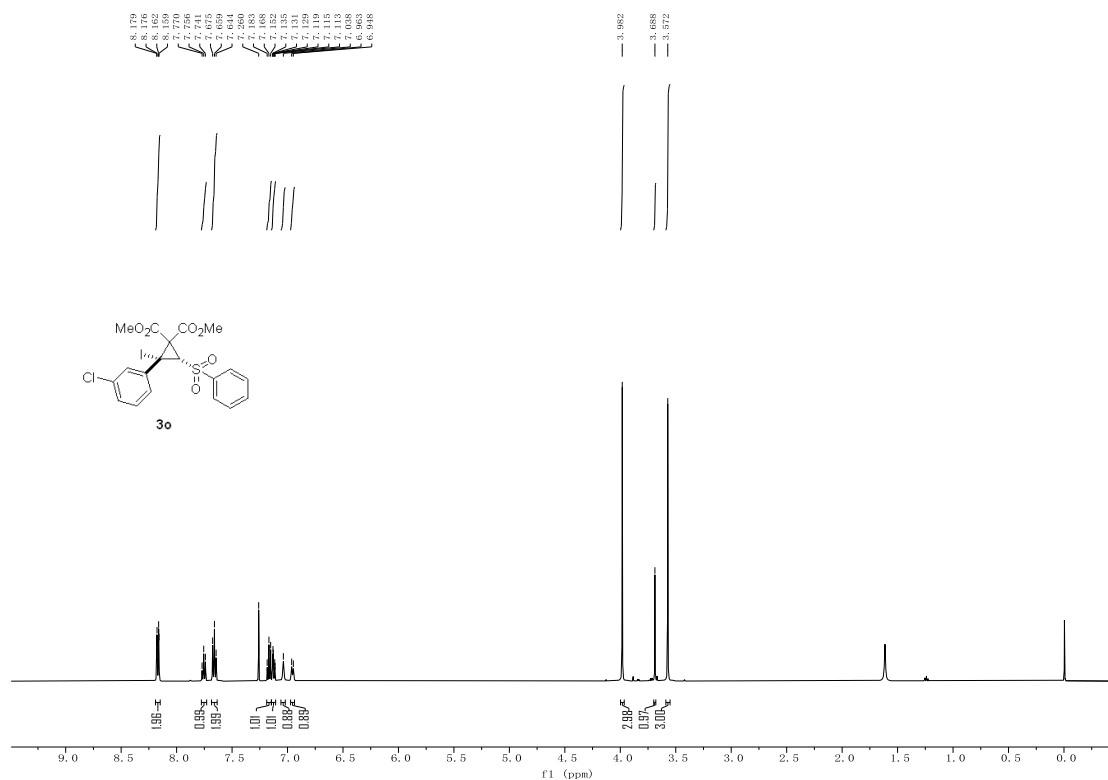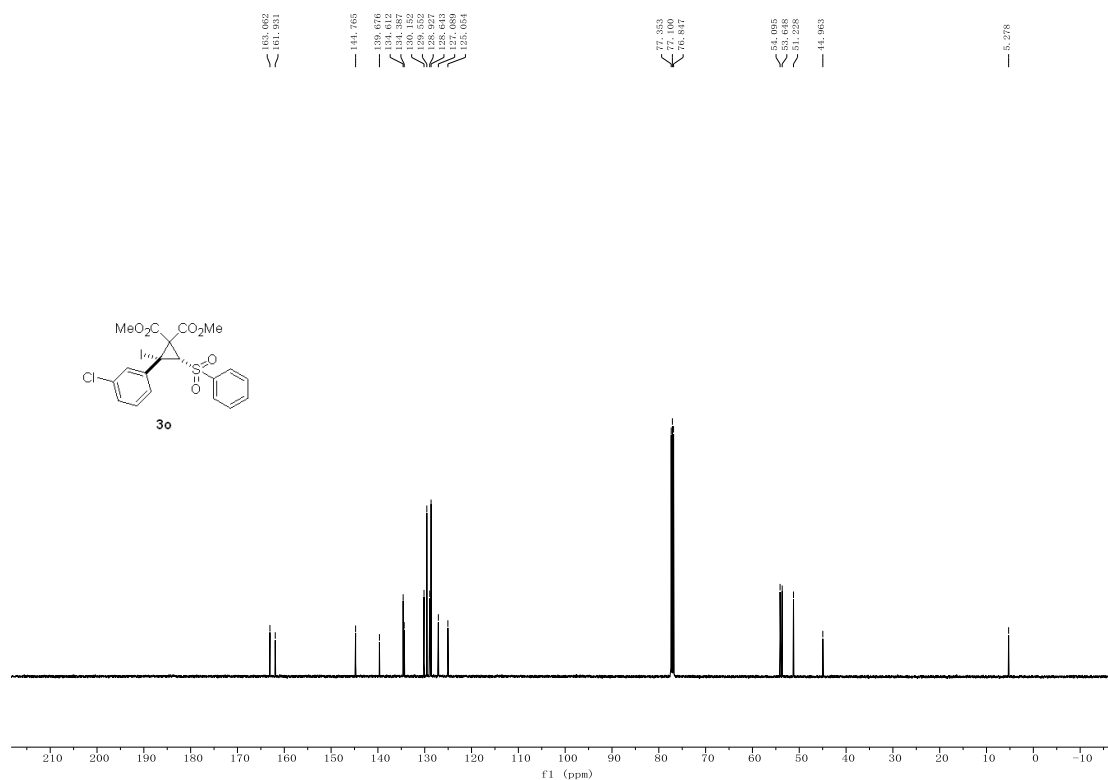

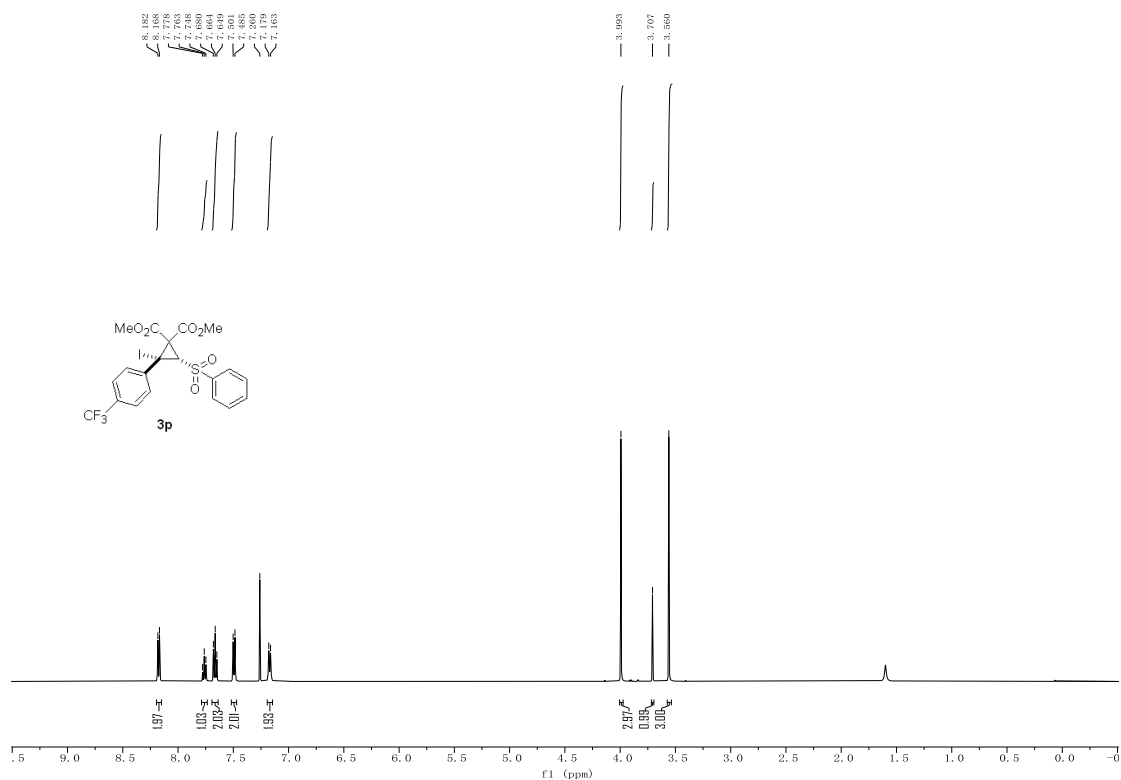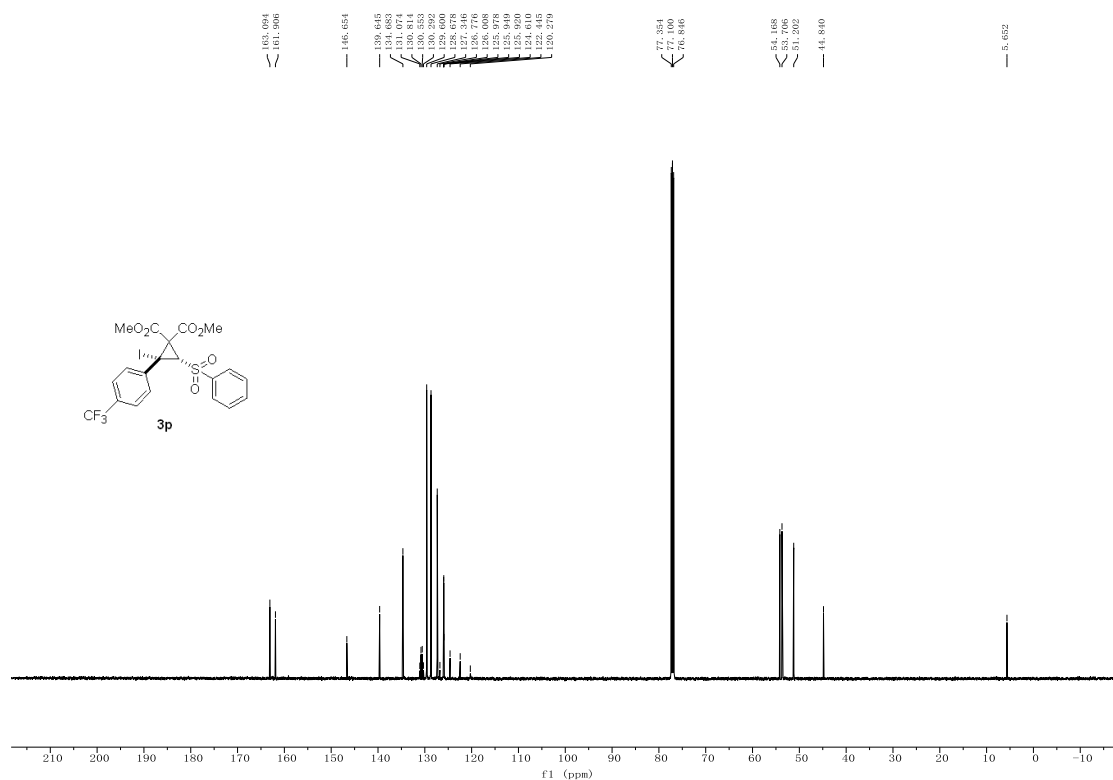

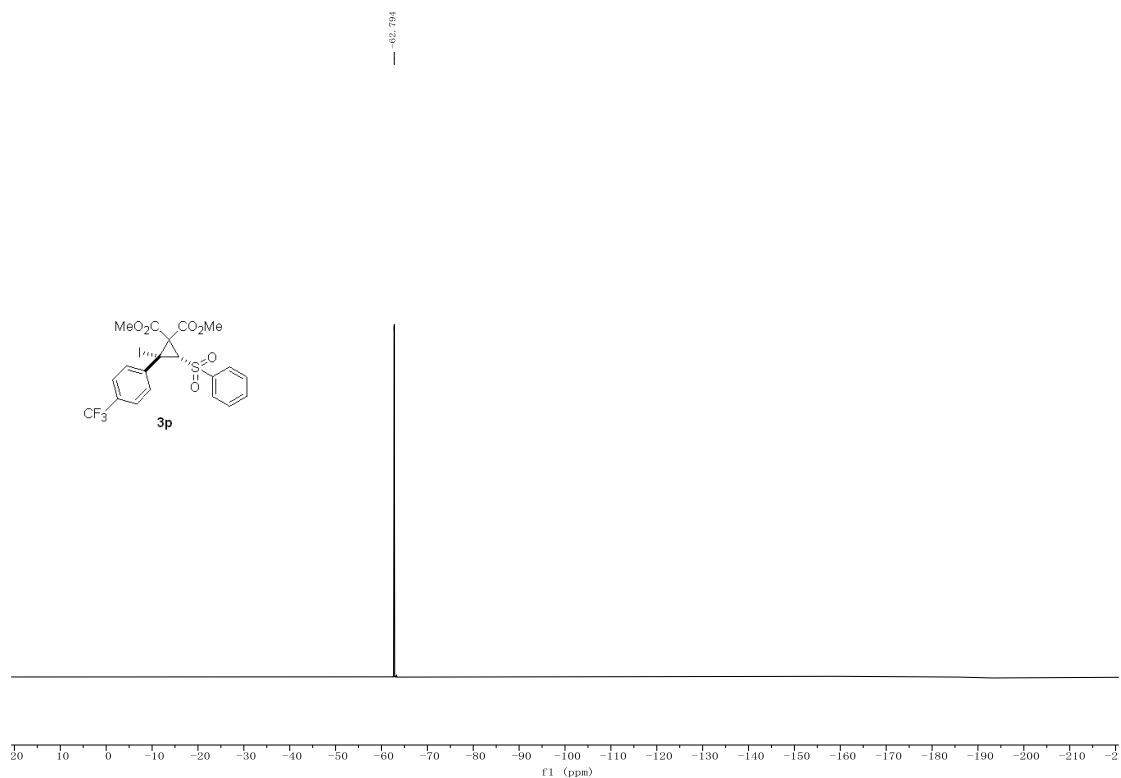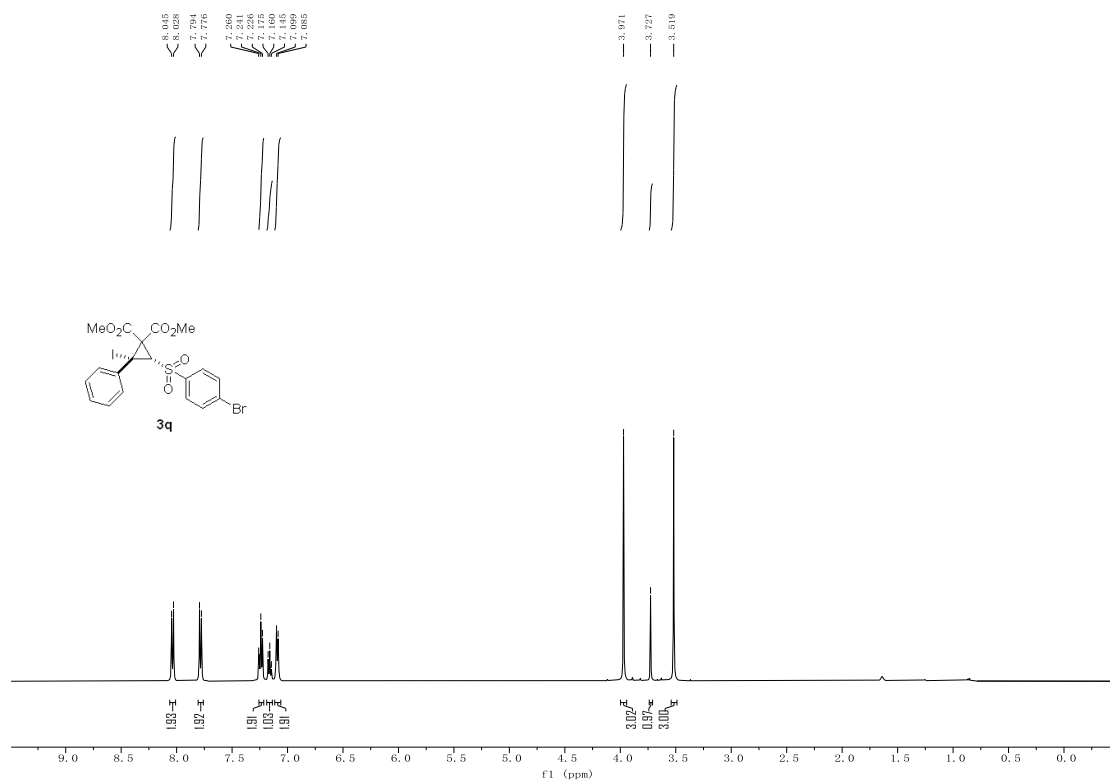

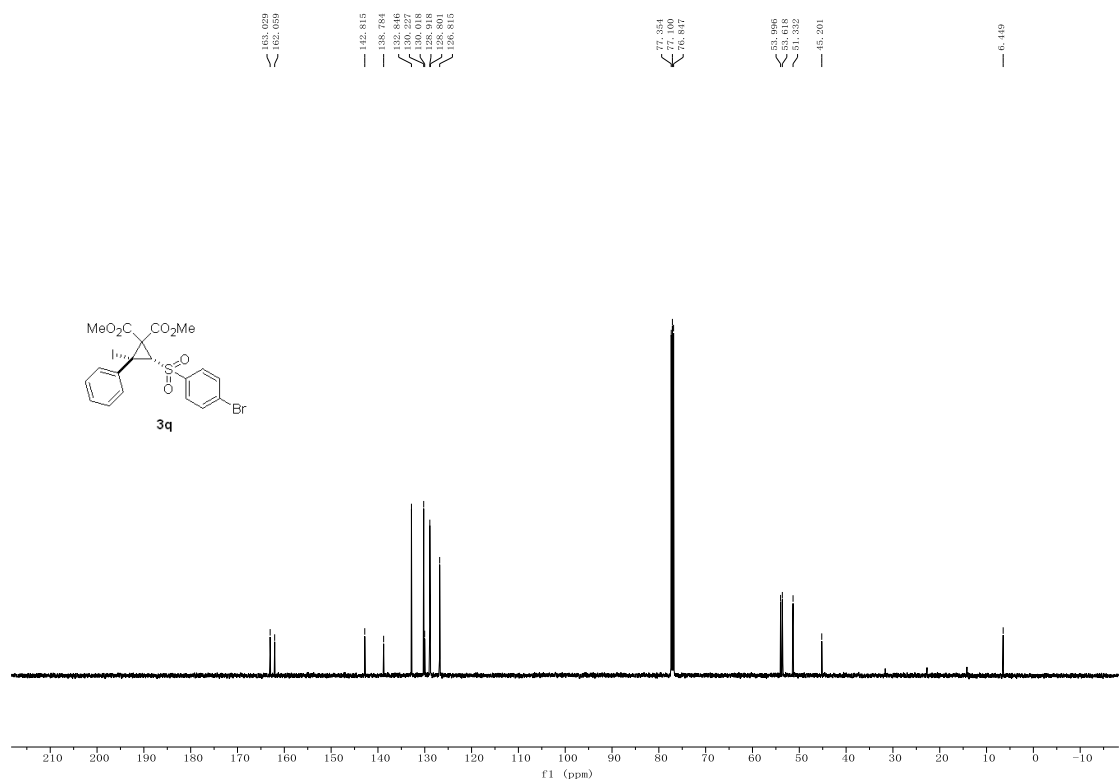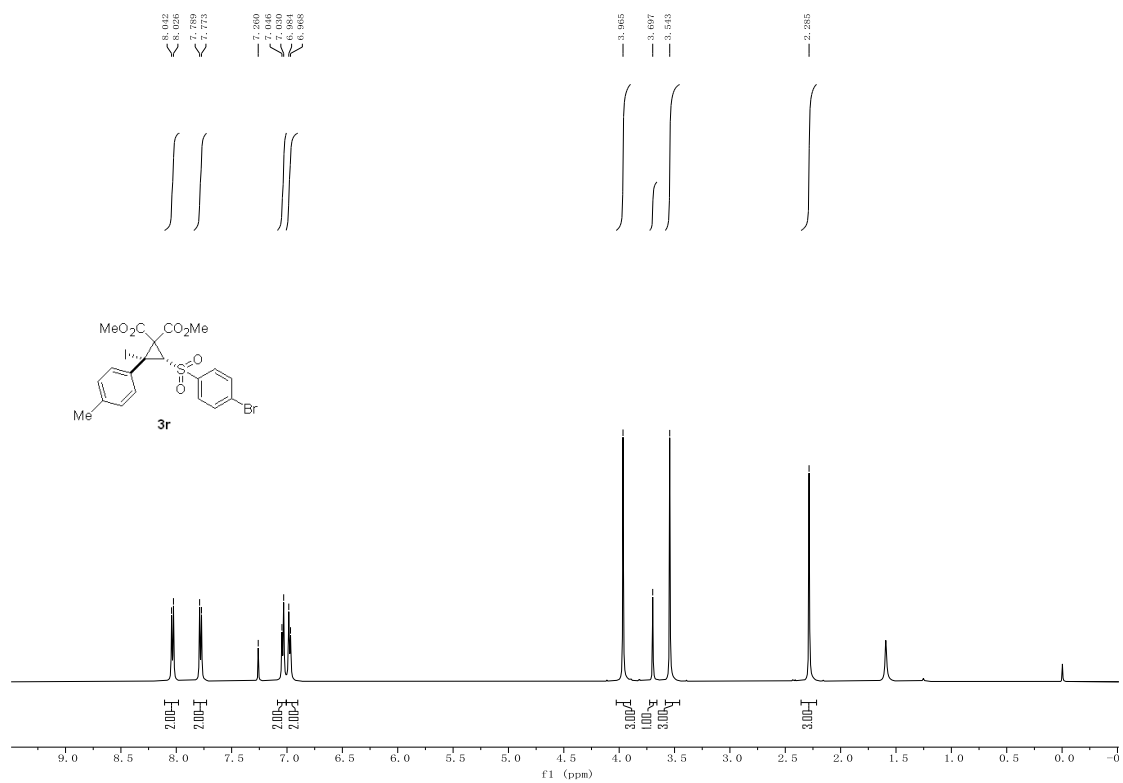

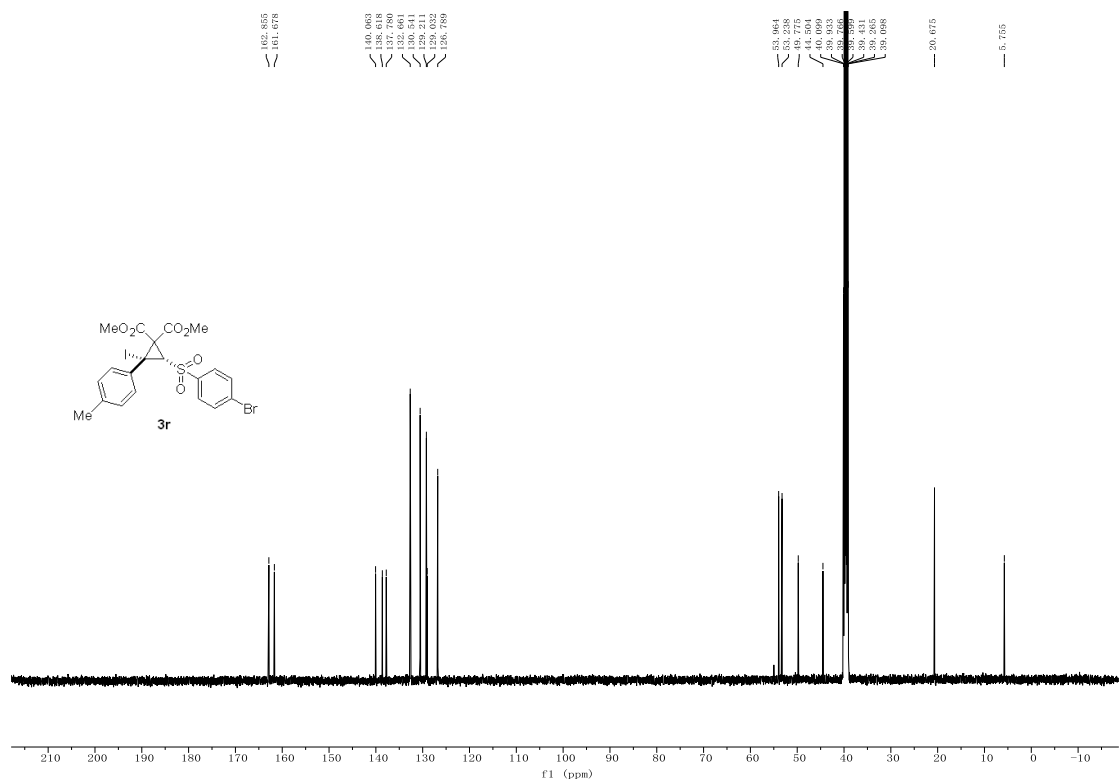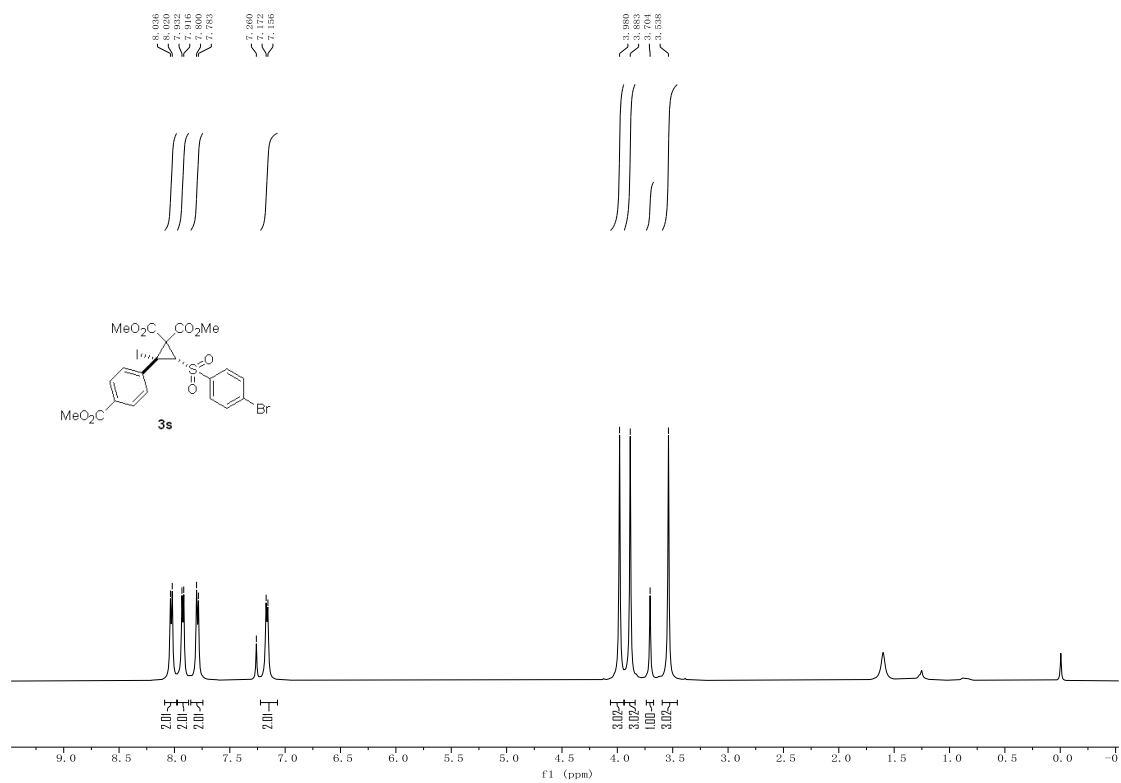

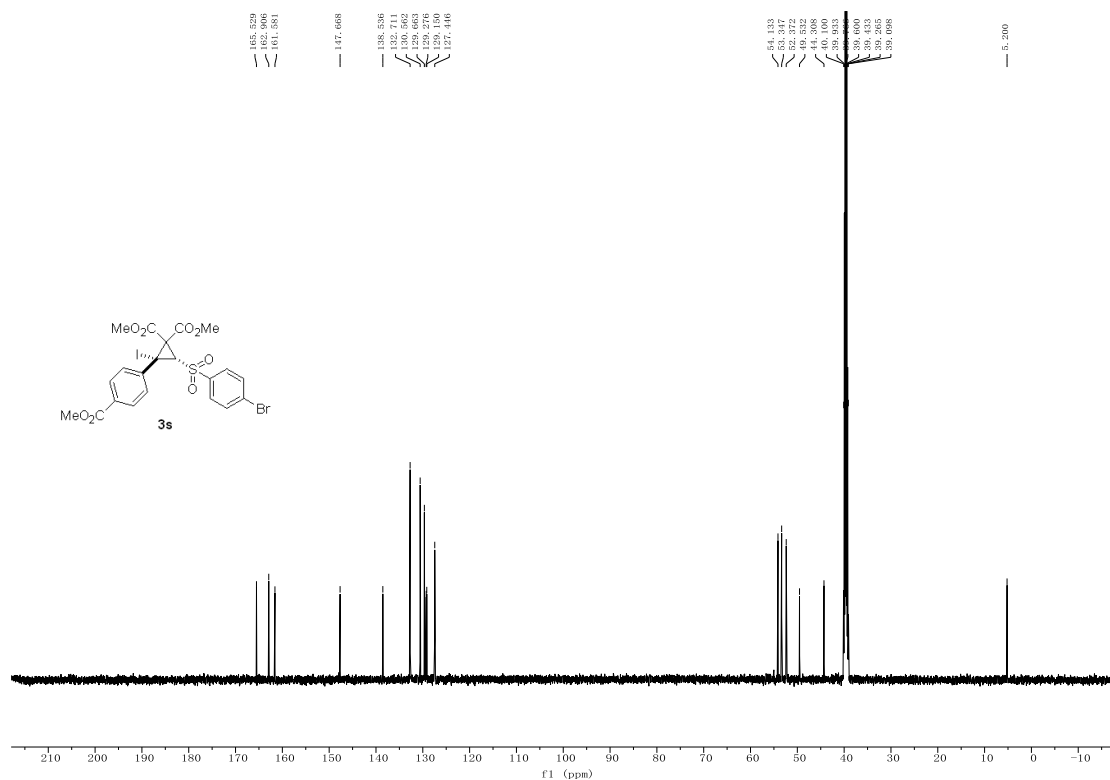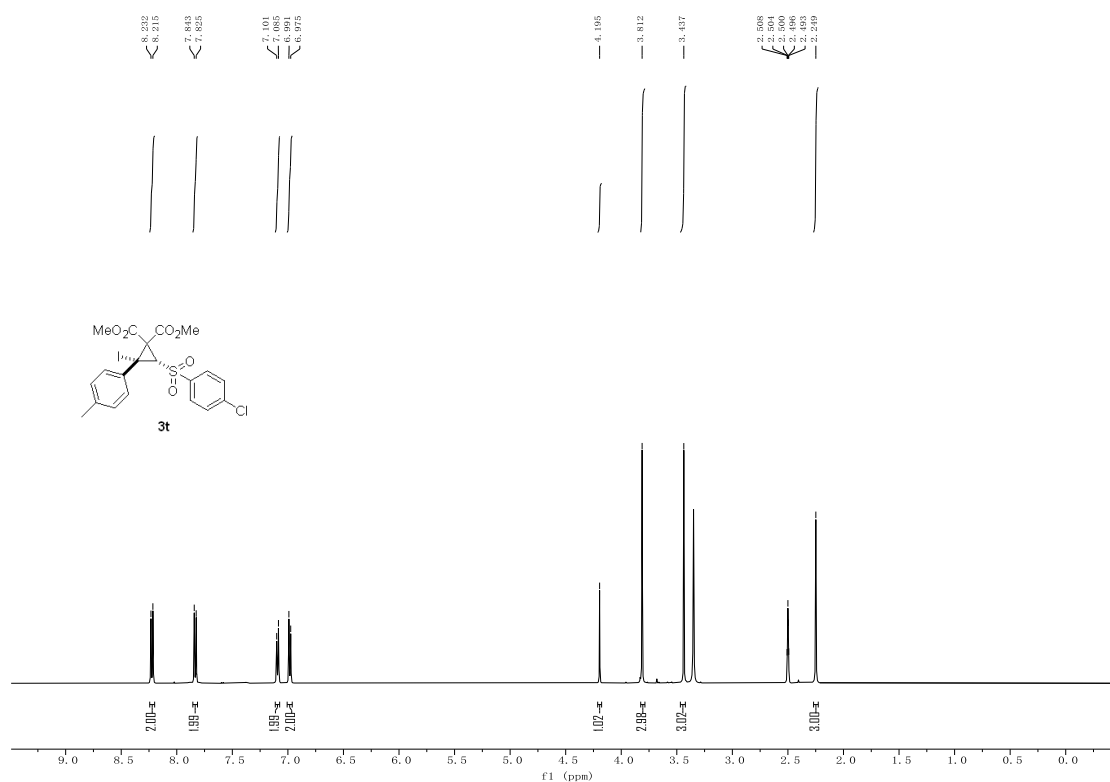

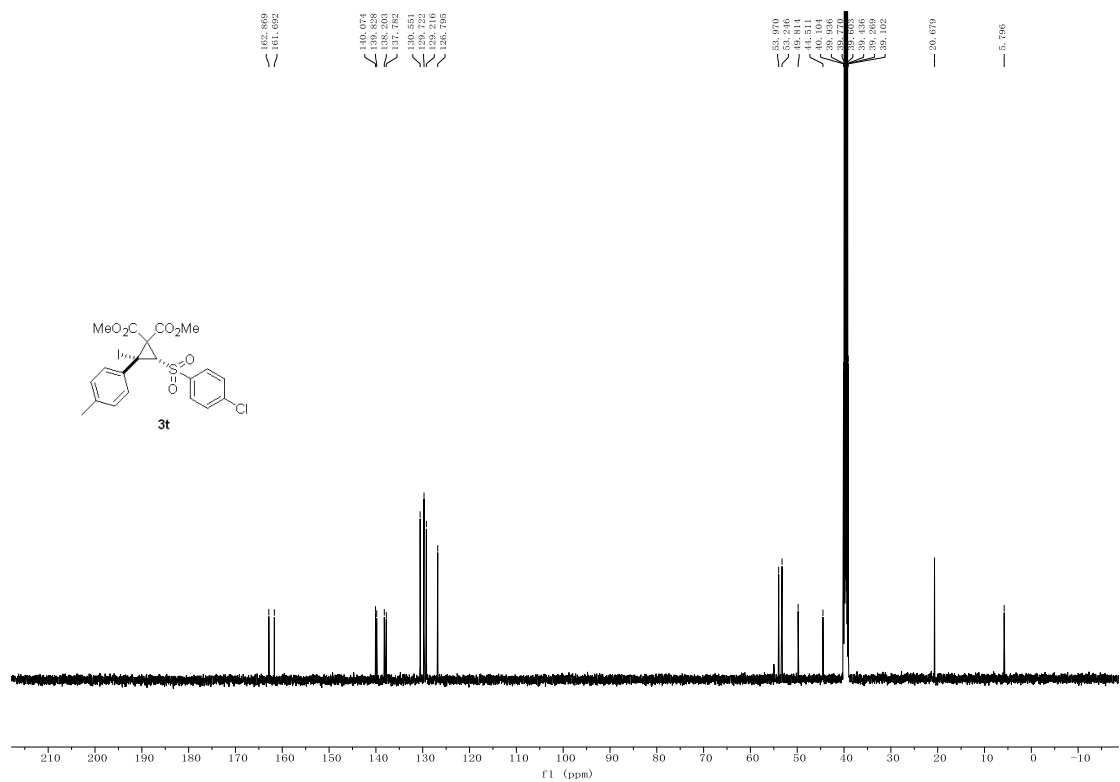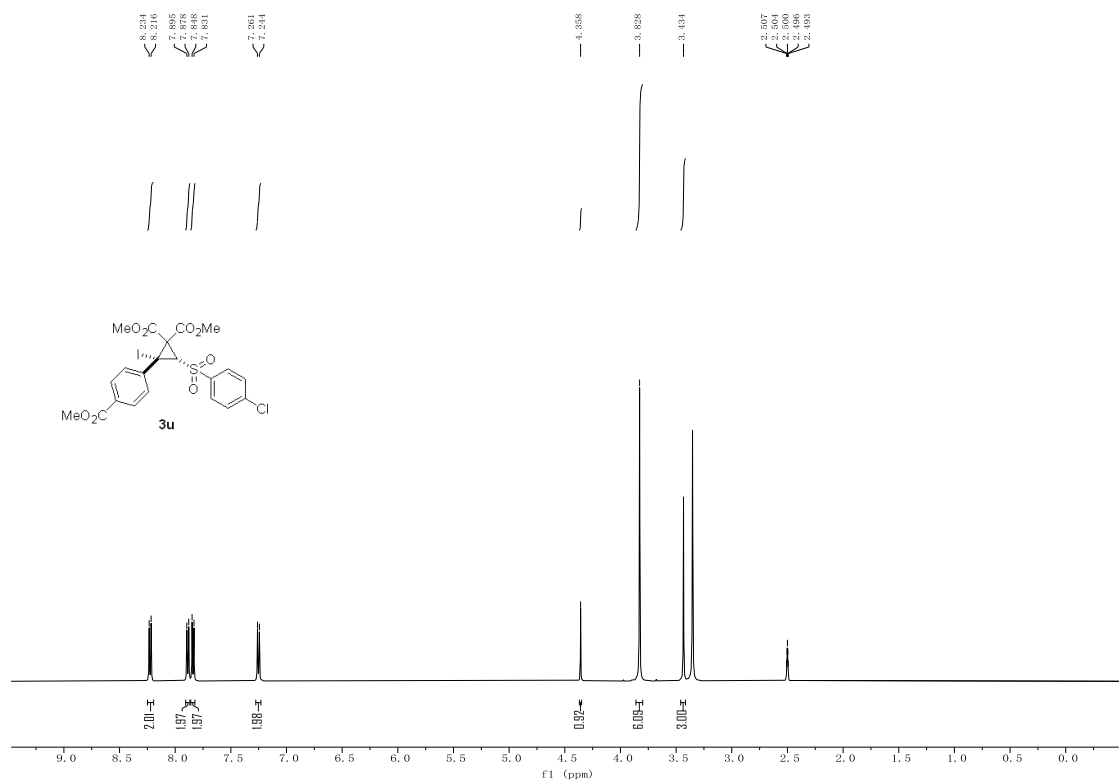

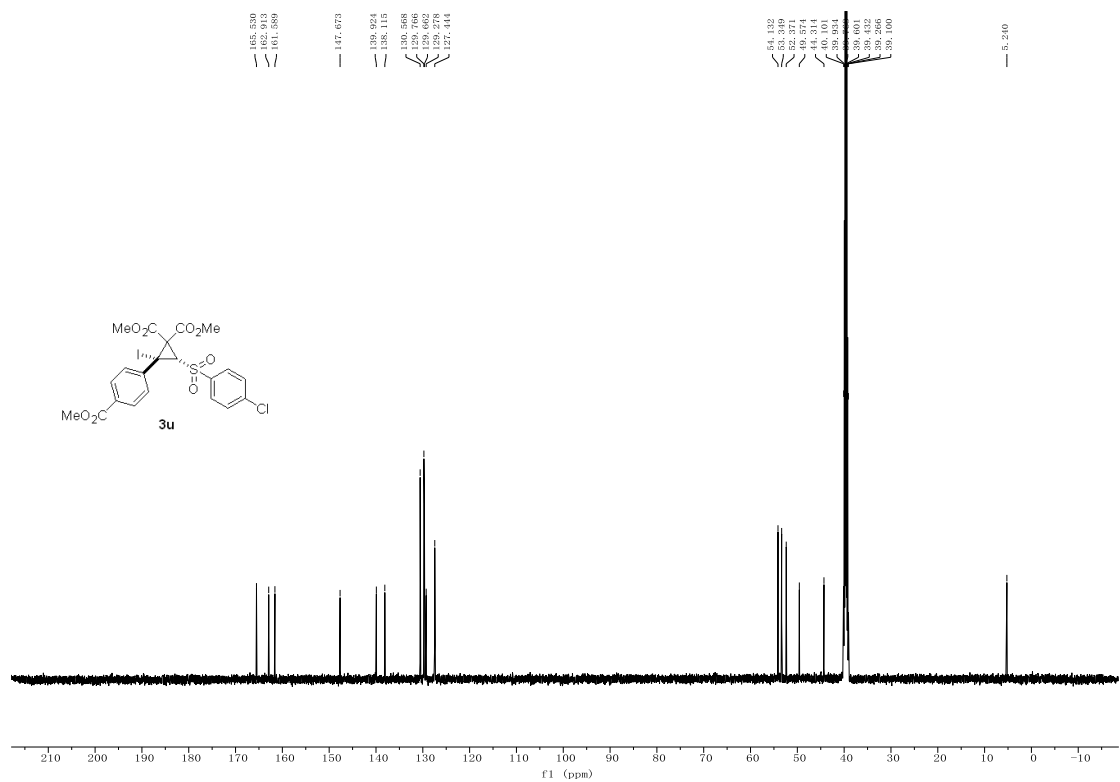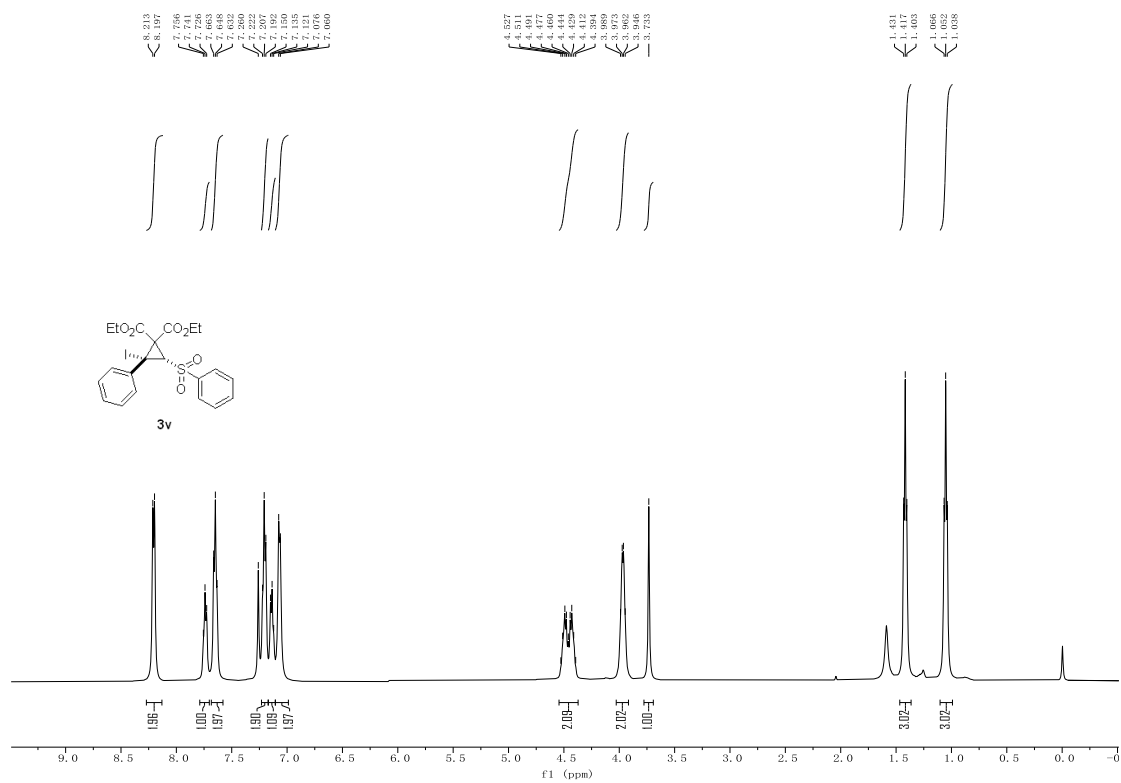

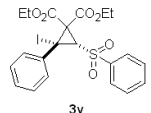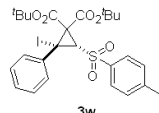

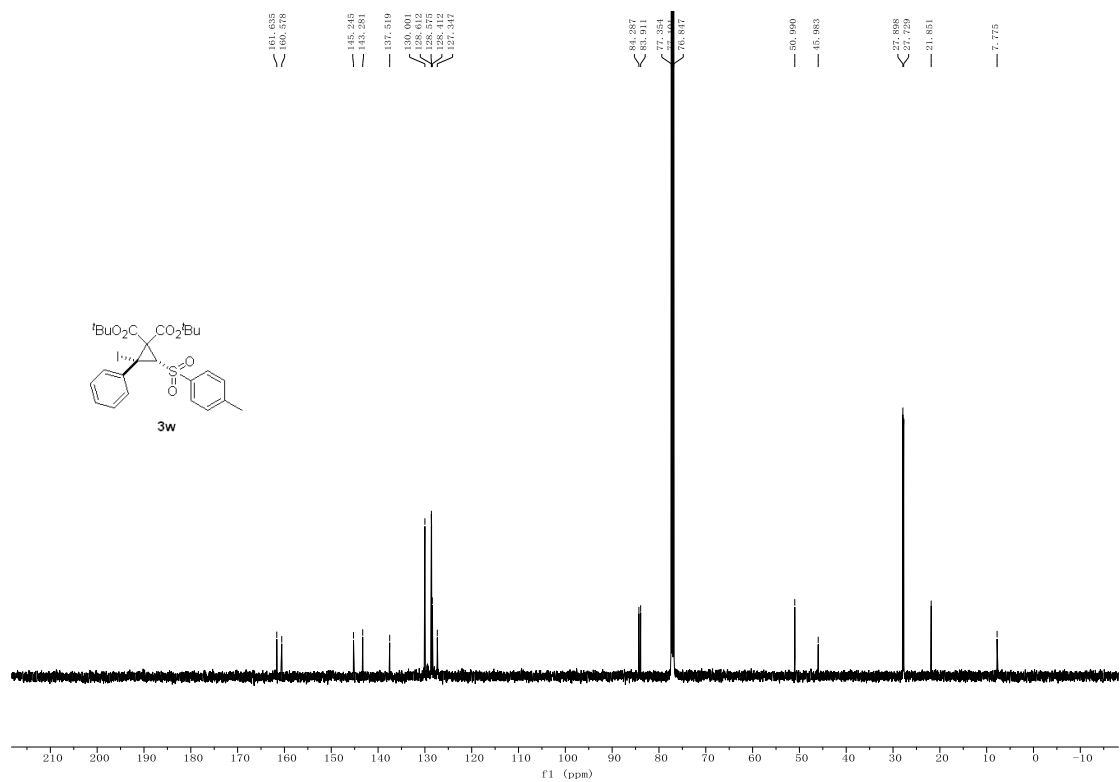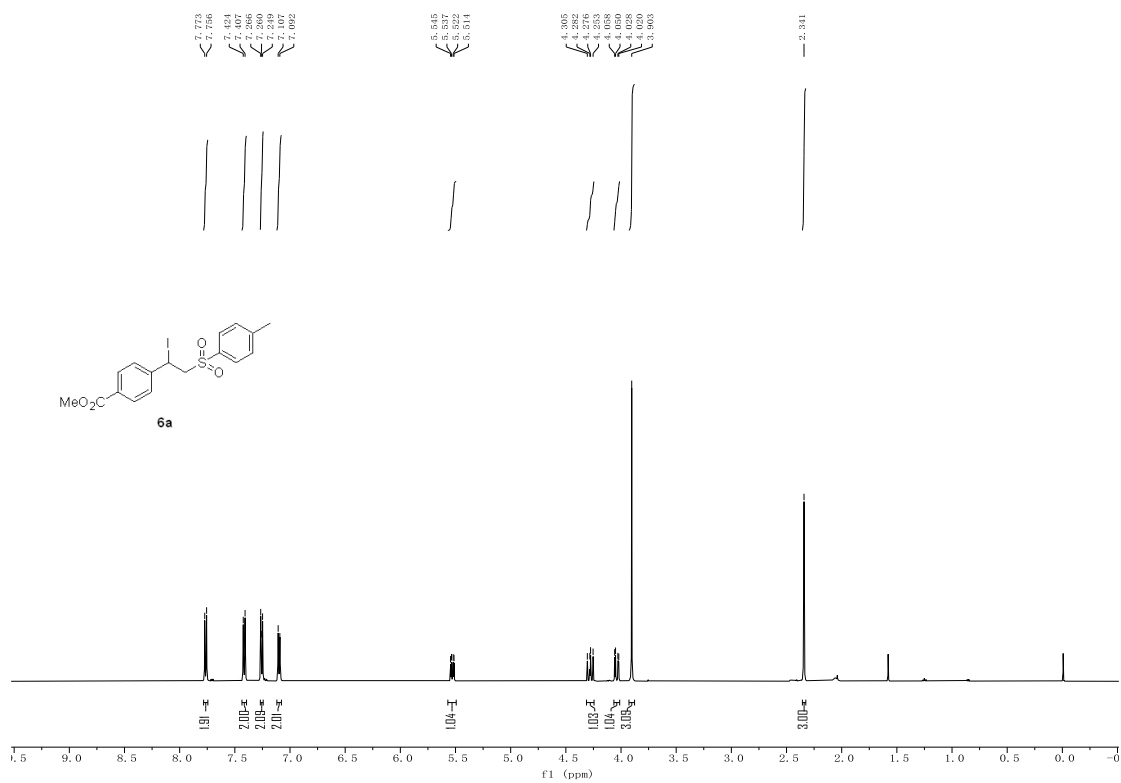

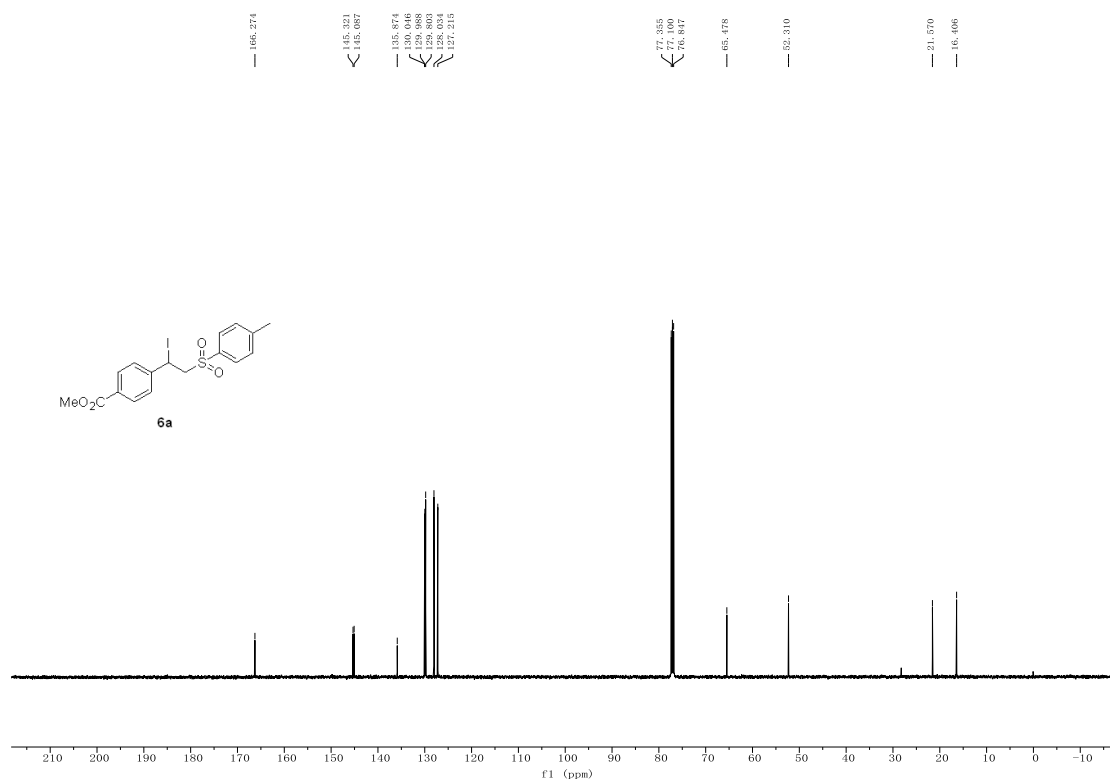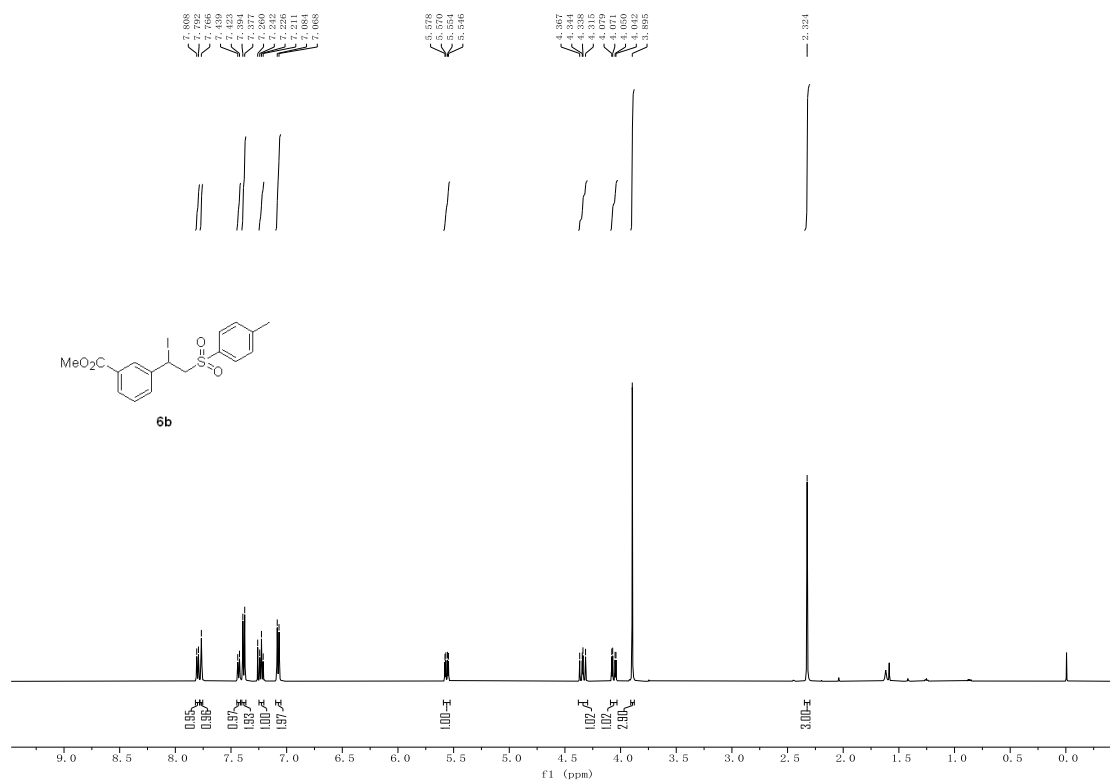



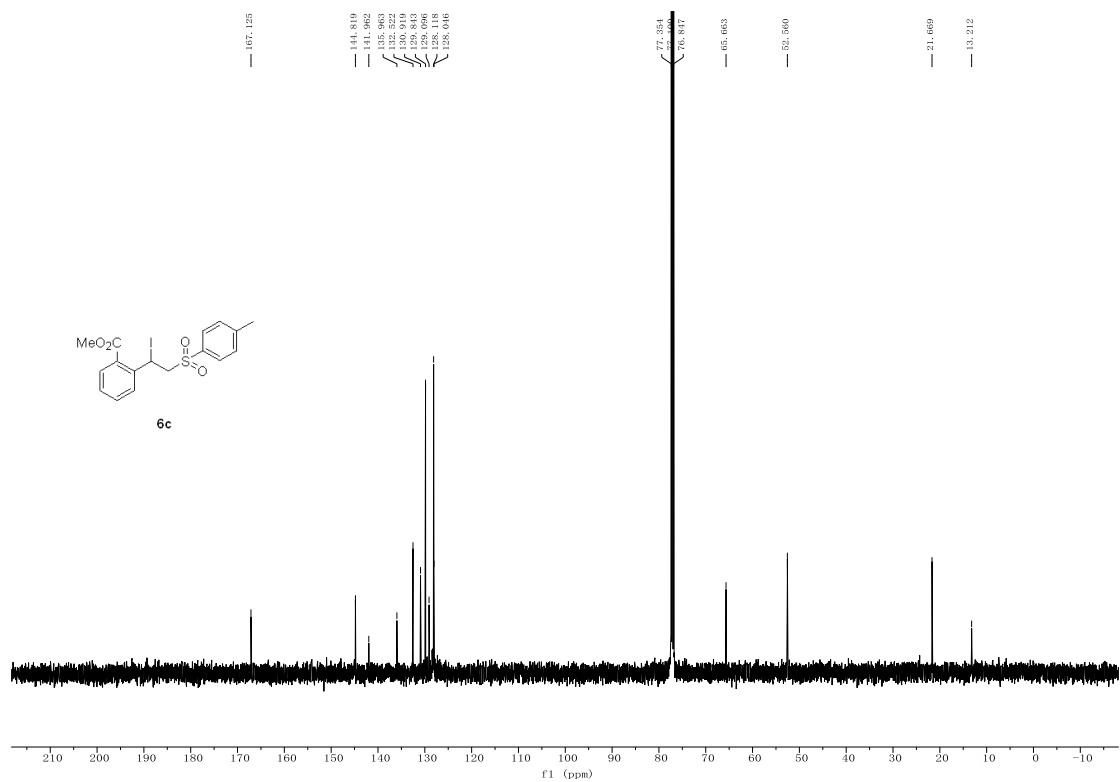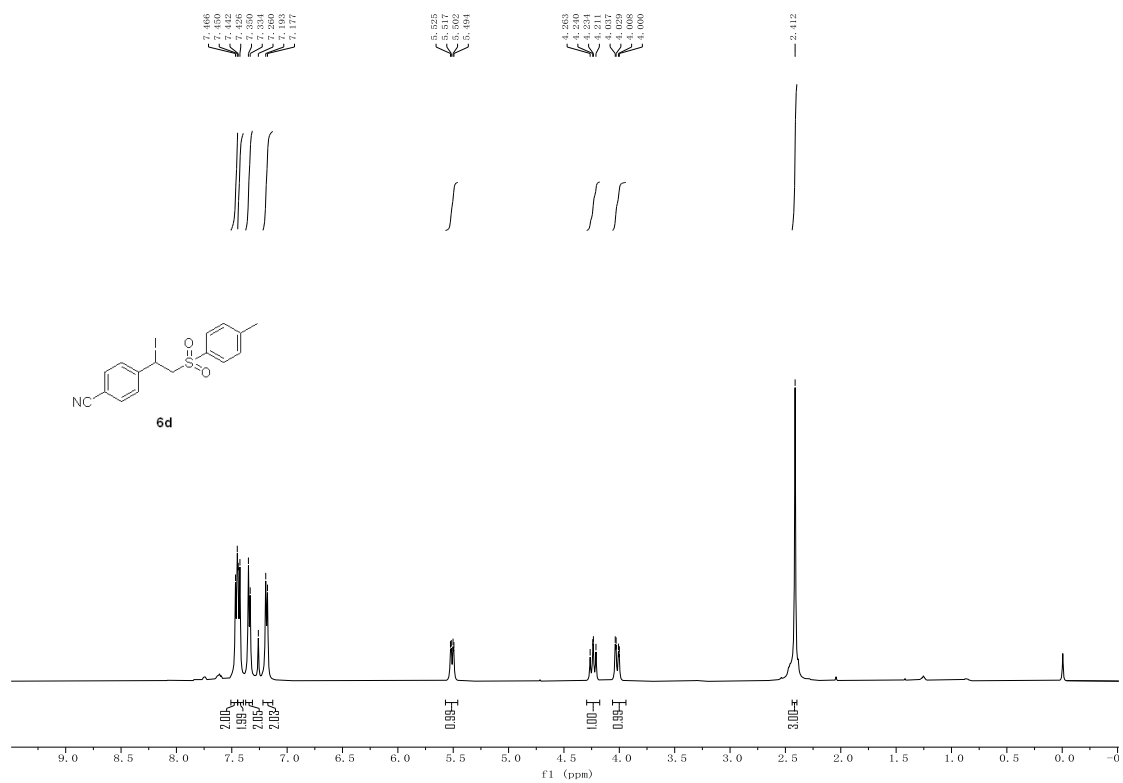

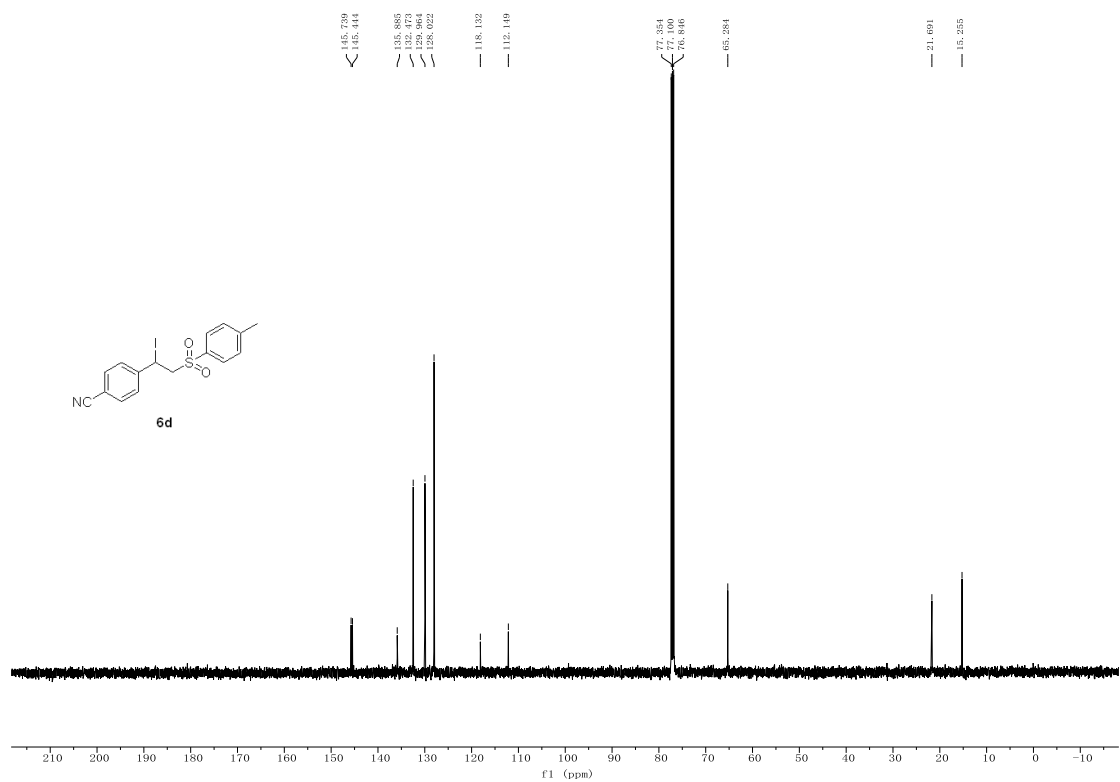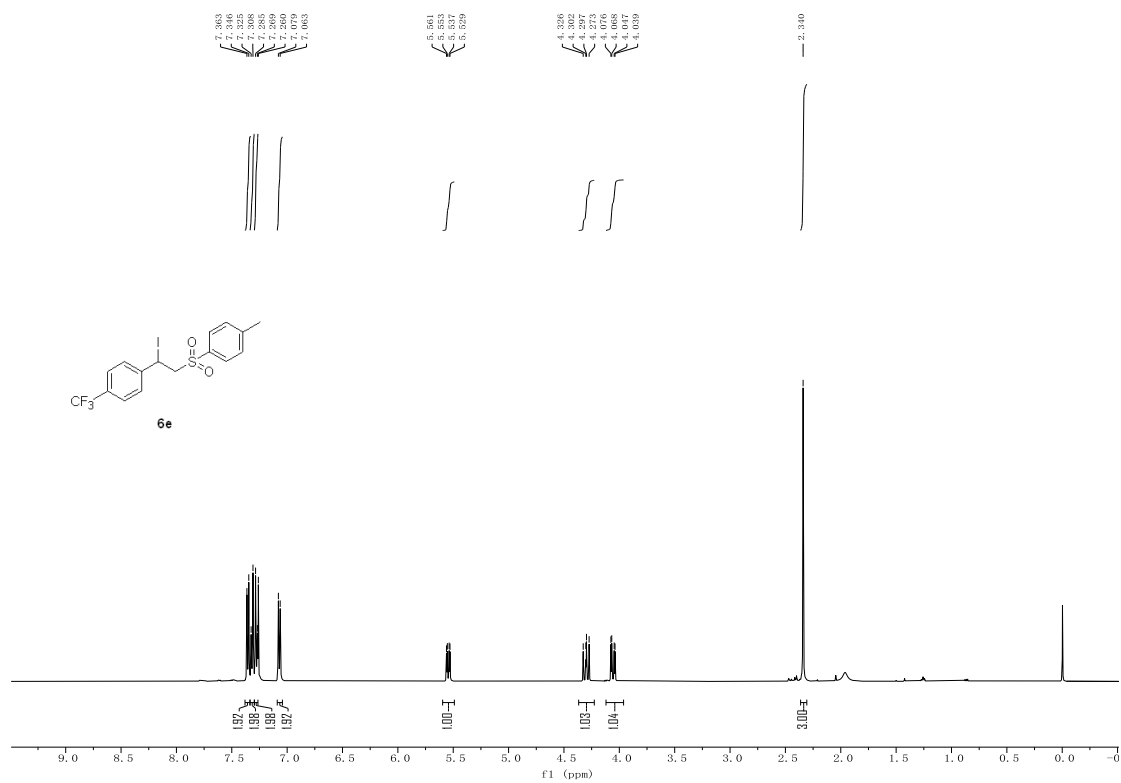

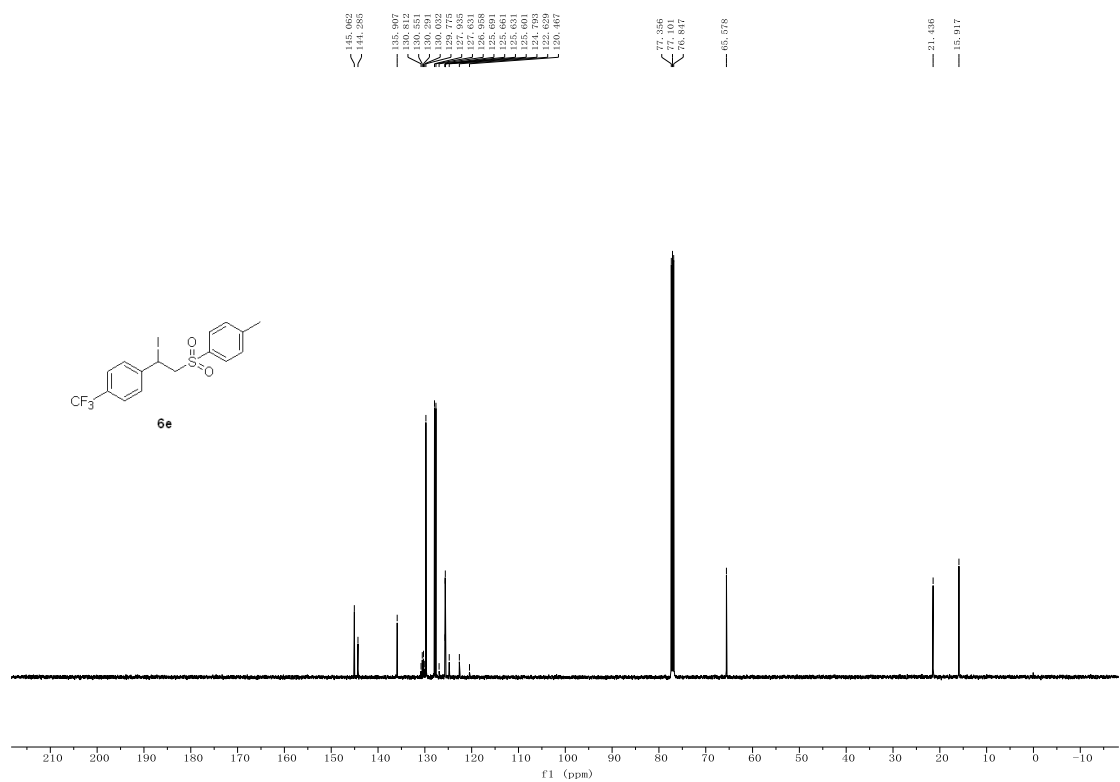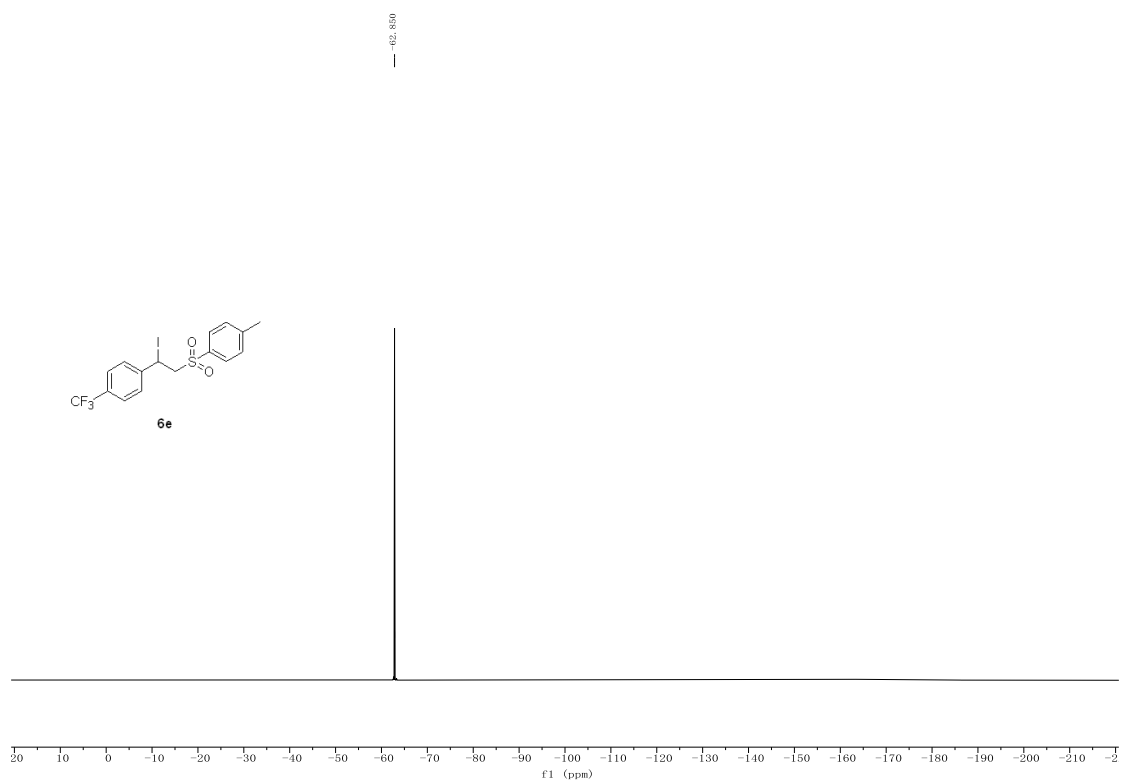

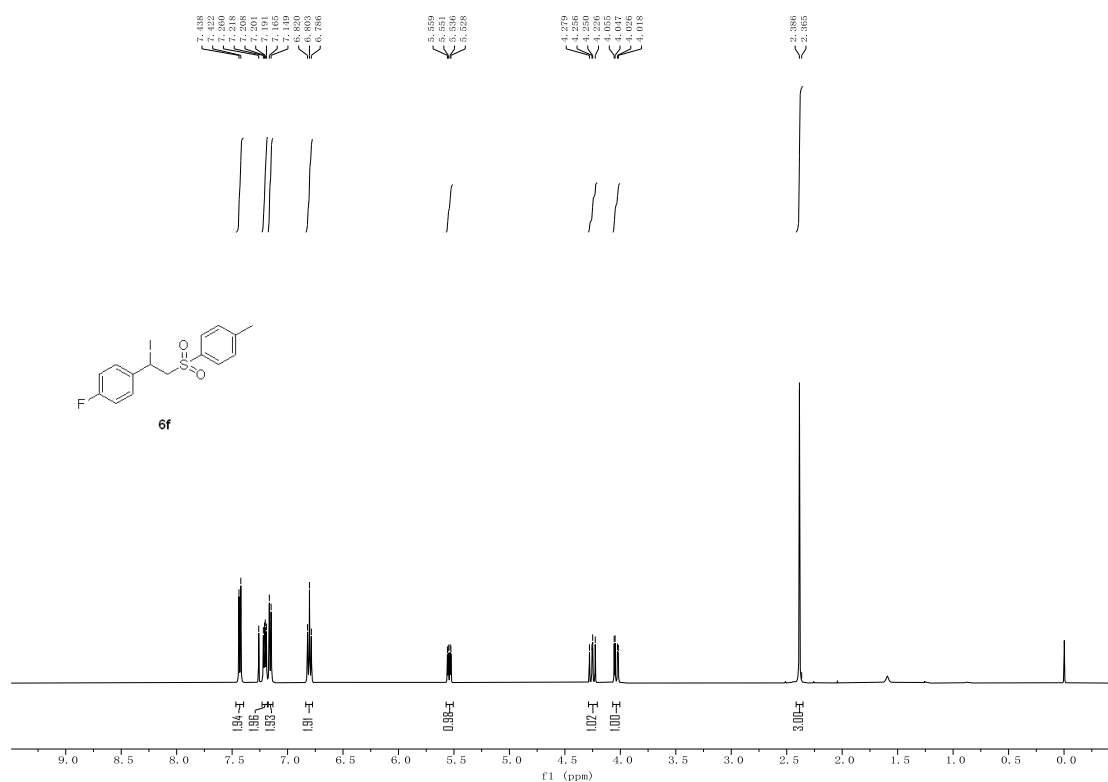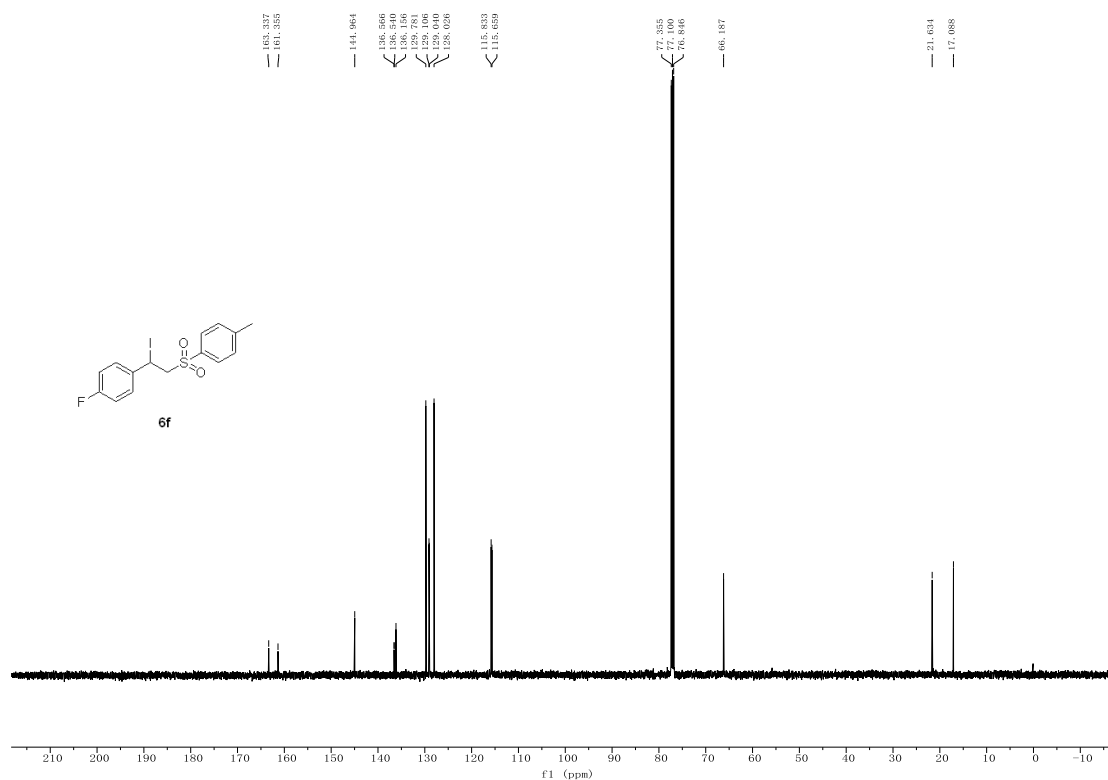

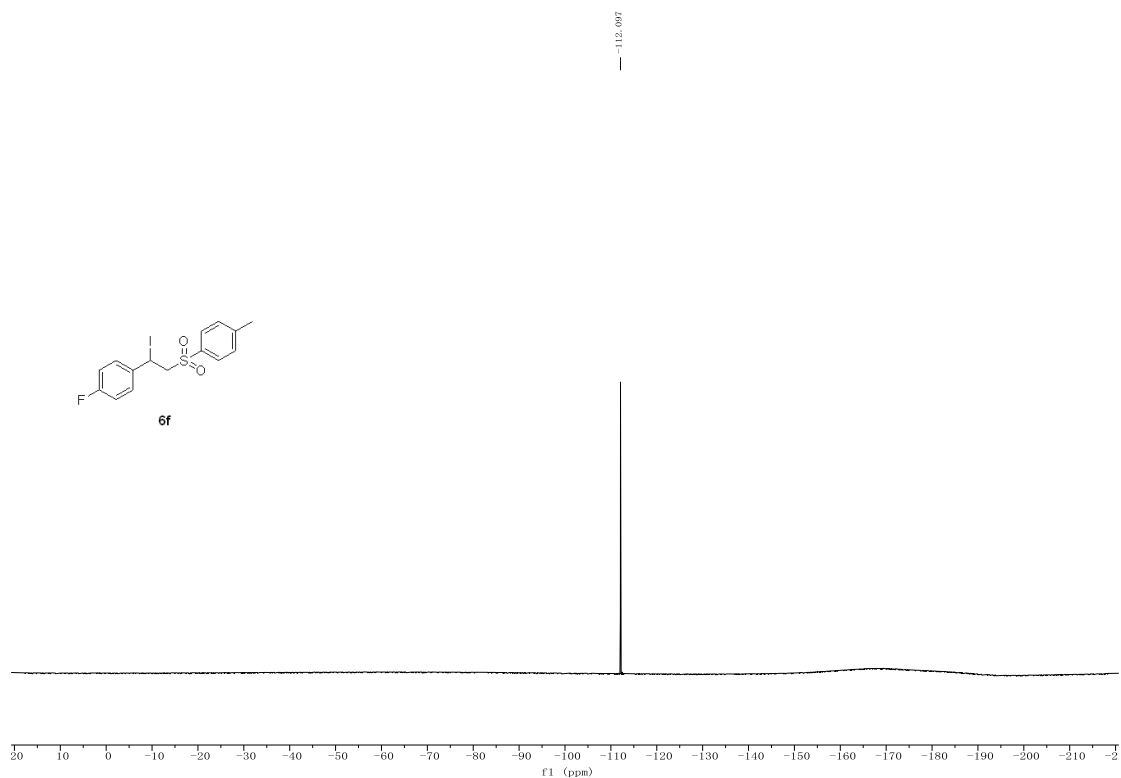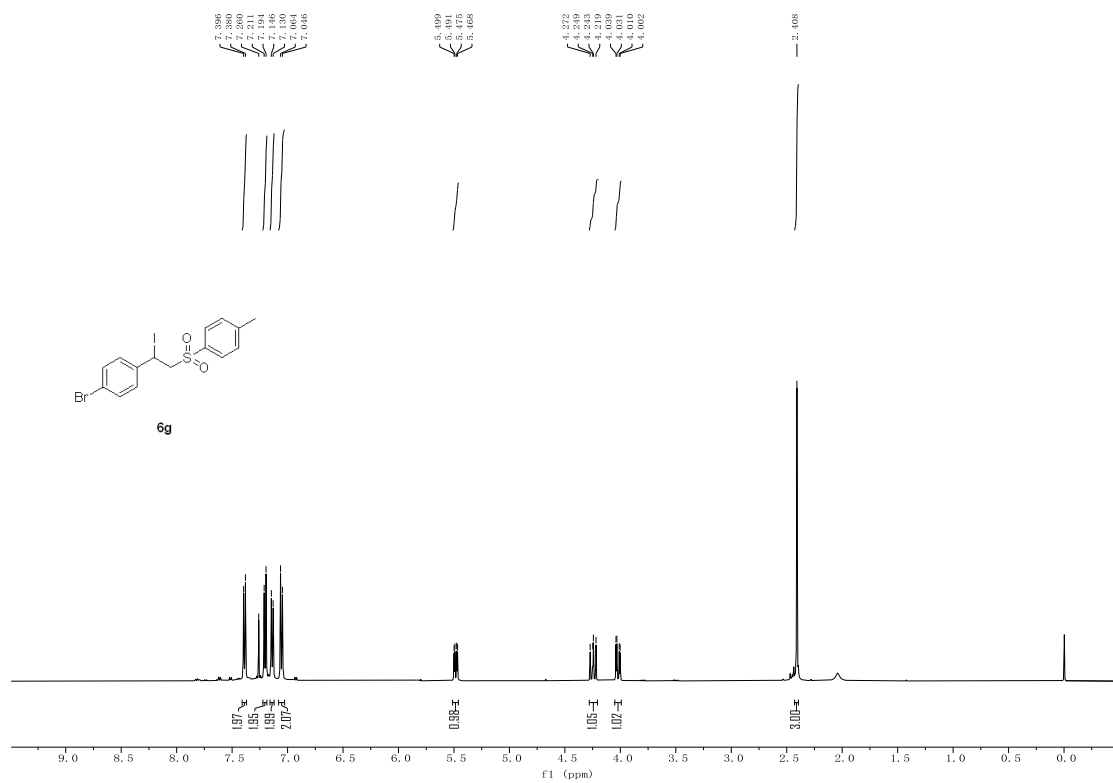

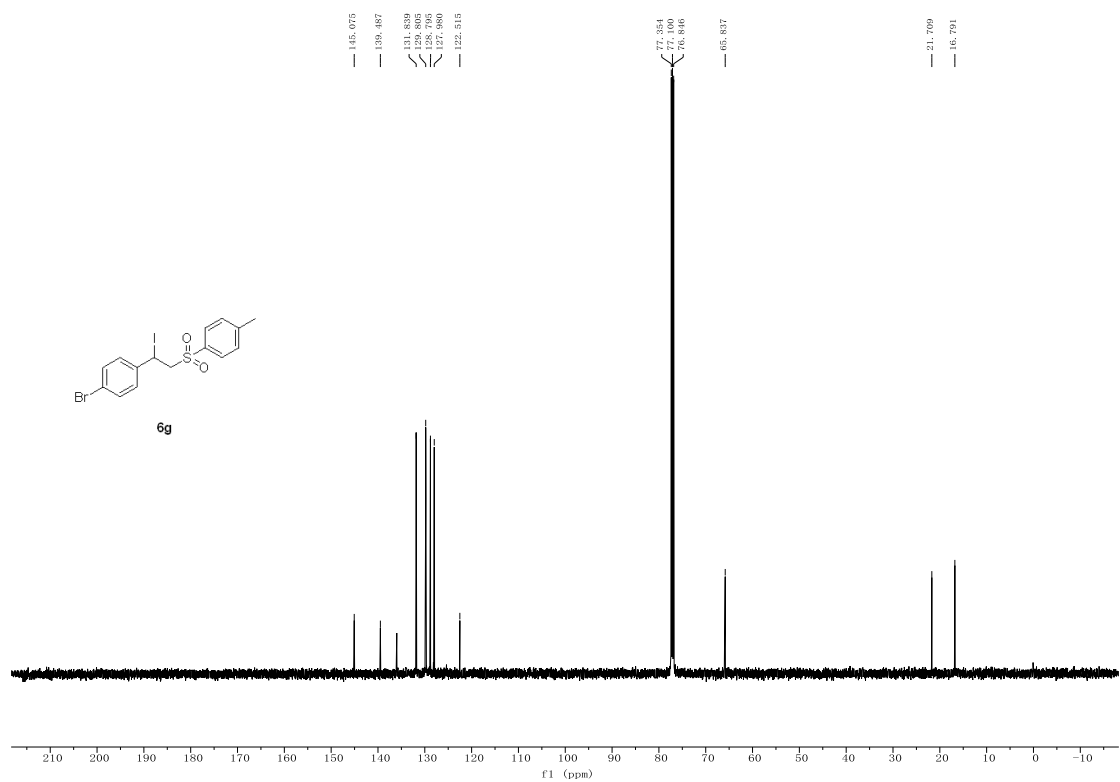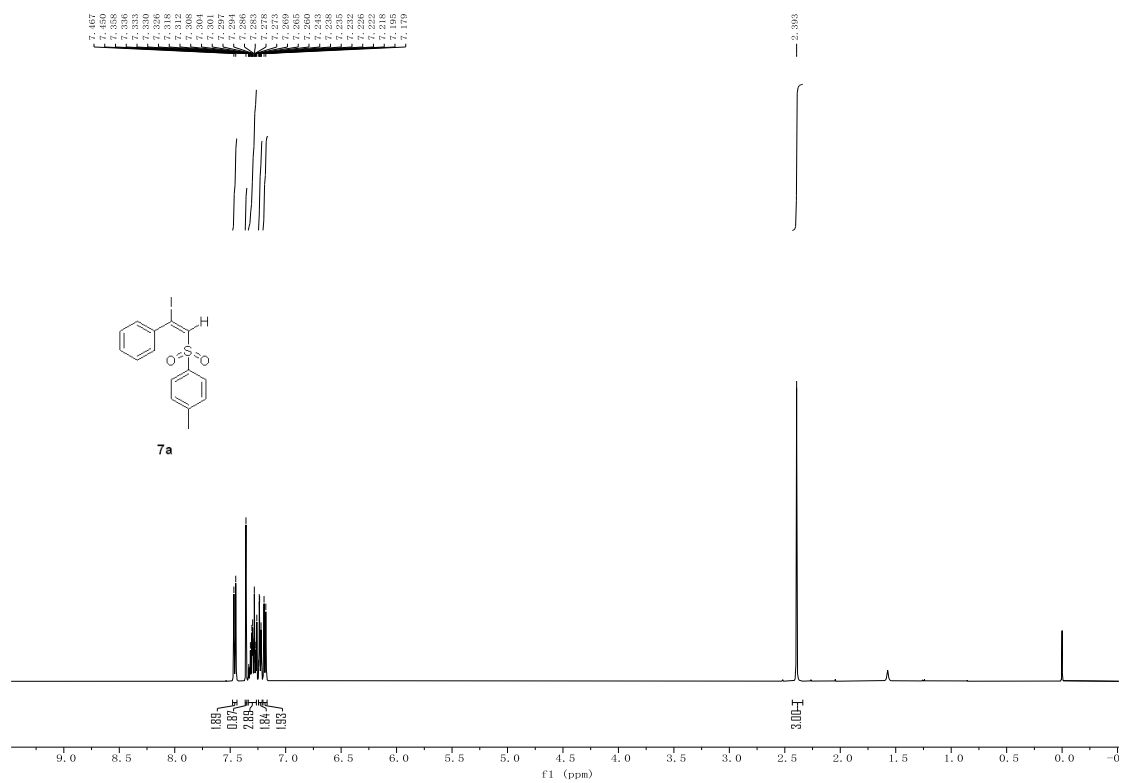

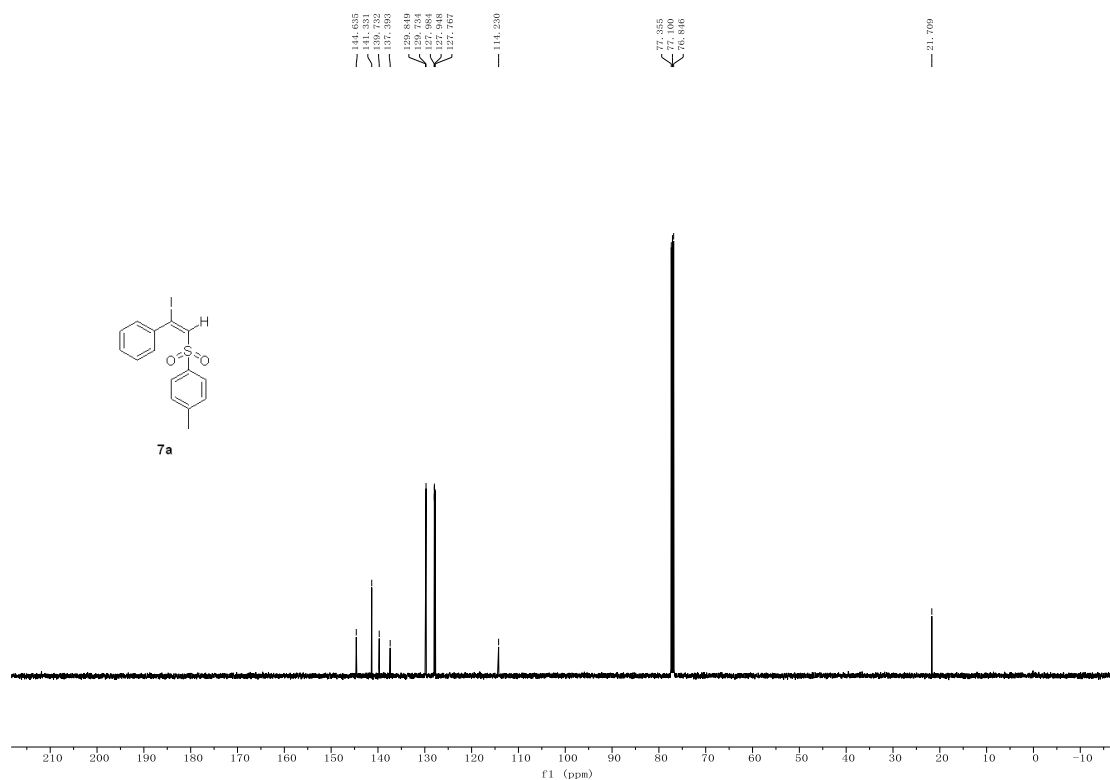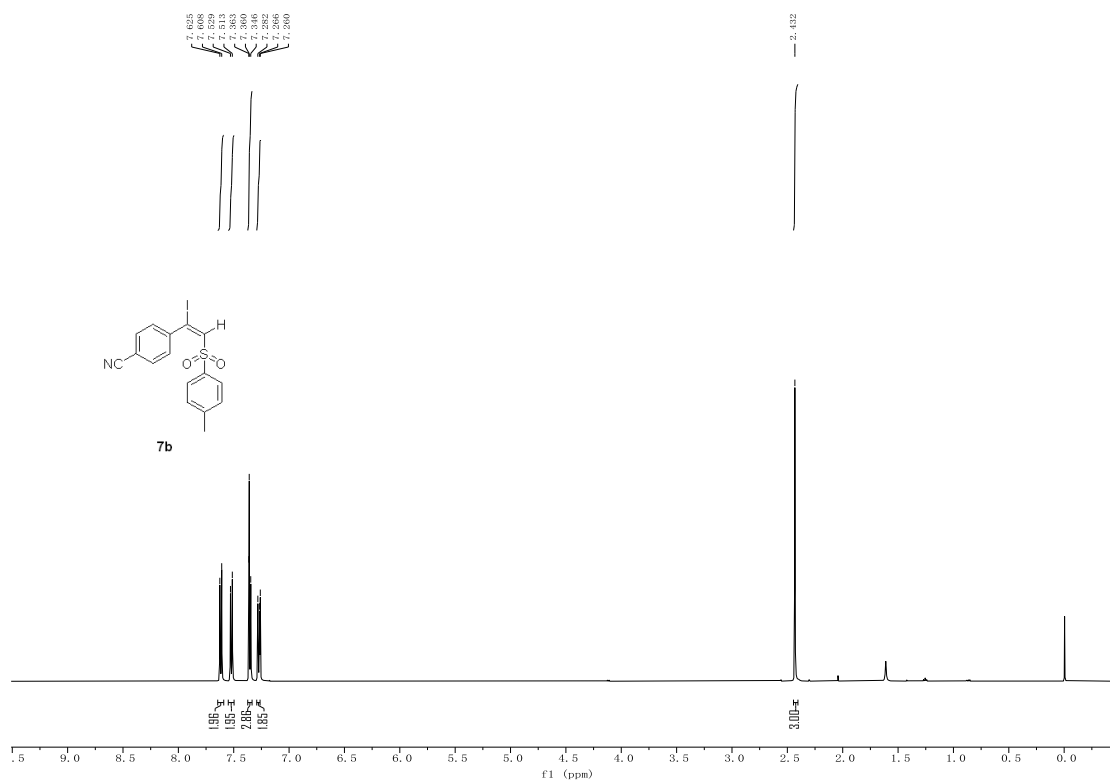

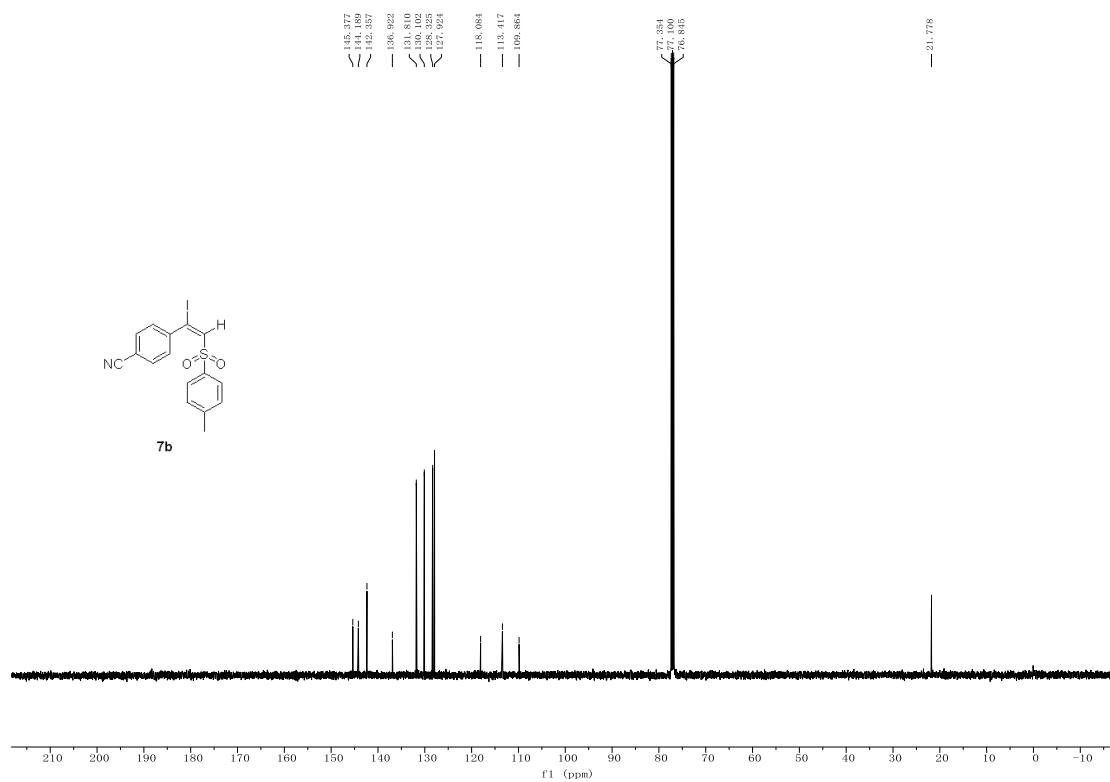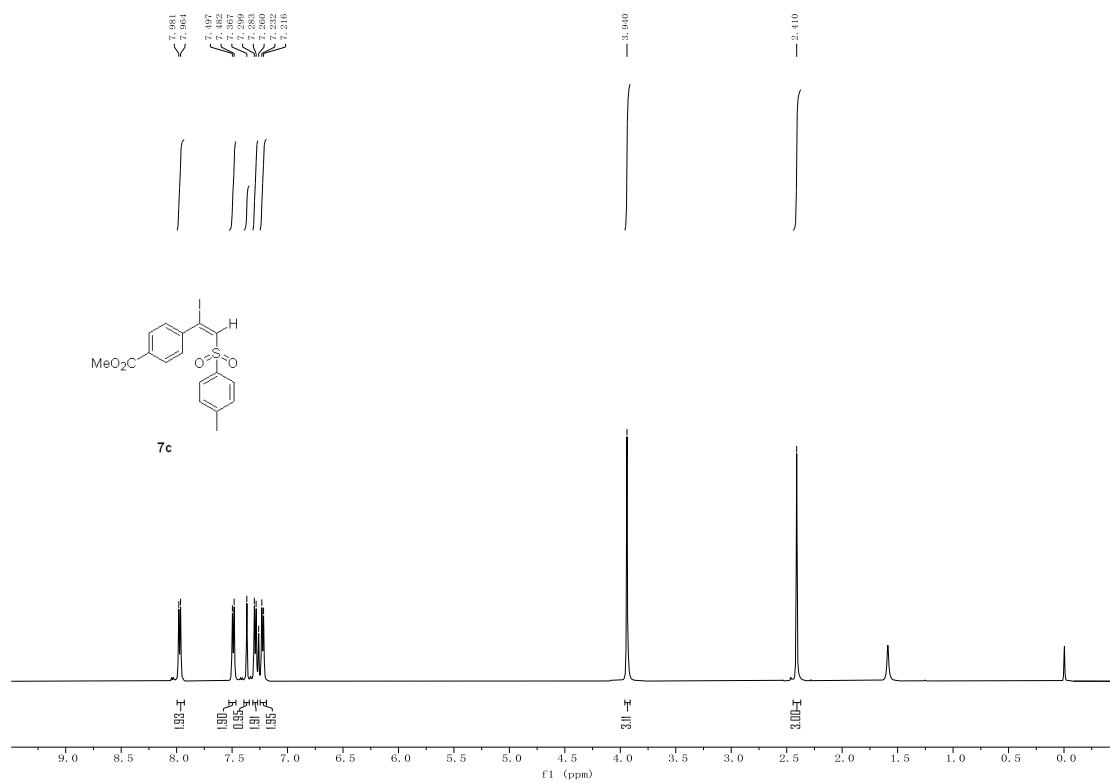

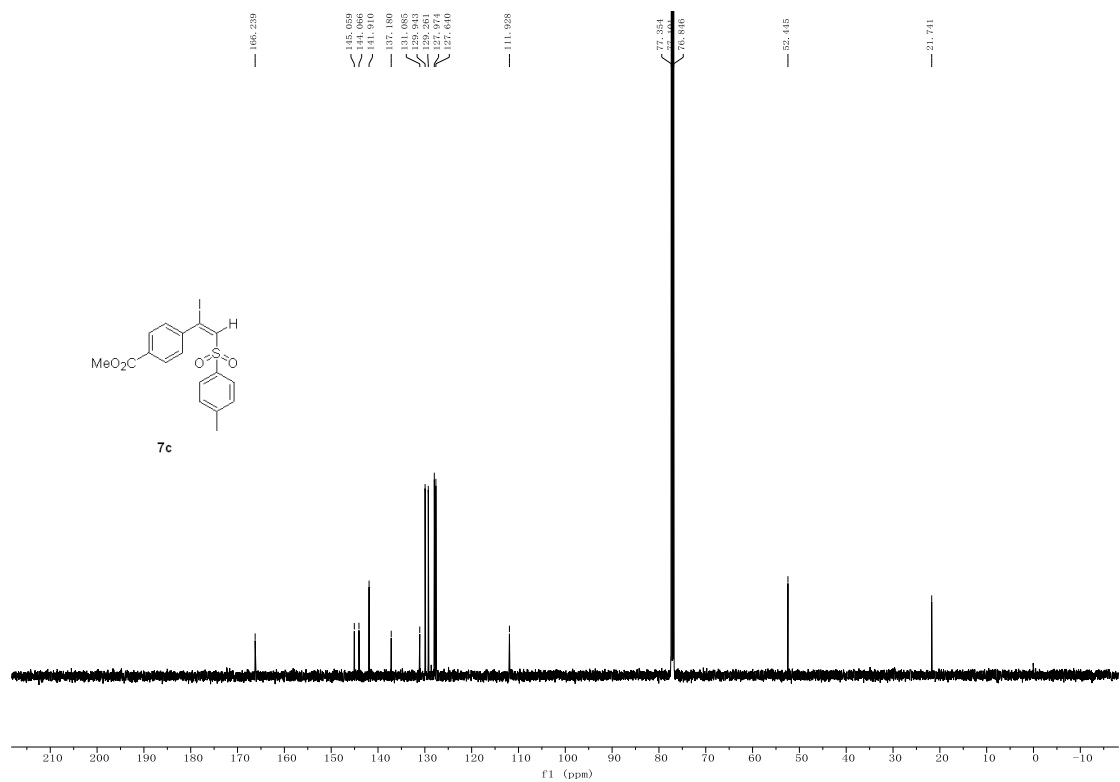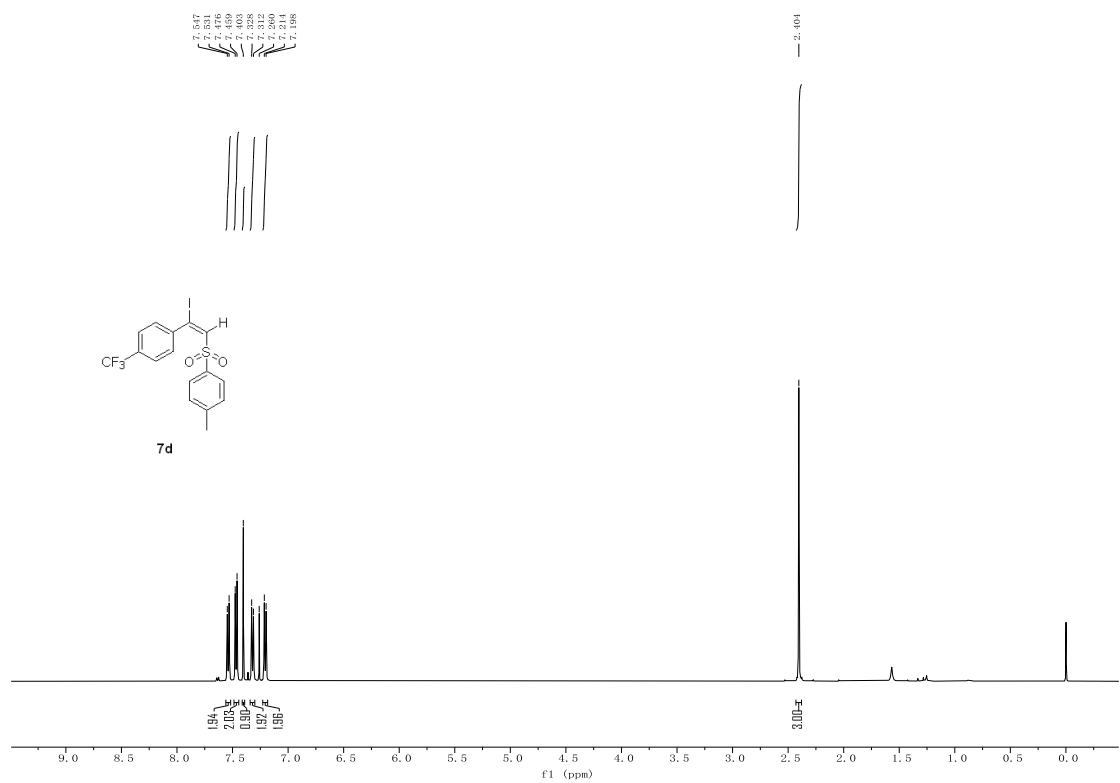

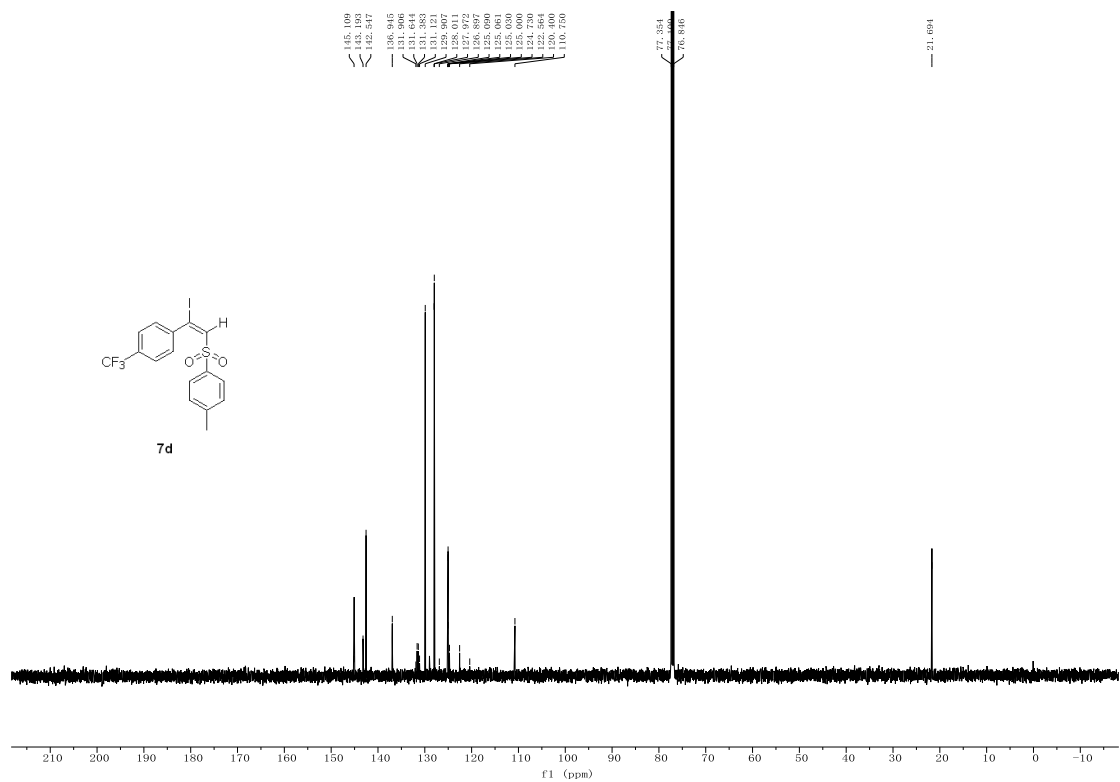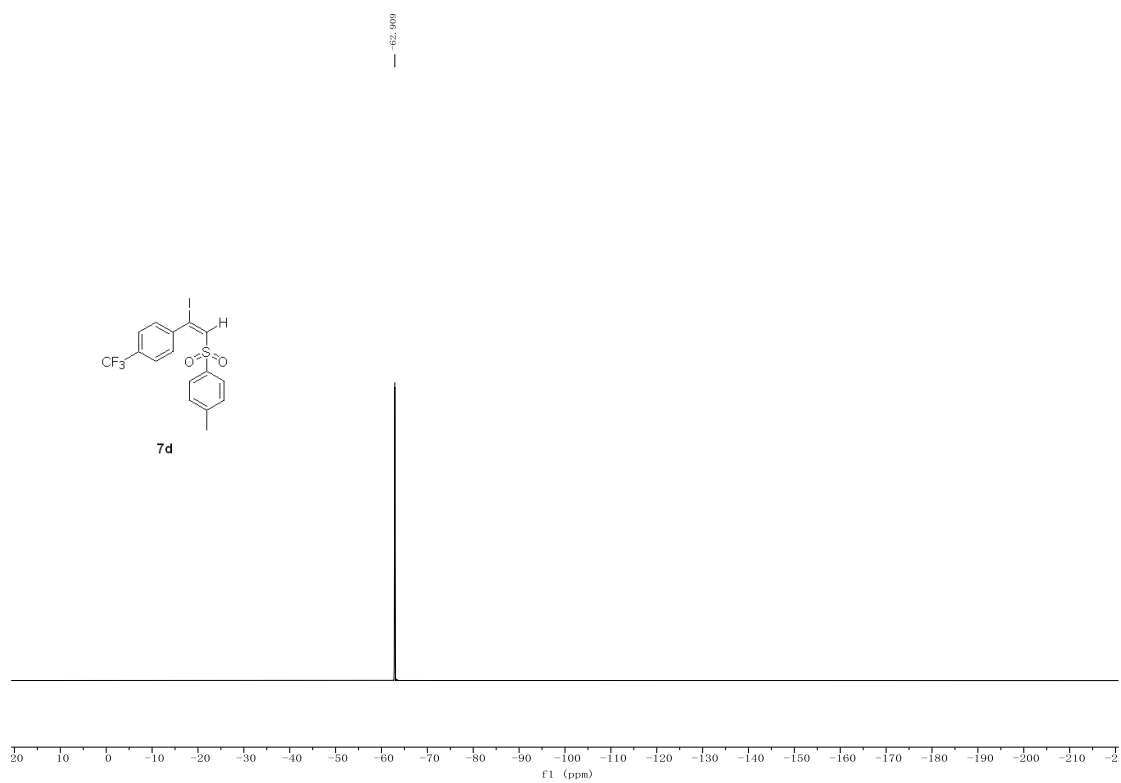

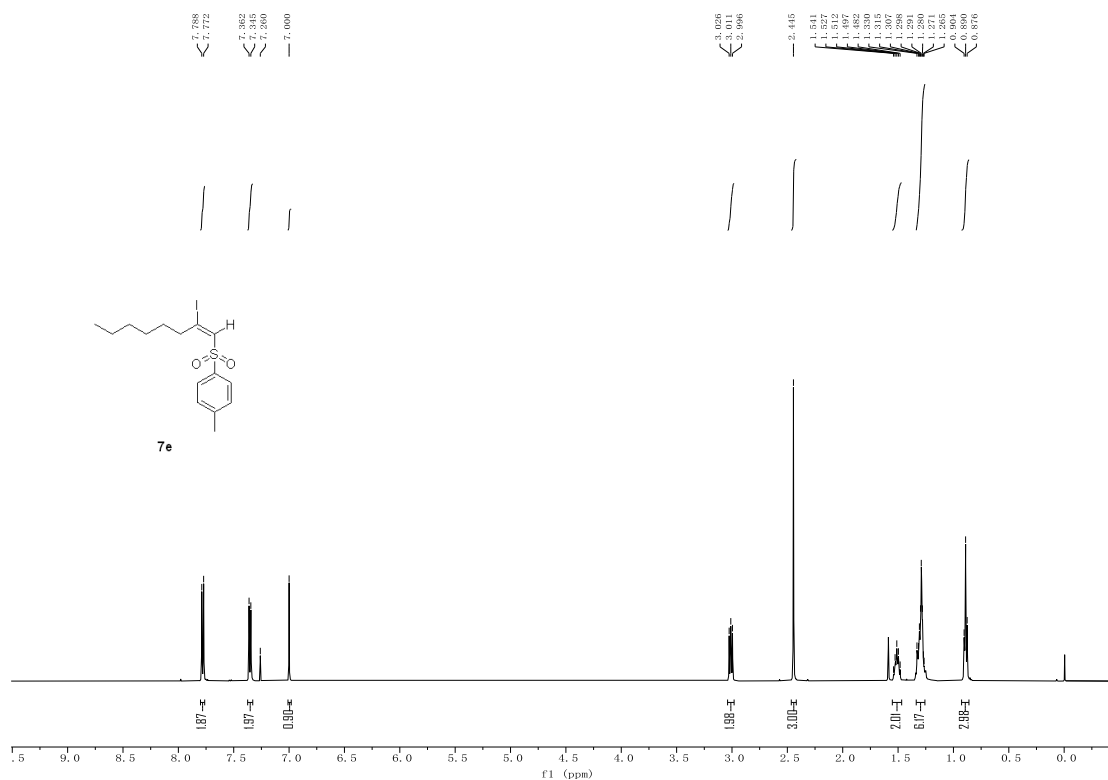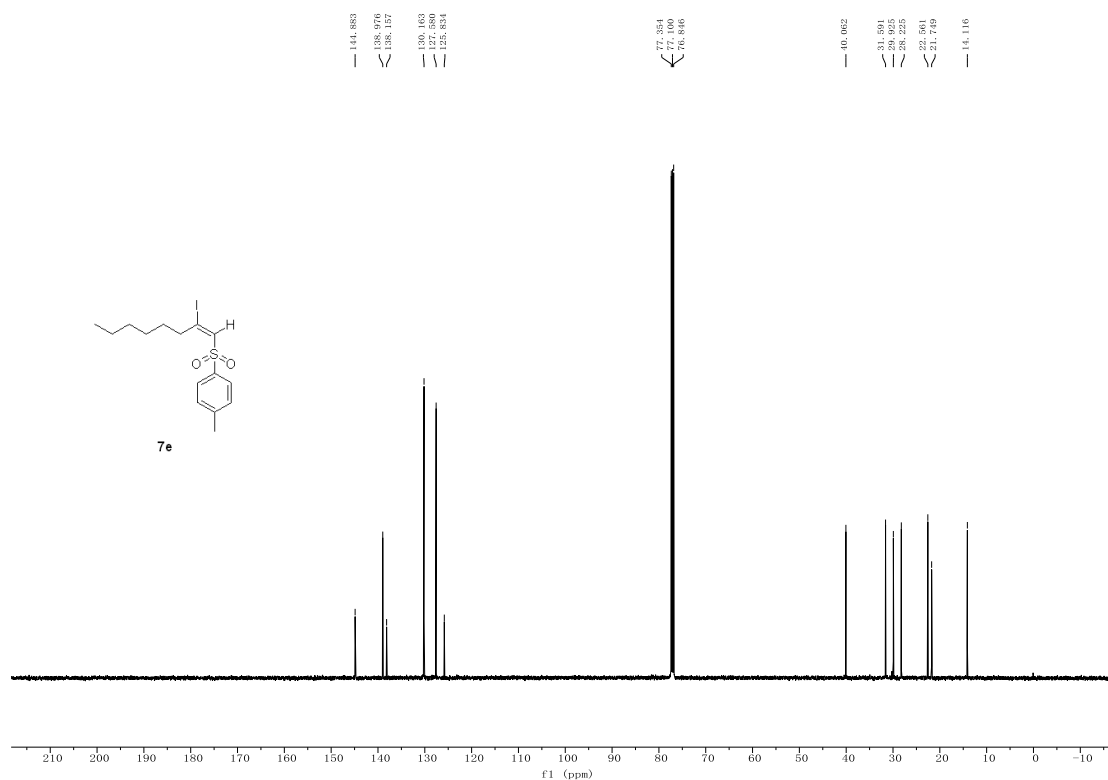

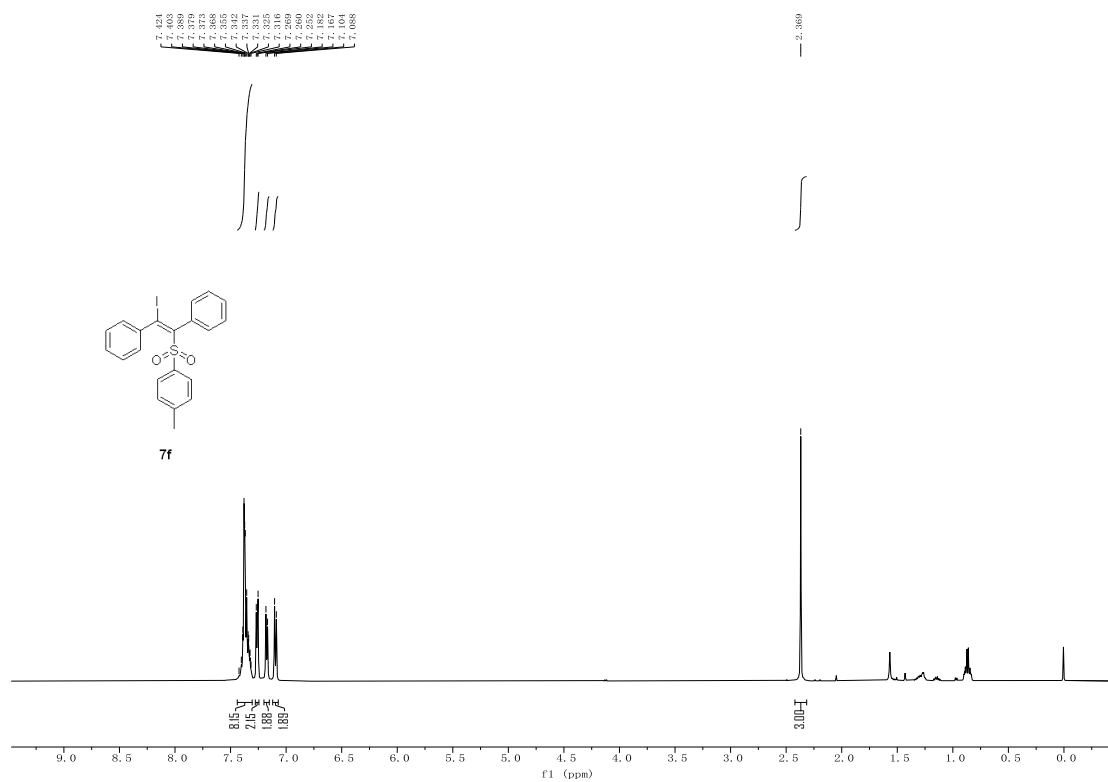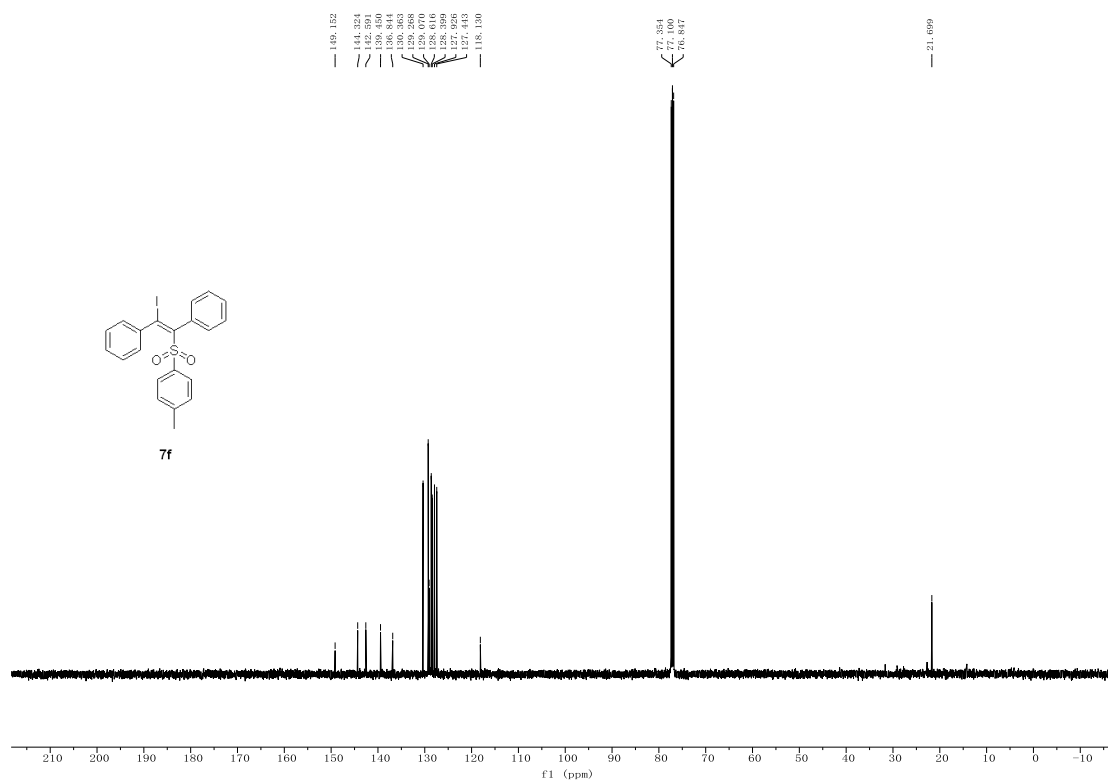

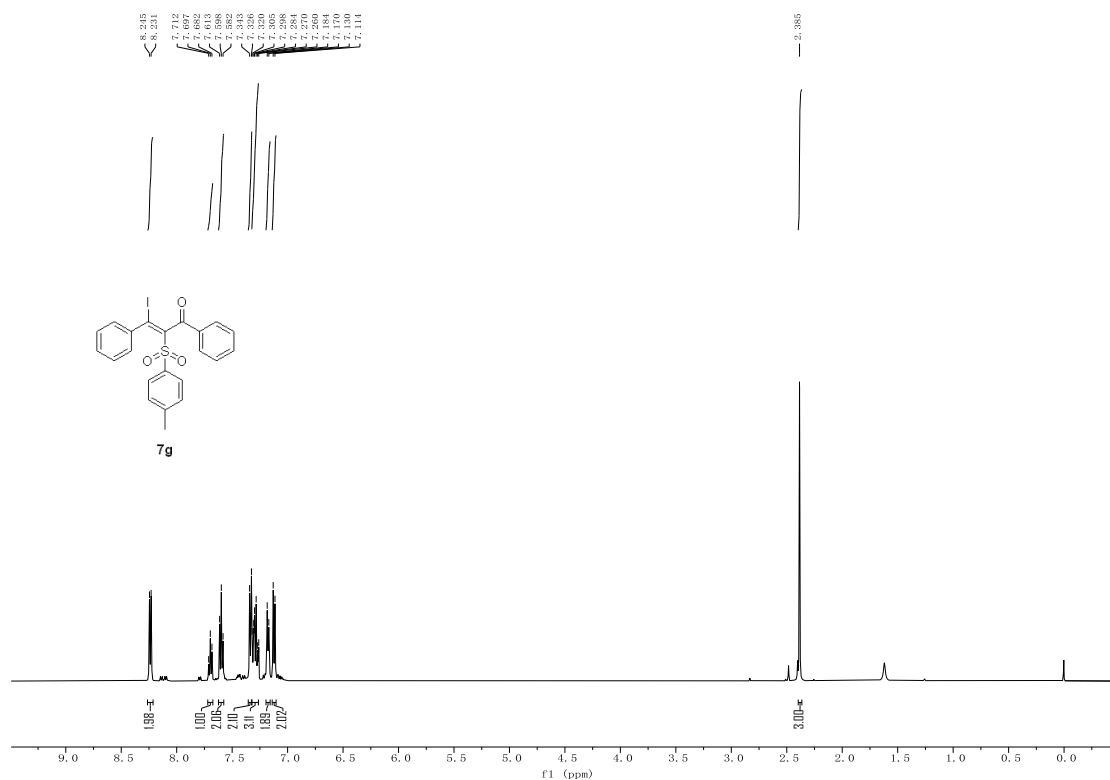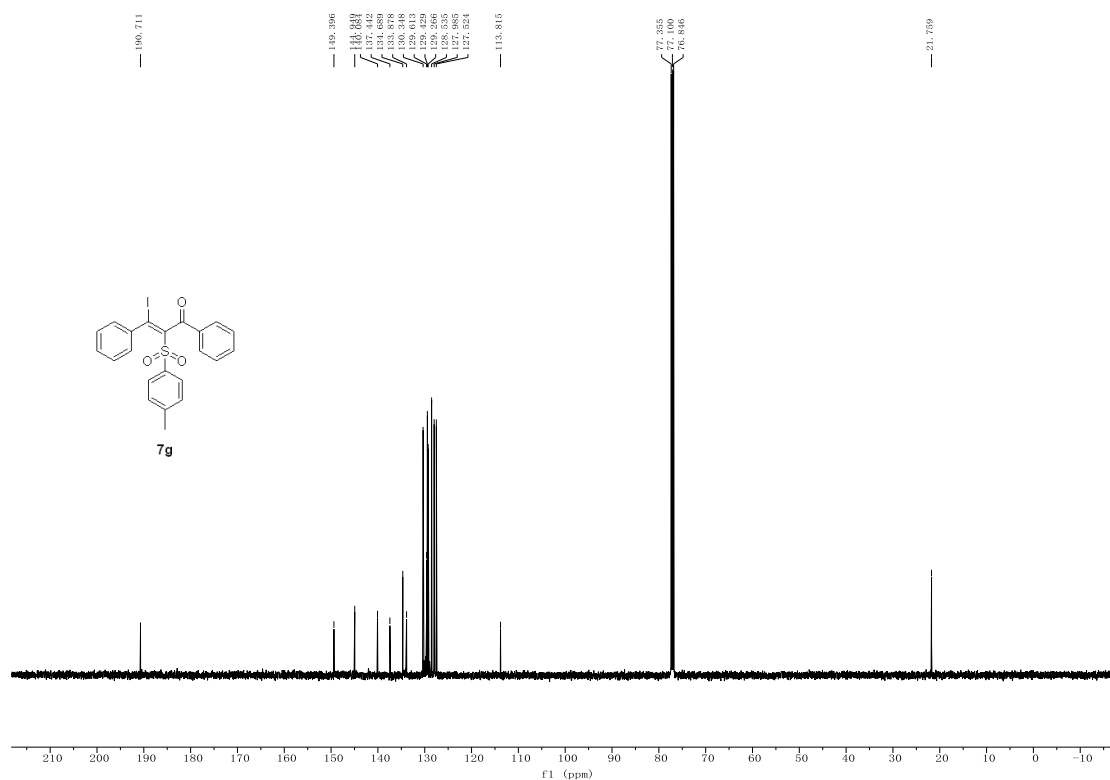

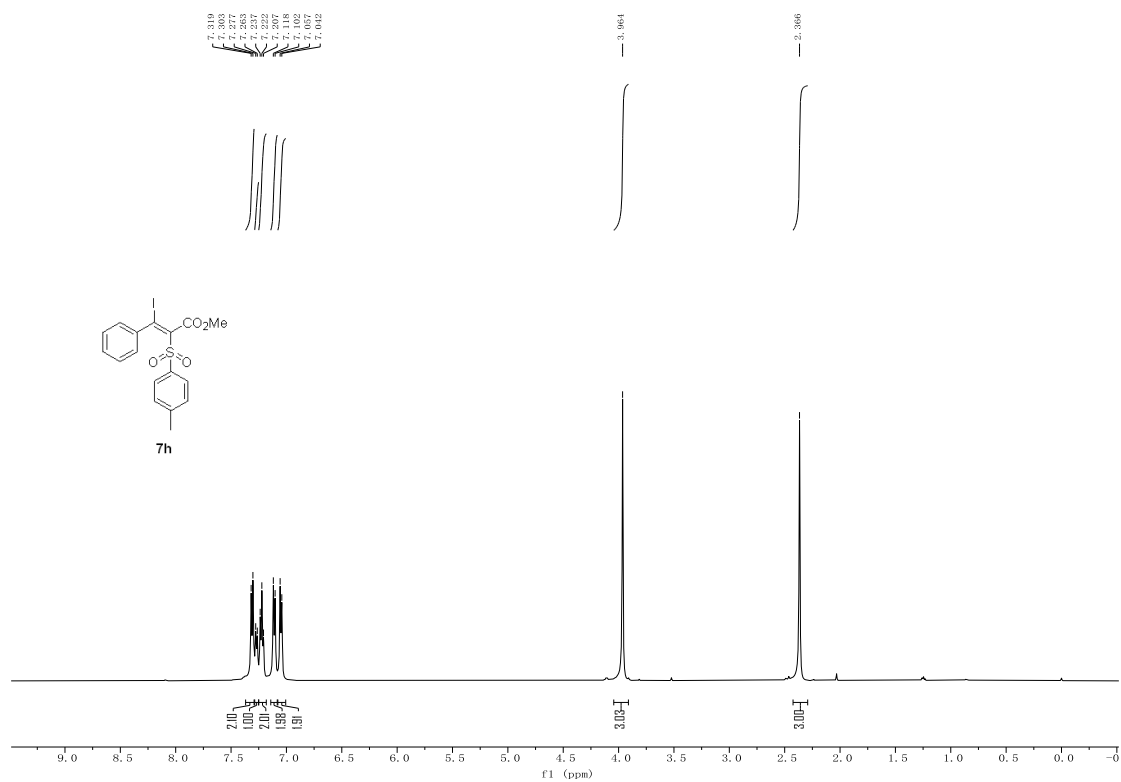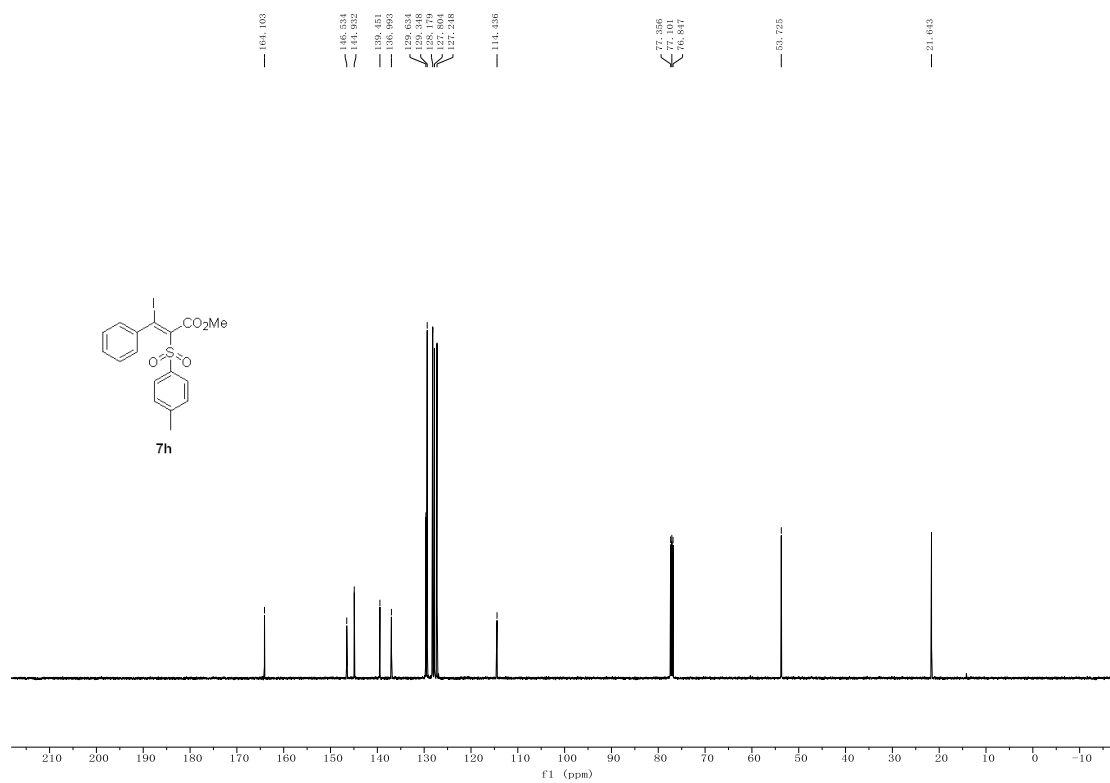

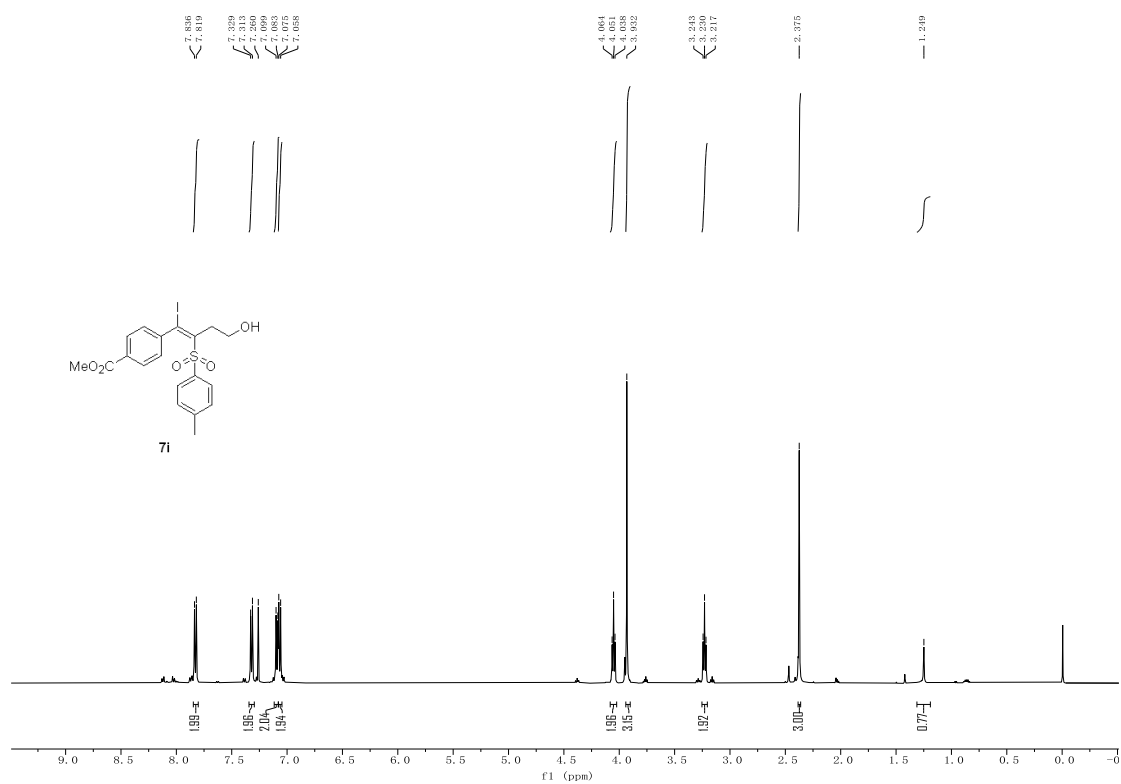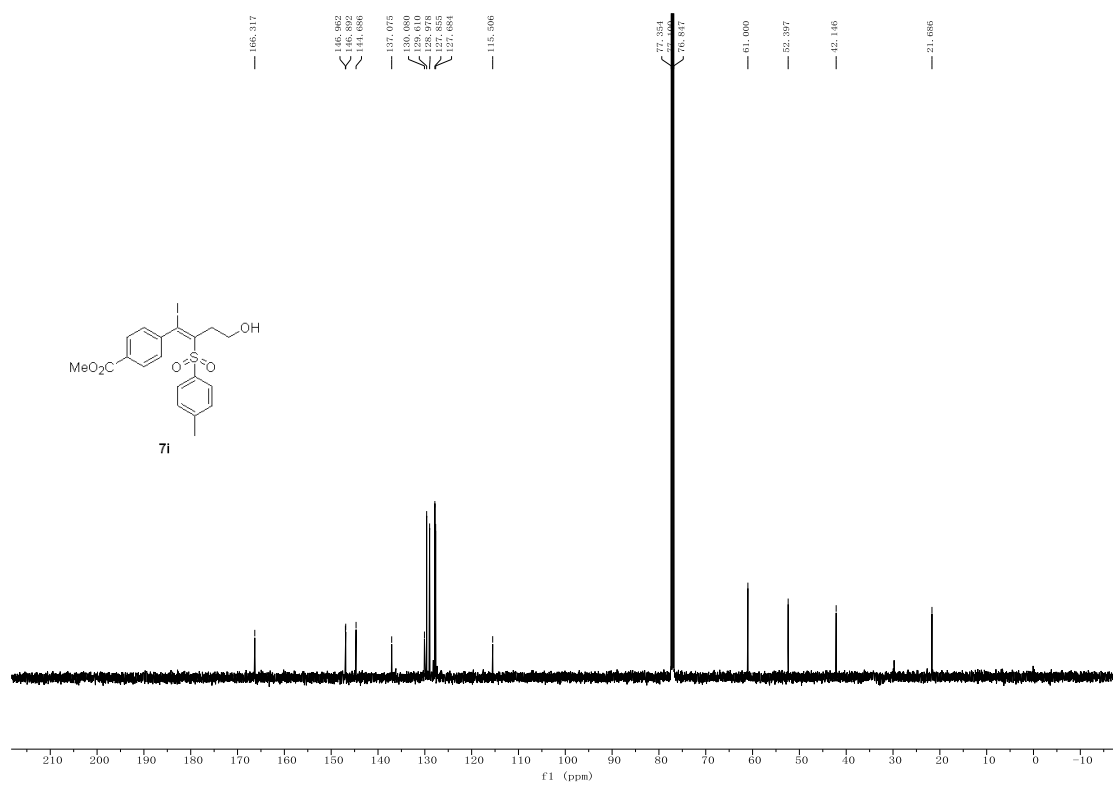

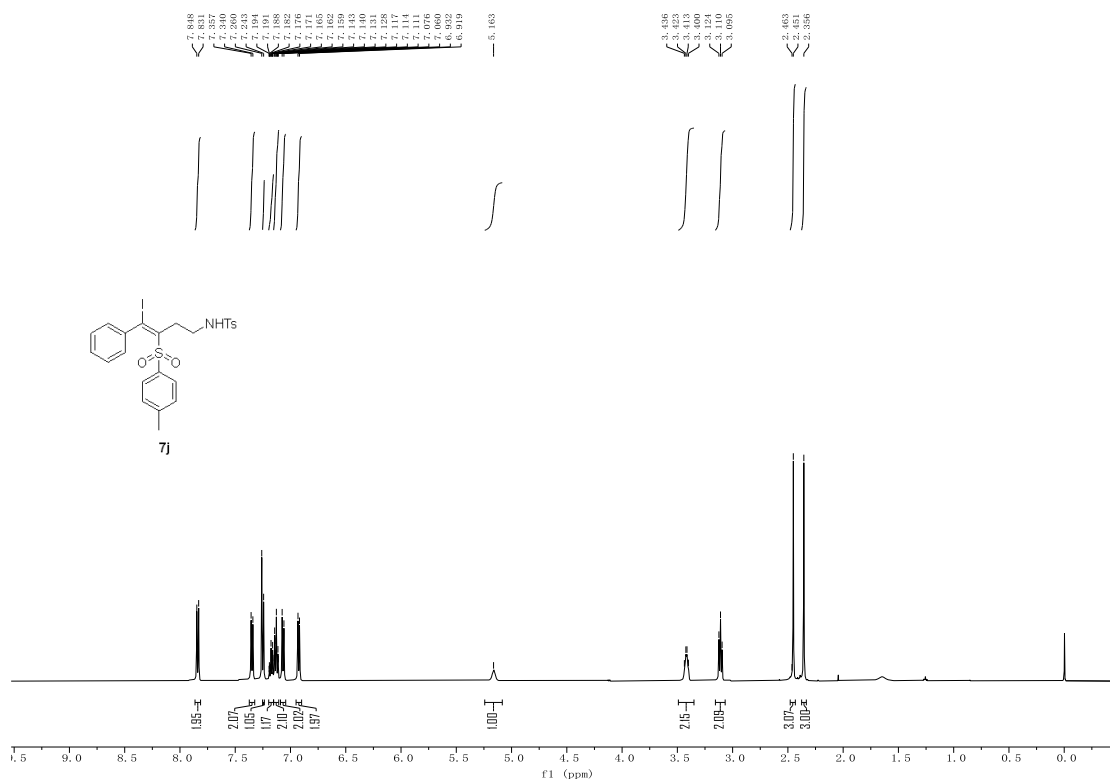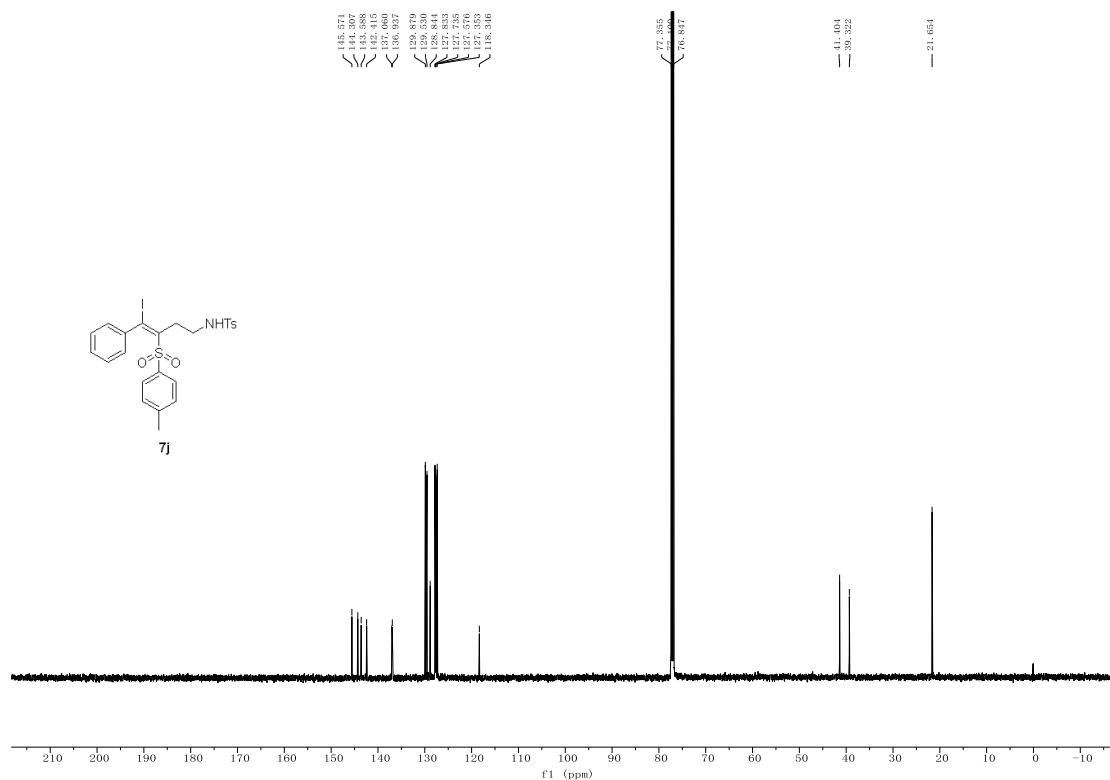

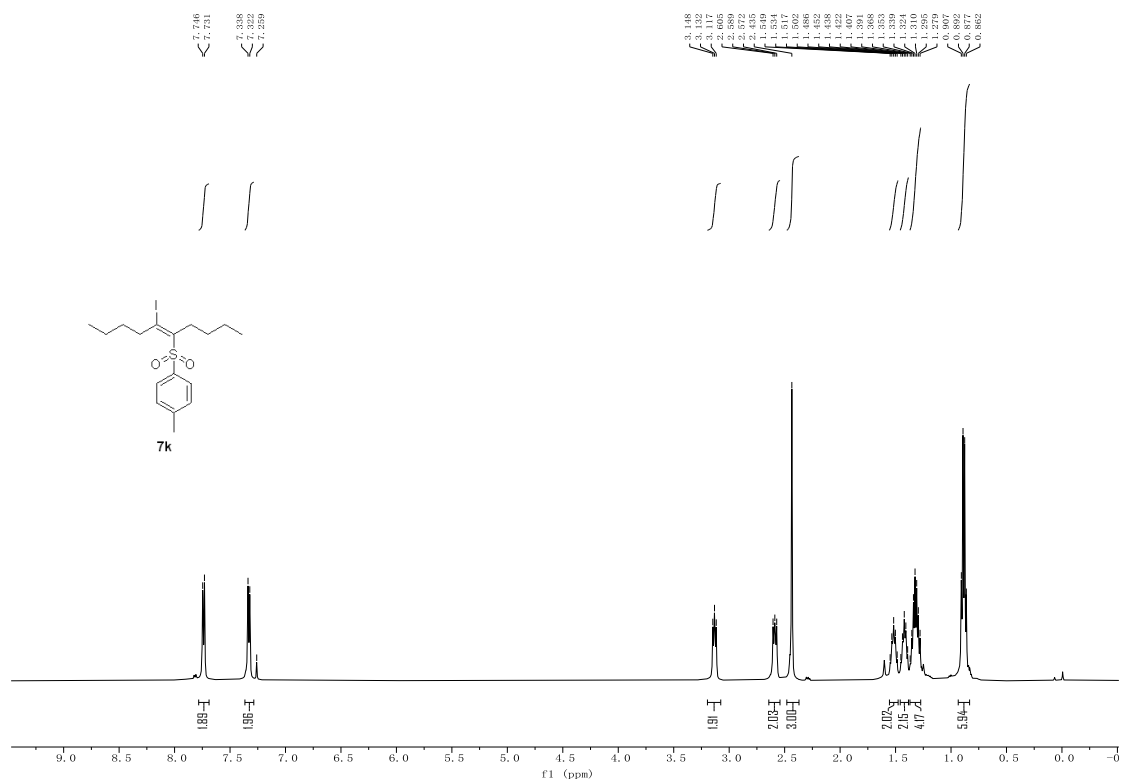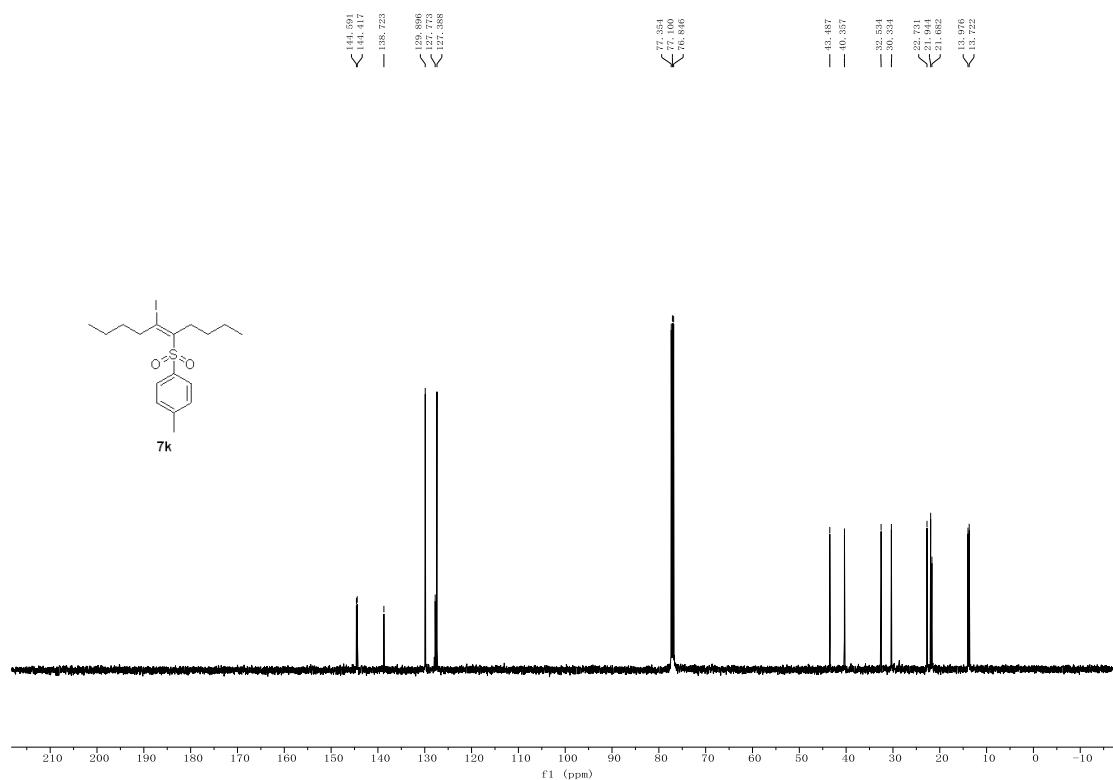

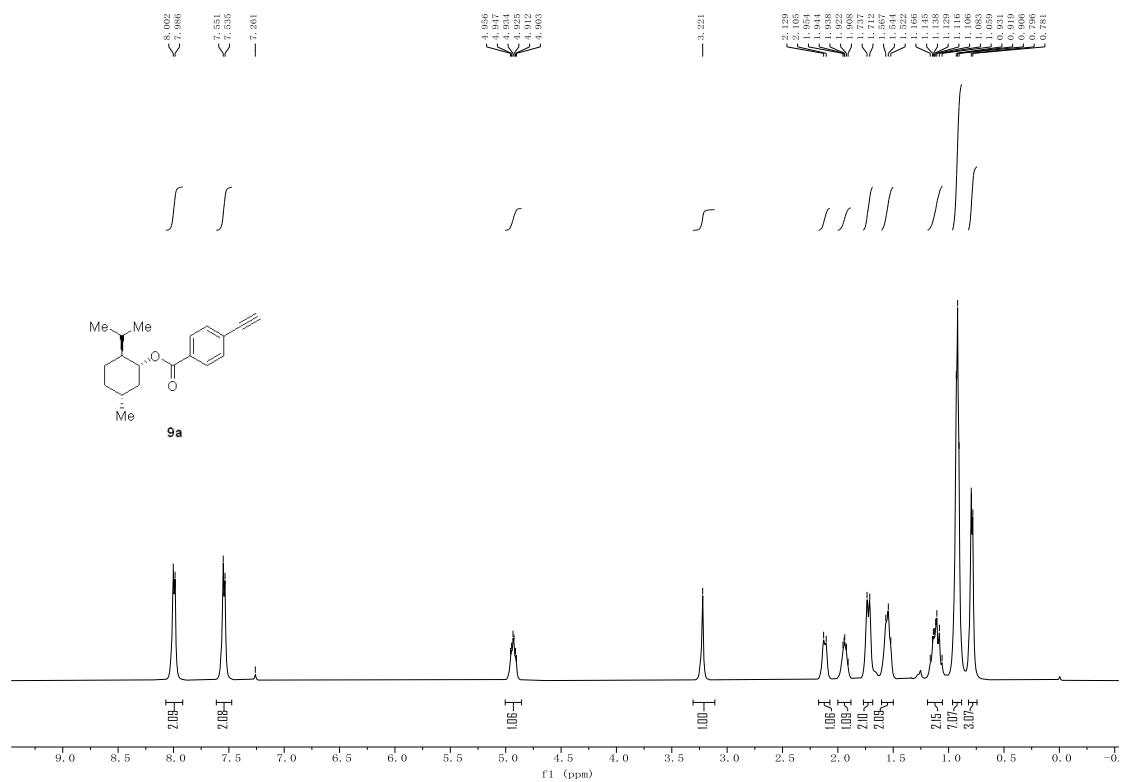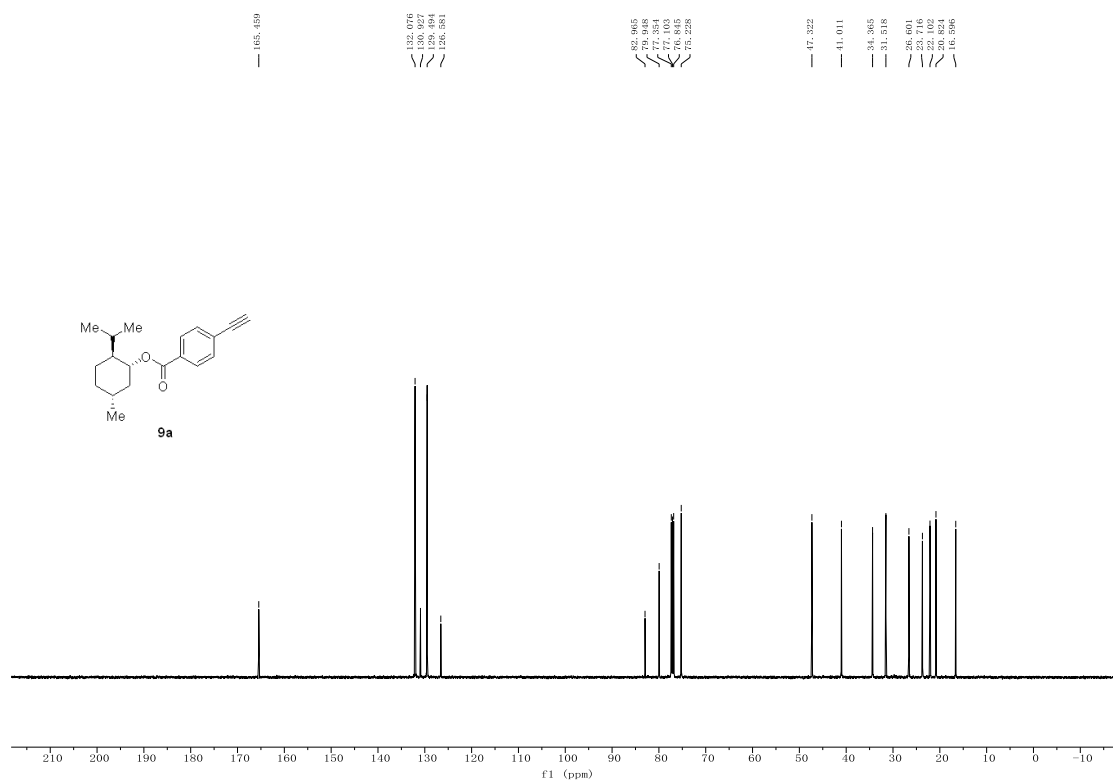

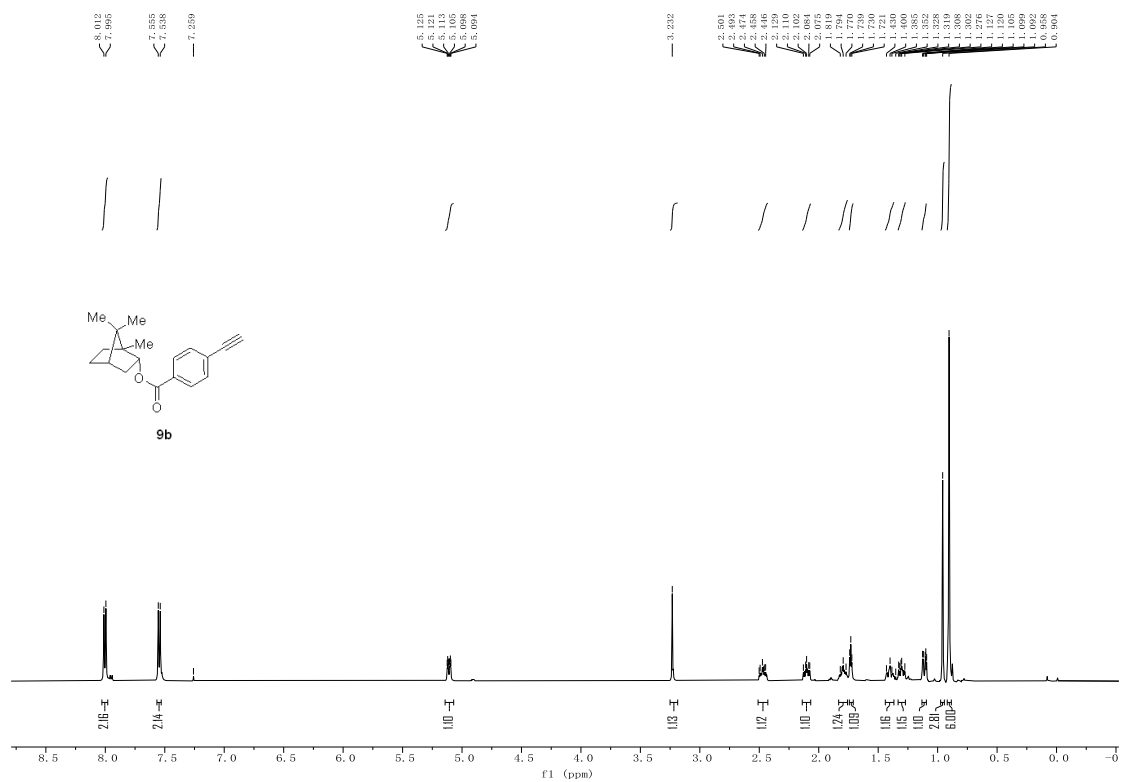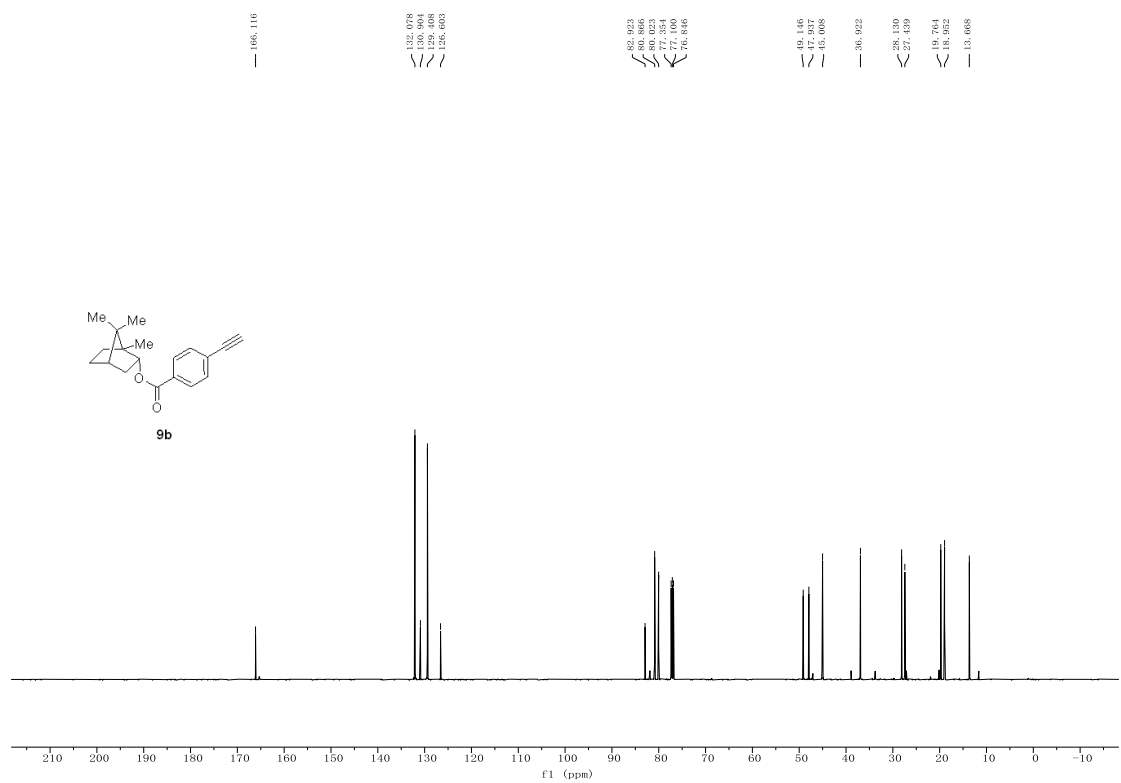

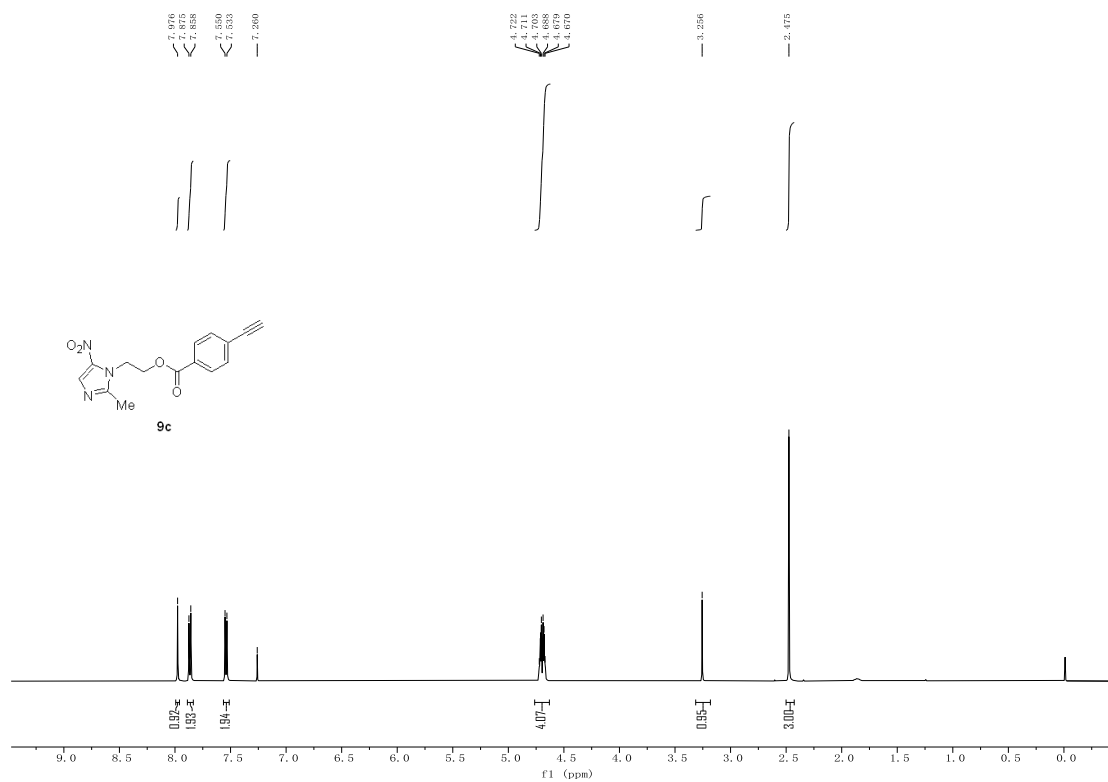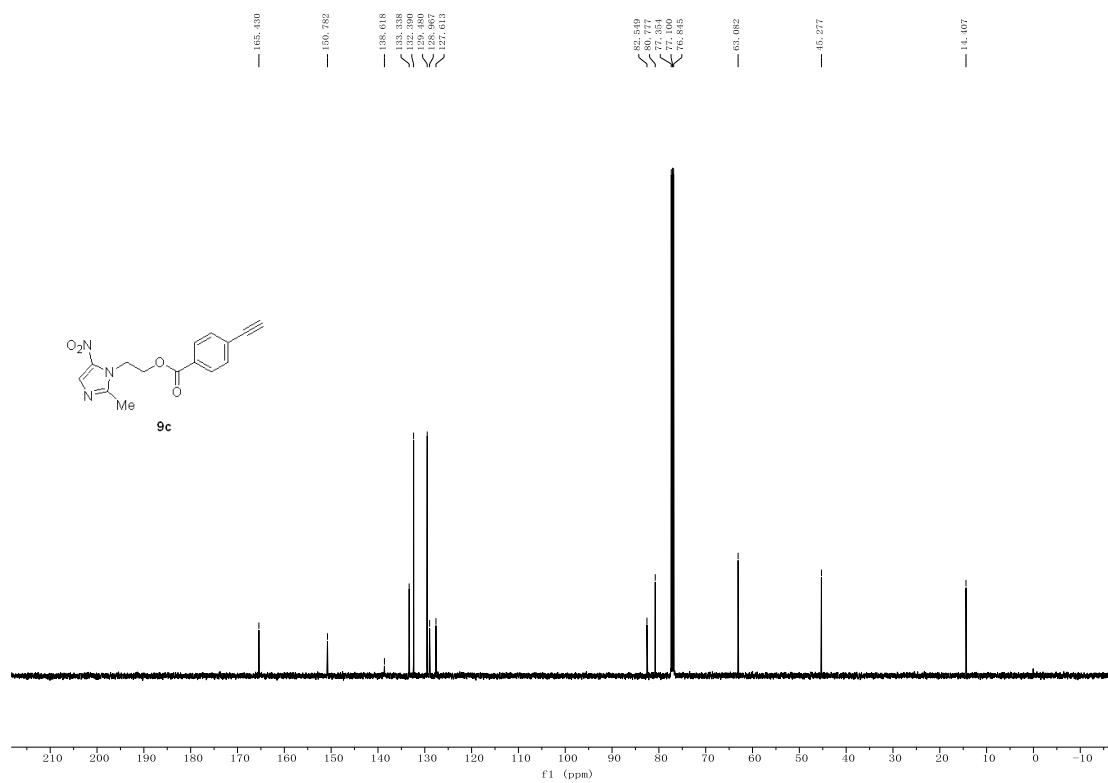



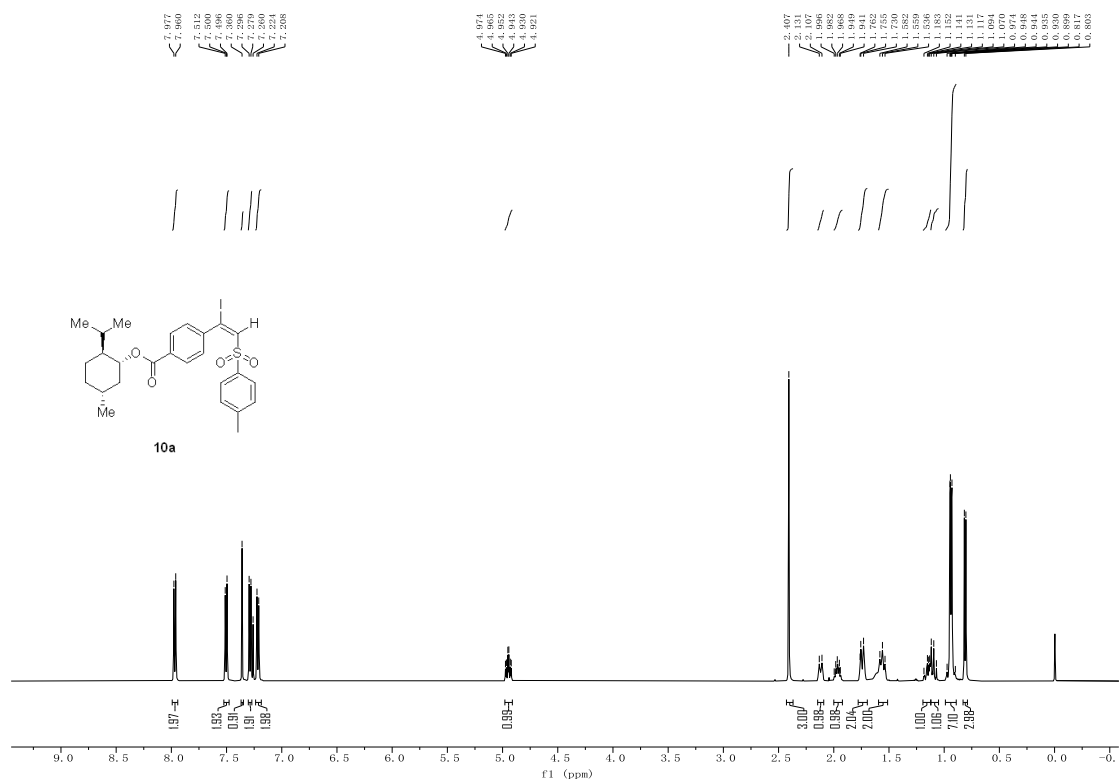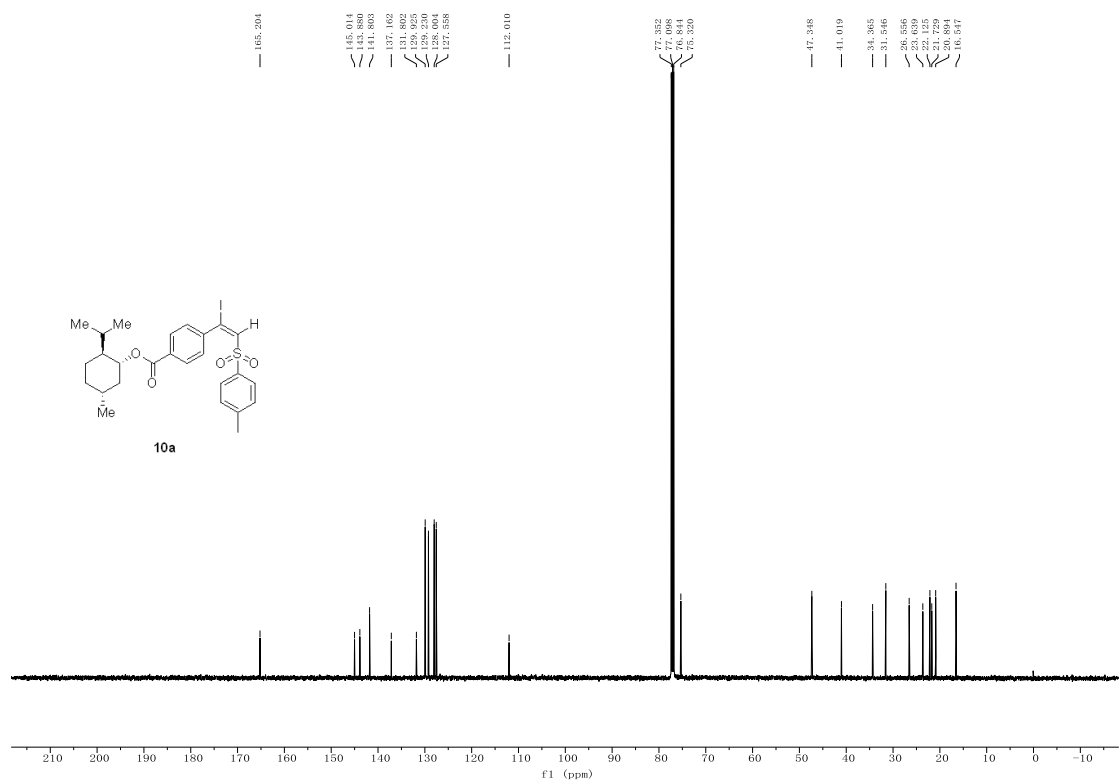

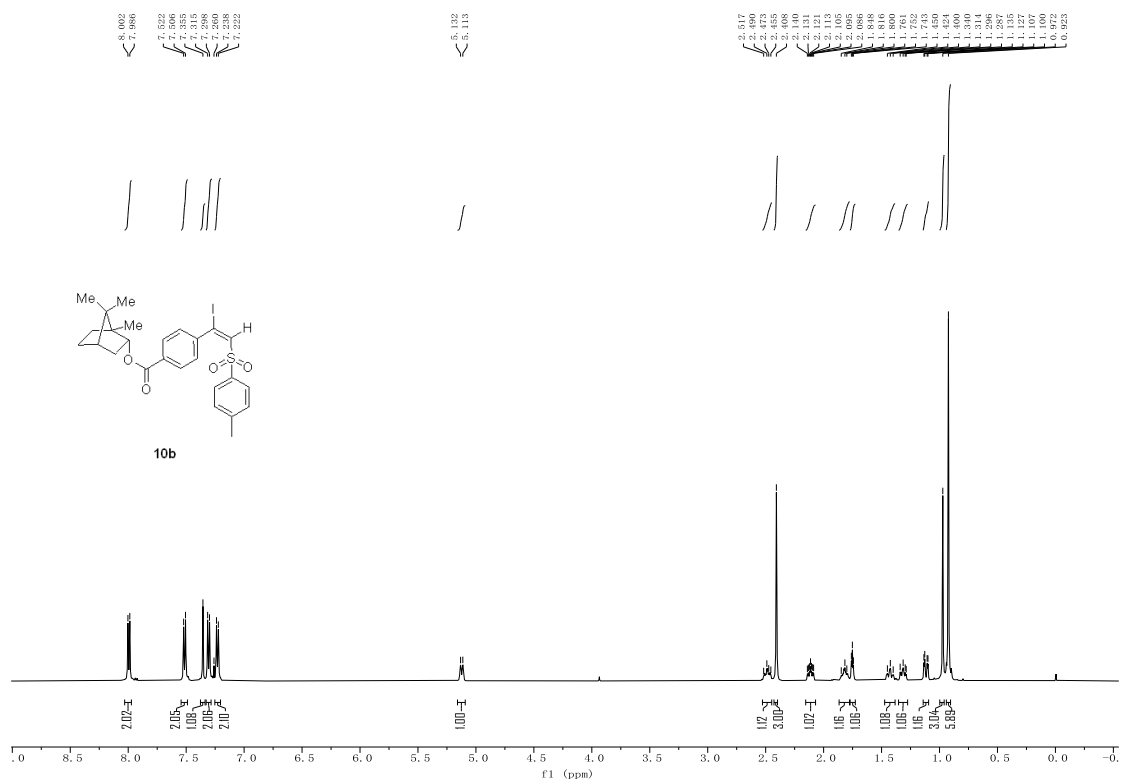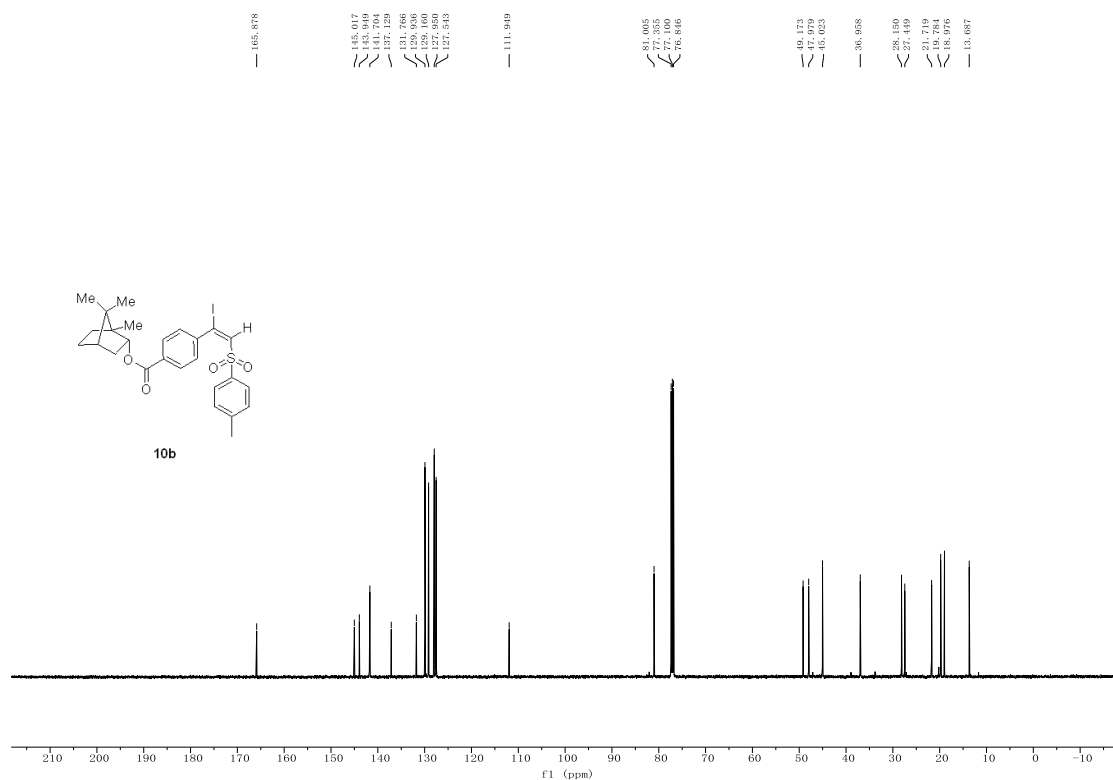

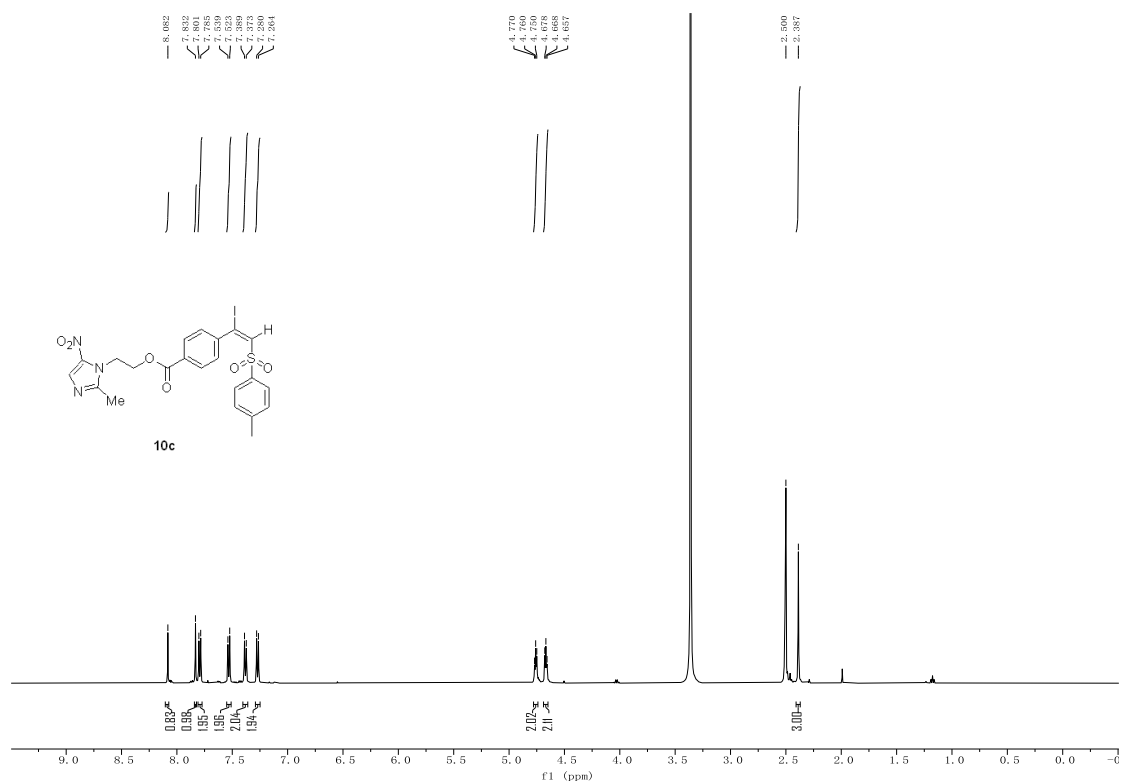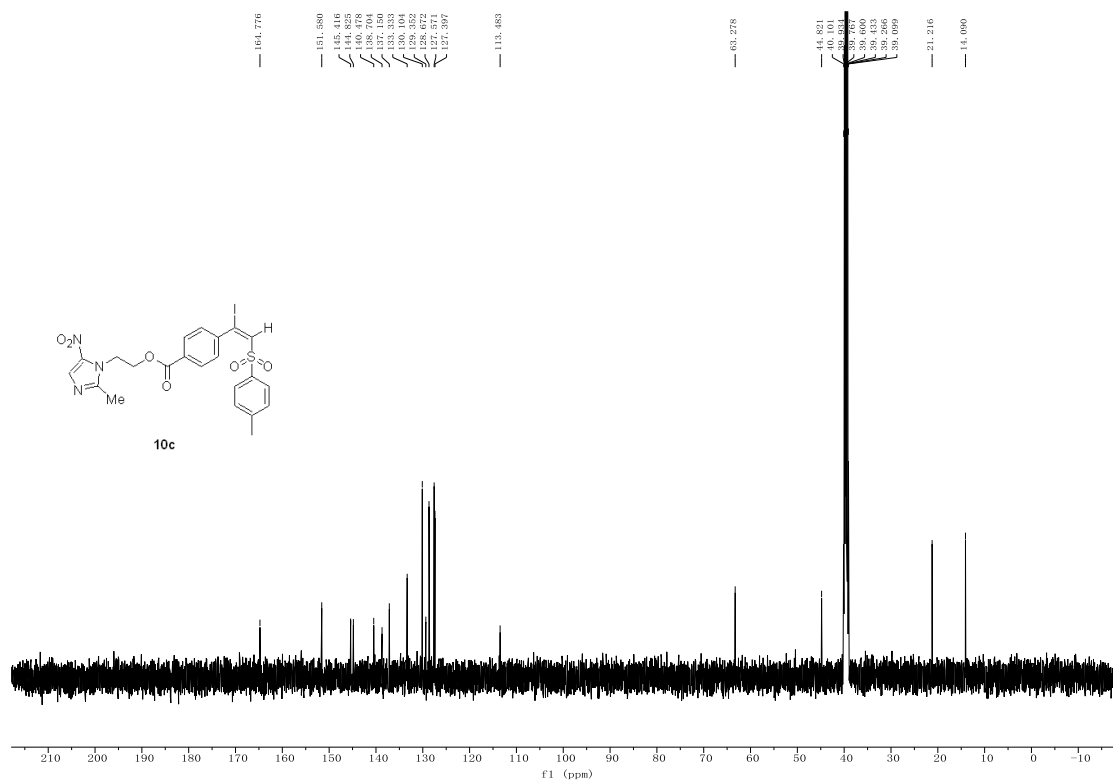

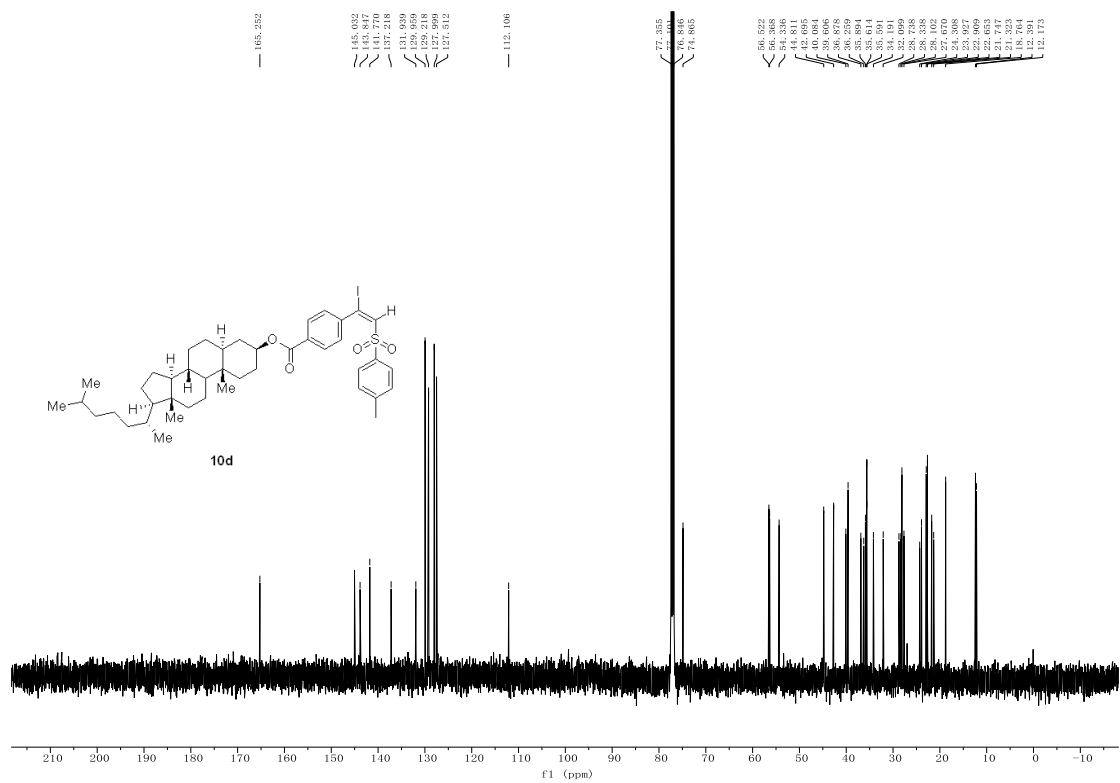

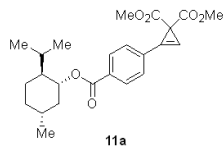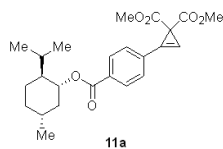

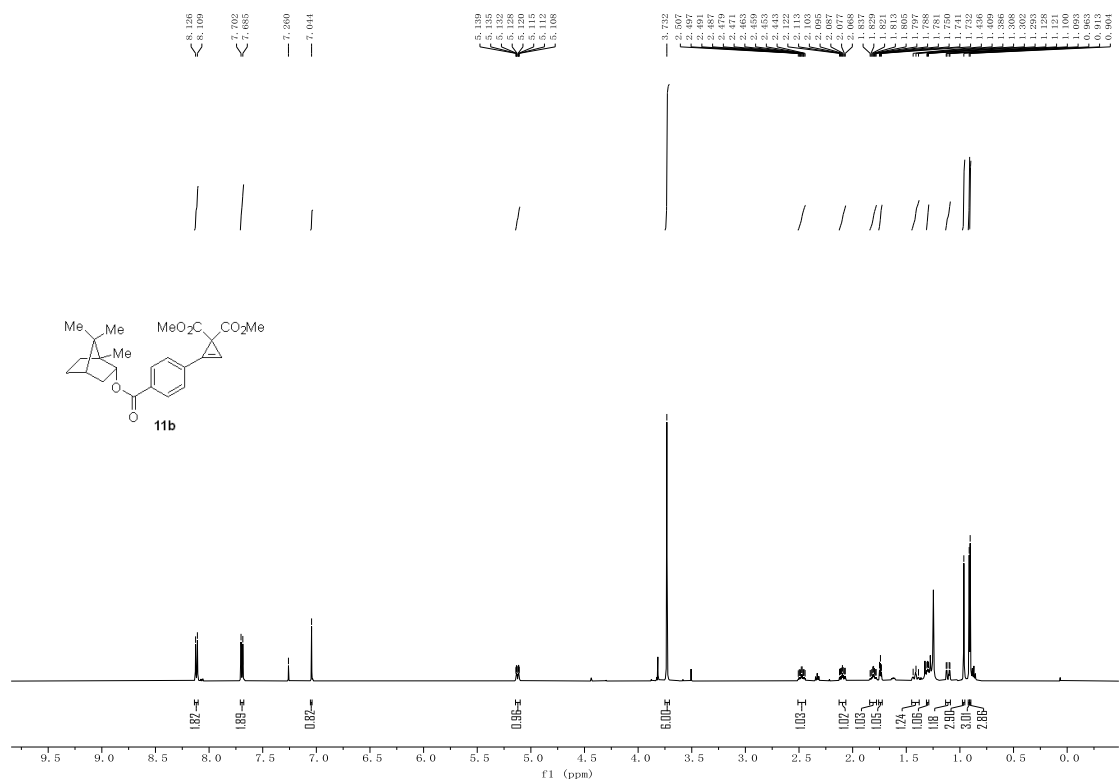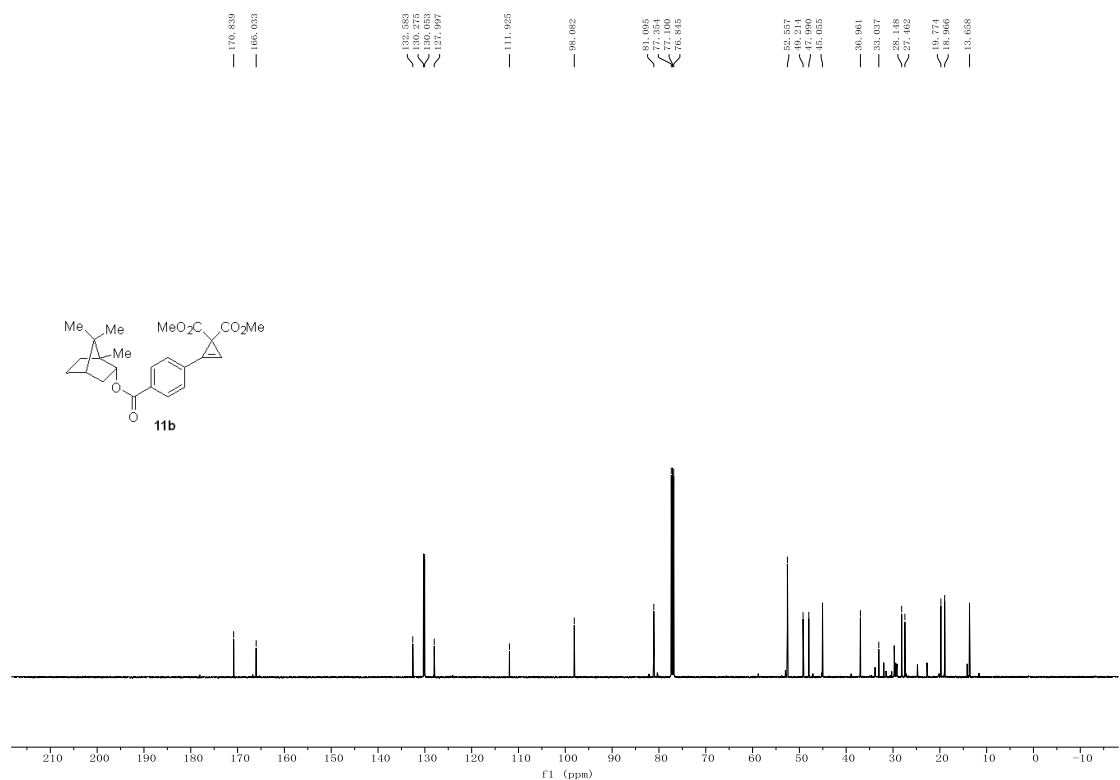

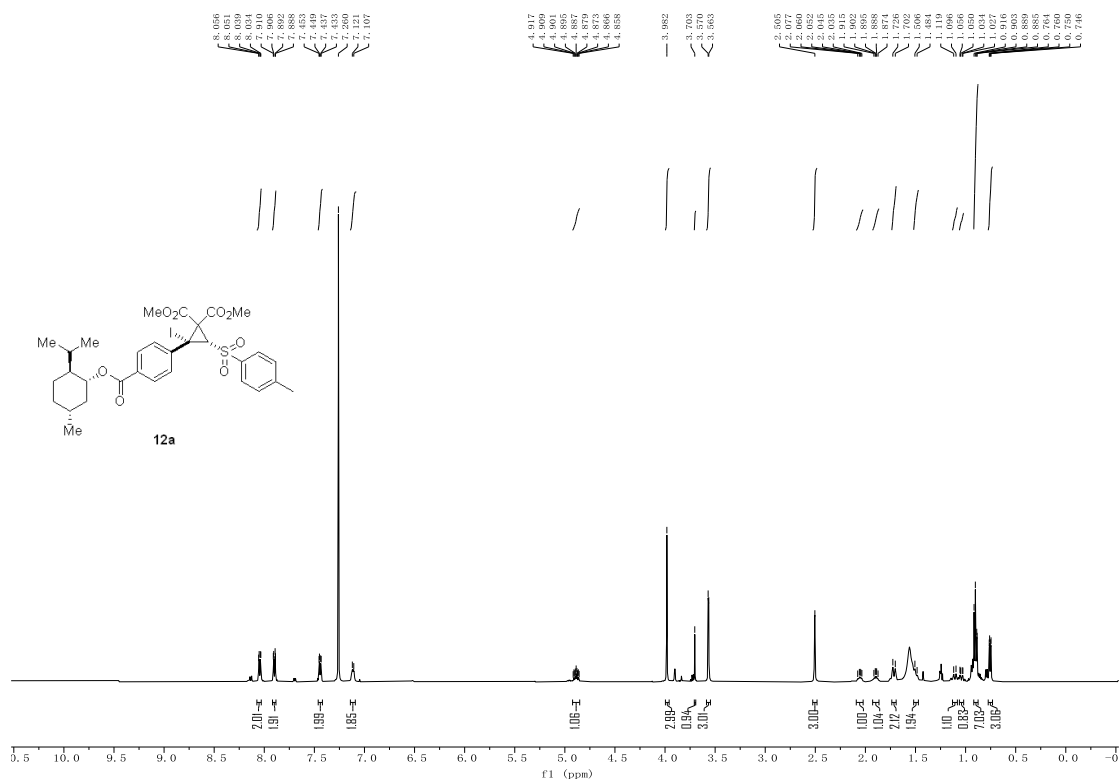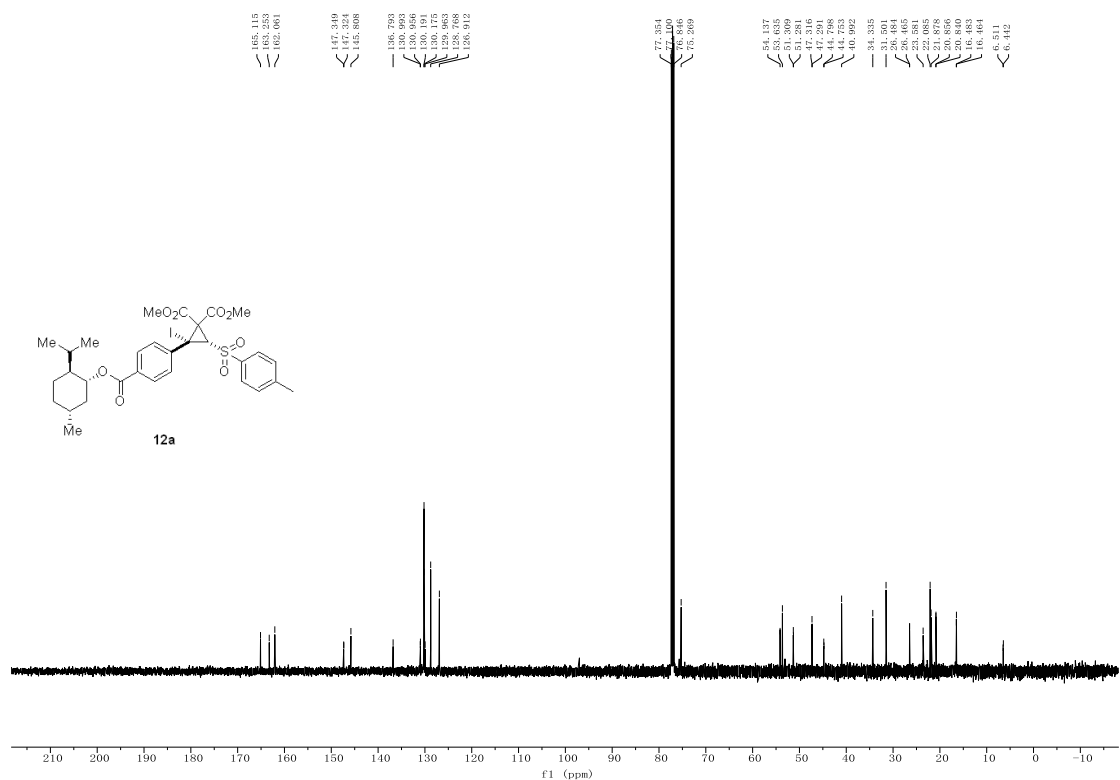

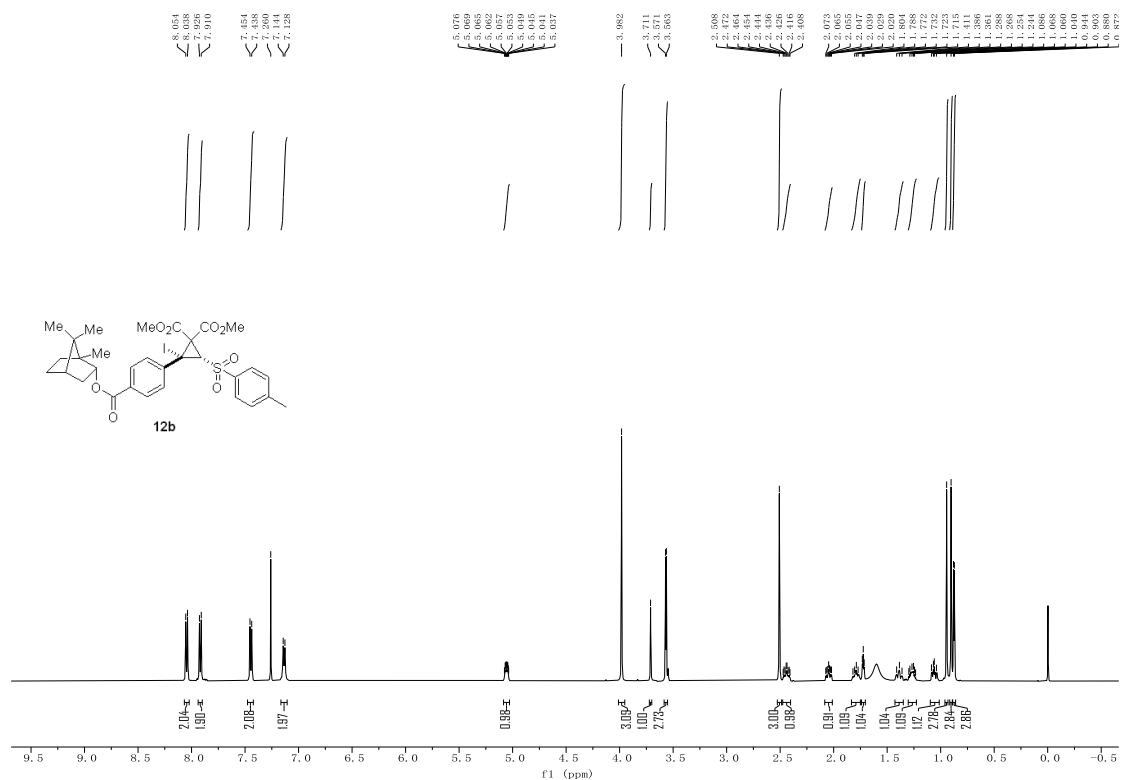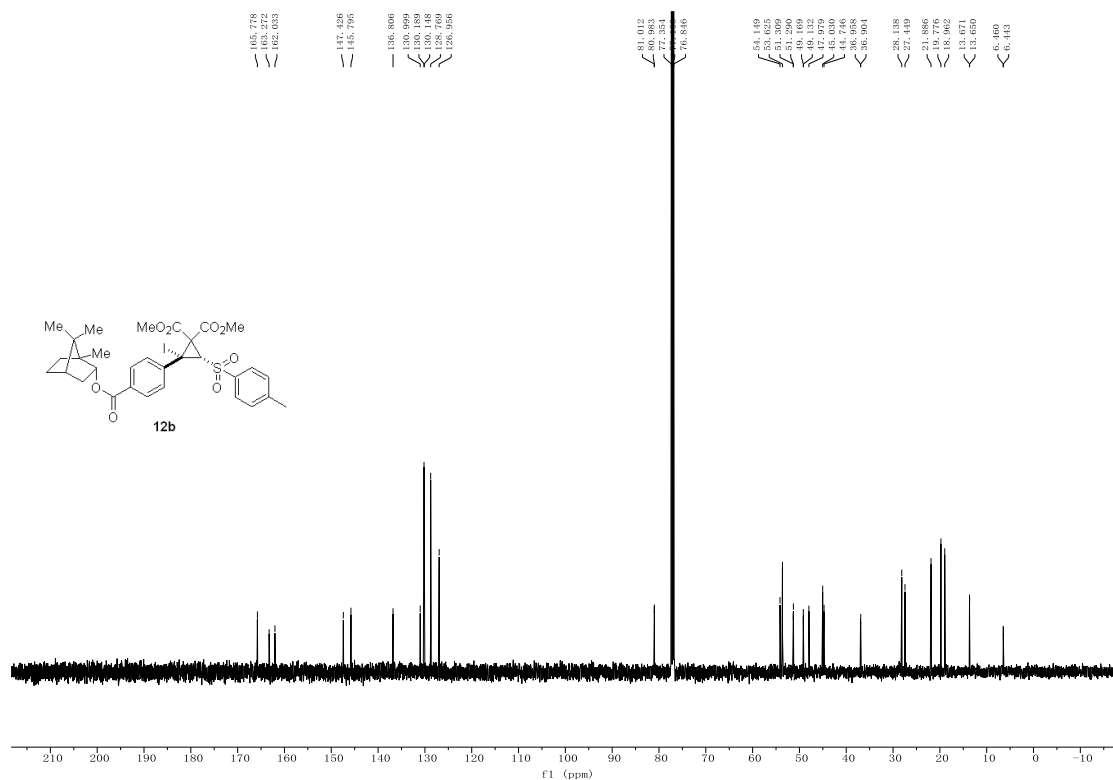

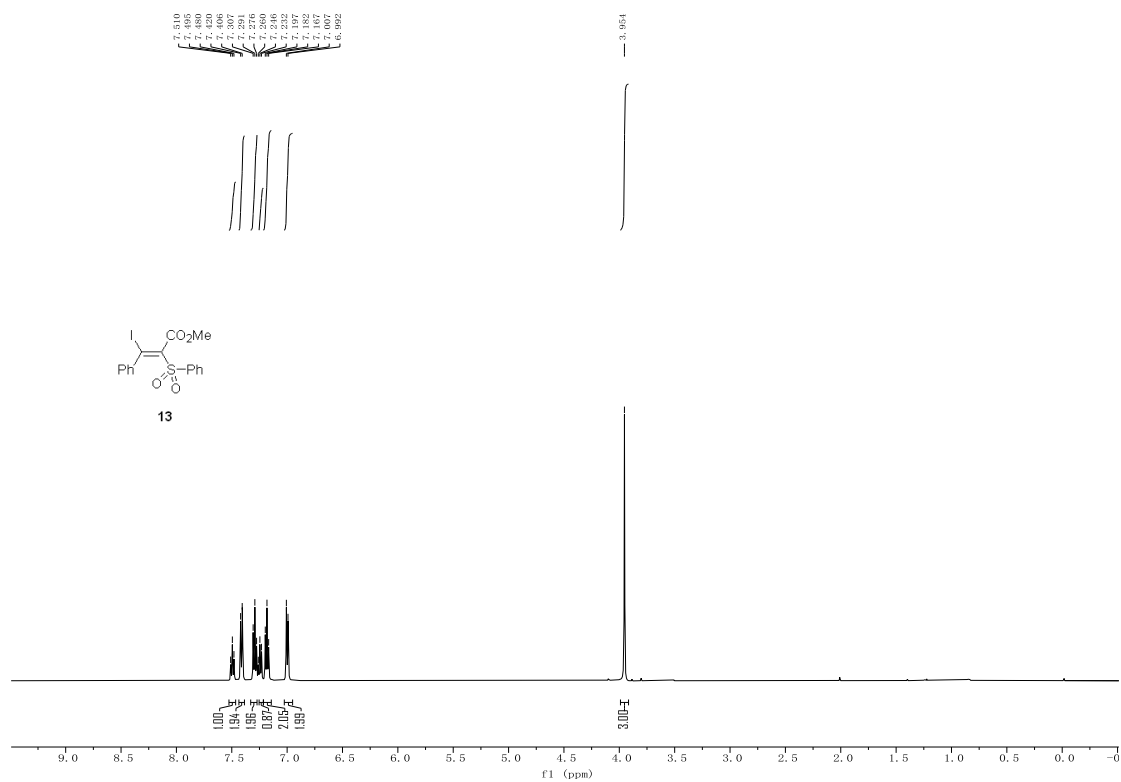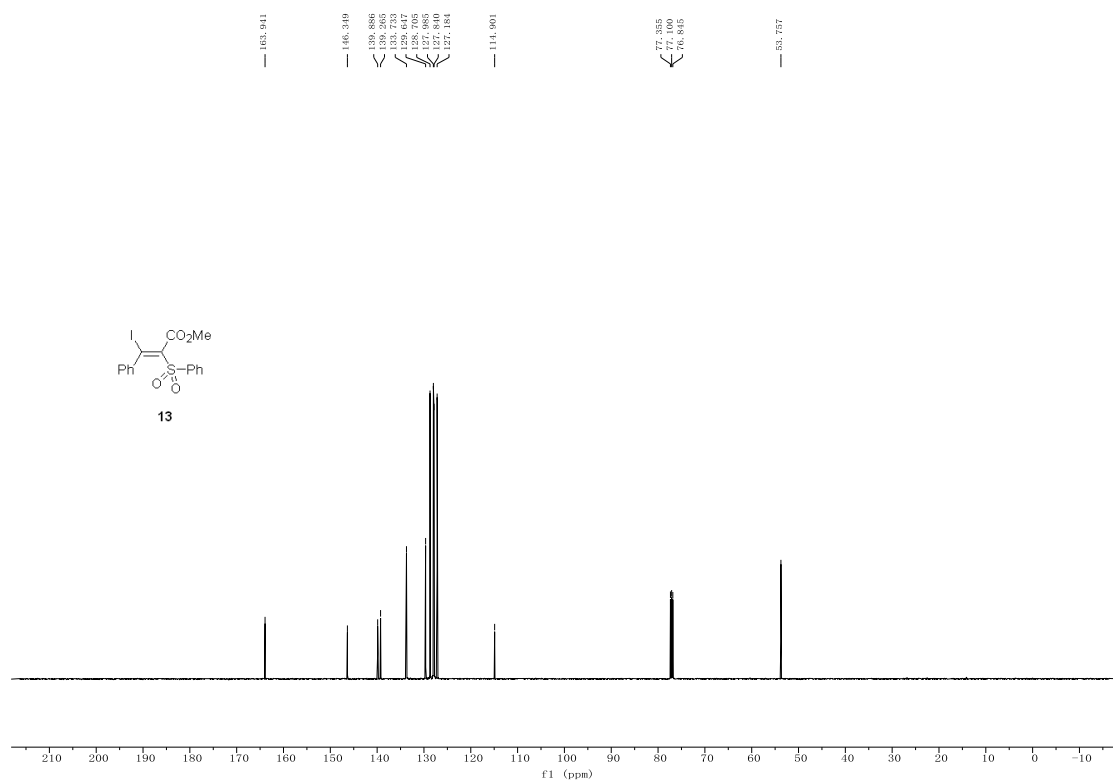

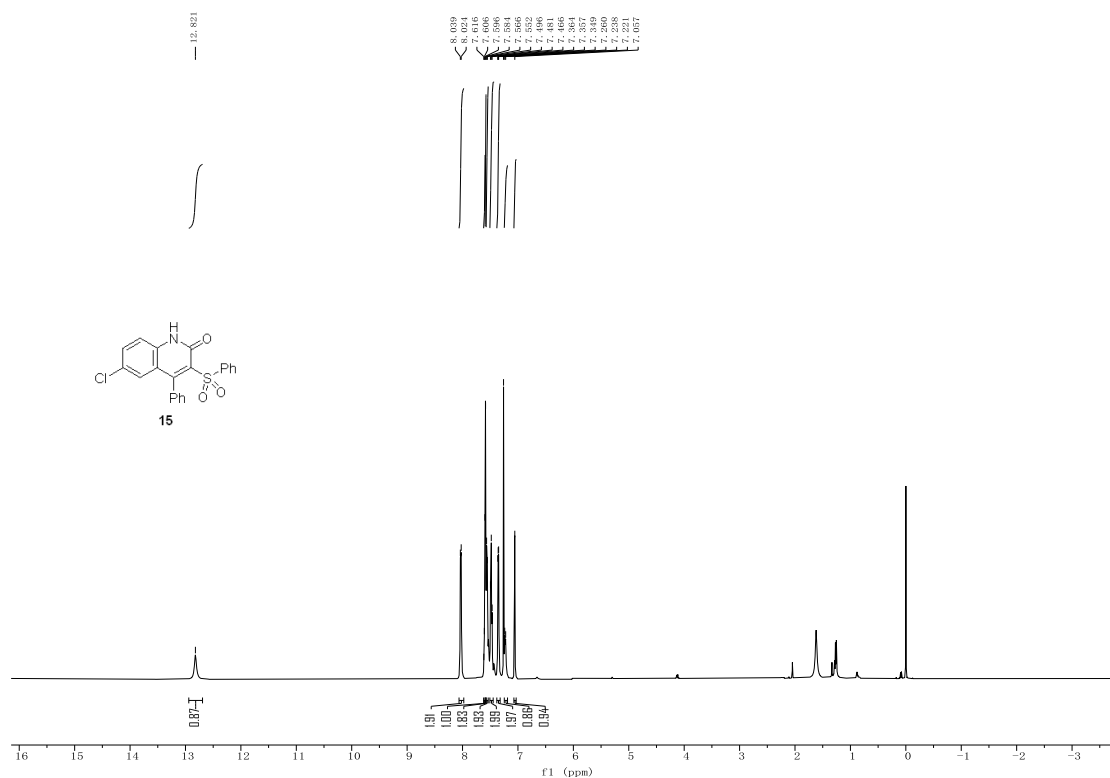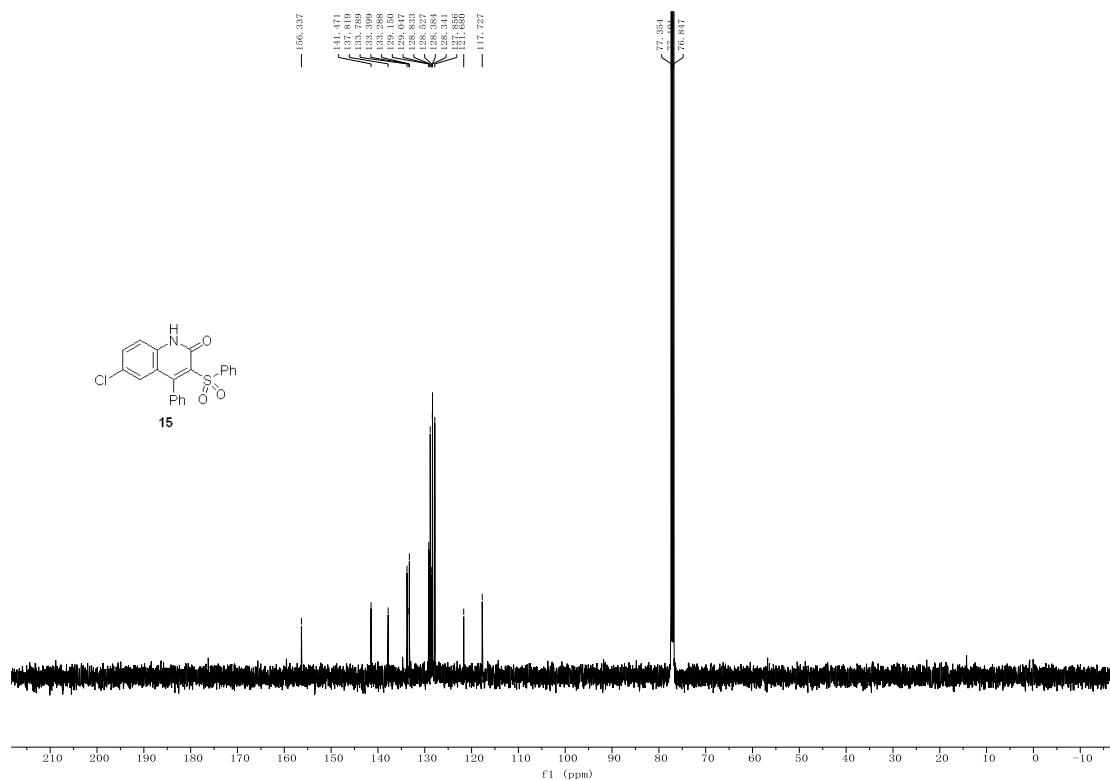

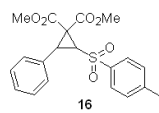

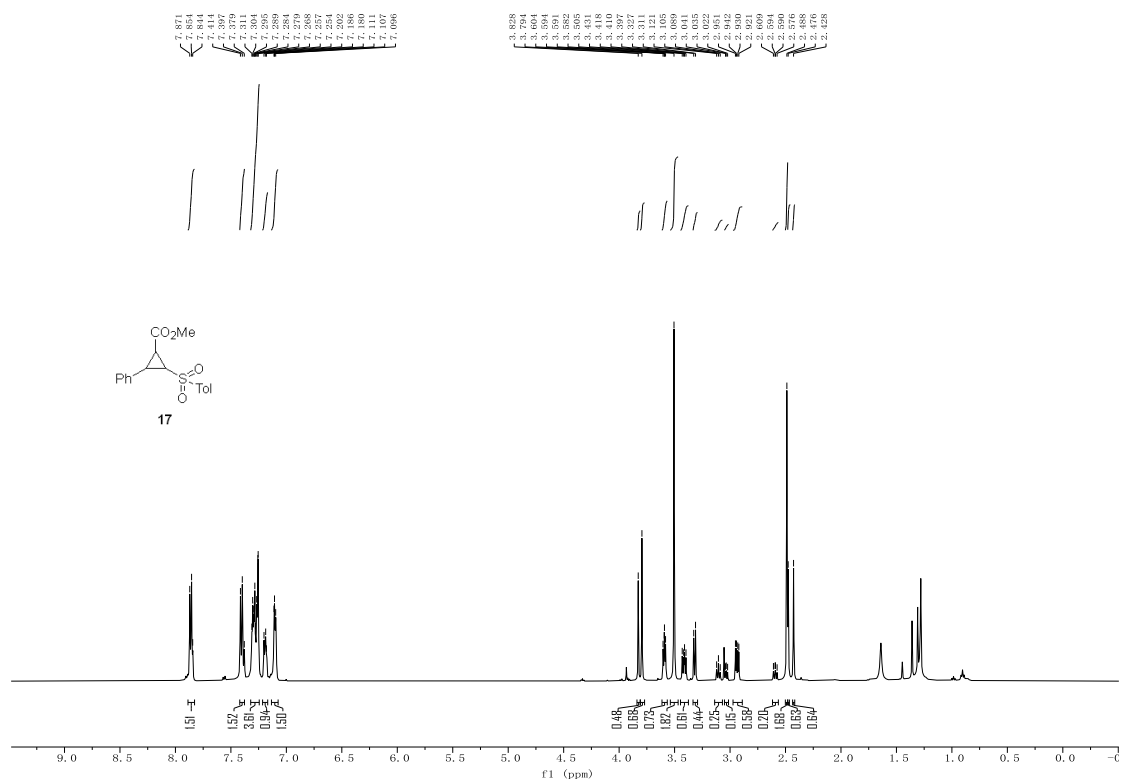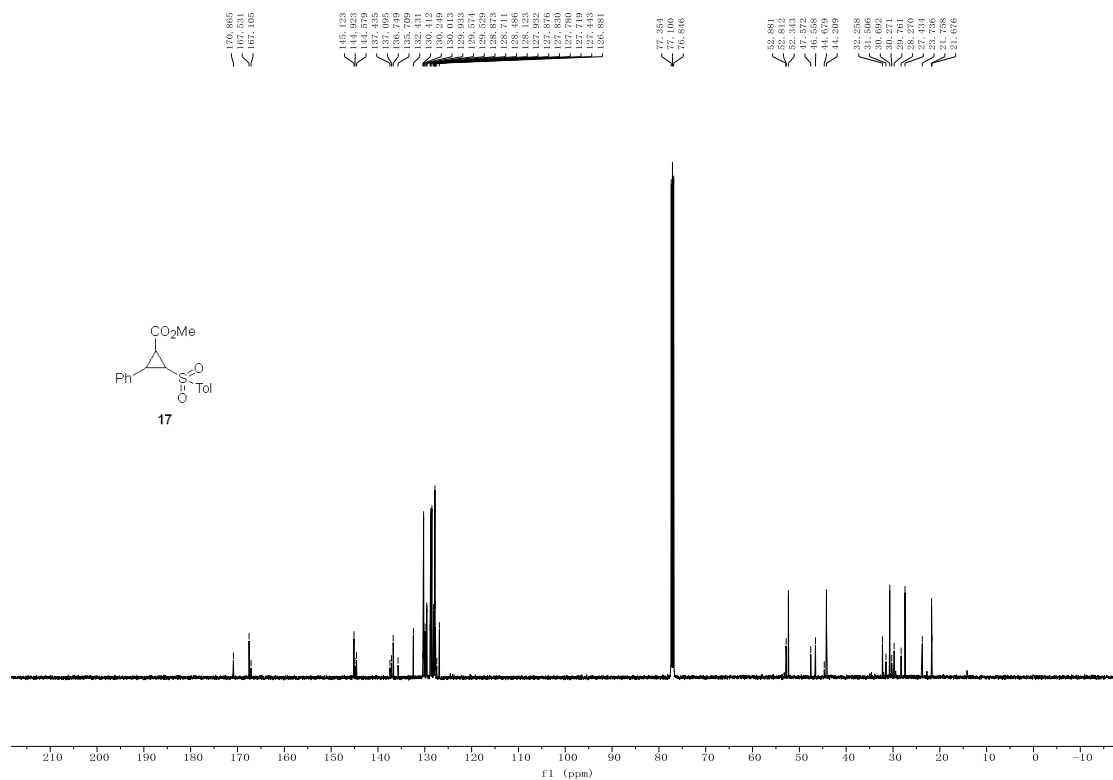

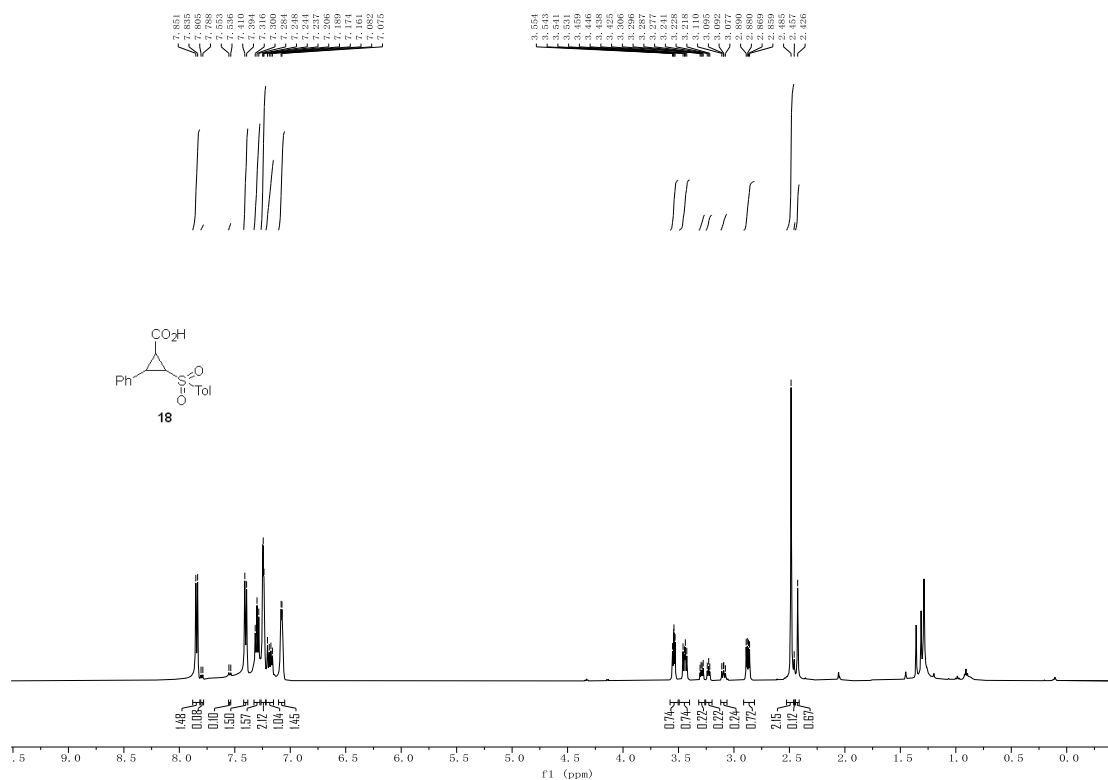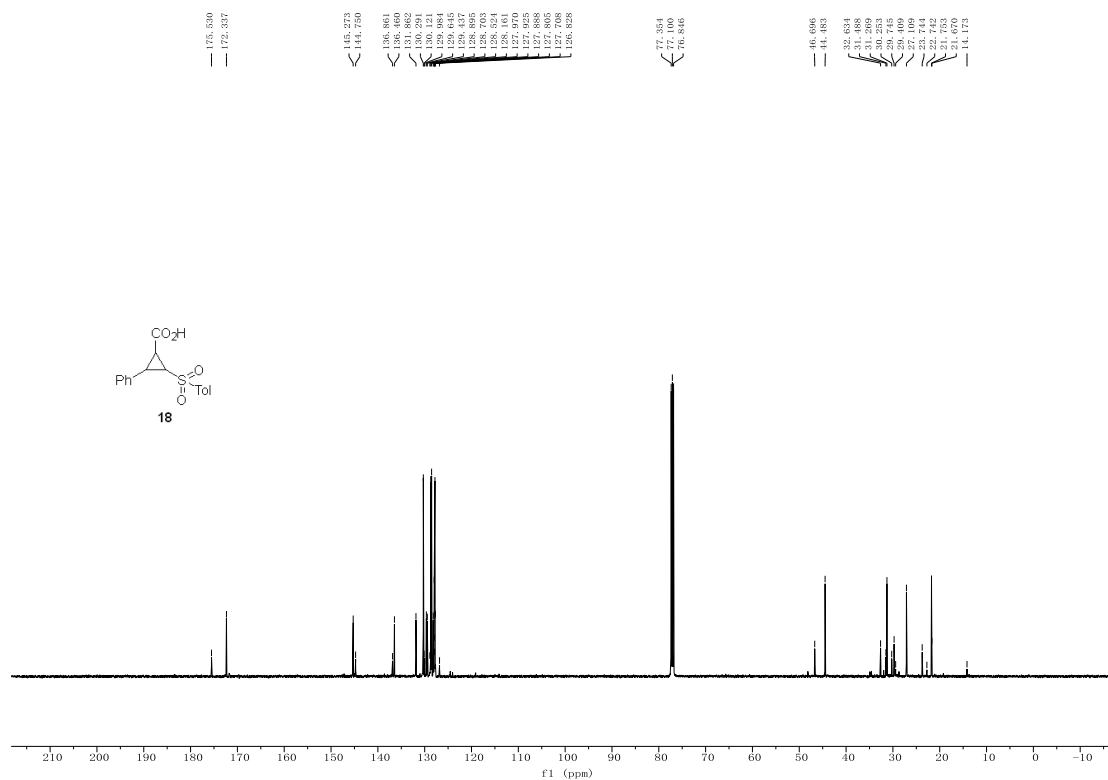

Supplement: d2gc04296g1.pdf [file d2gc04296g1.pdf]
